# Supplementary material for: Preparation, characterization and reactivity of trifluoromethoxy palladium(ii) complexes
Source: Royal Society of Chemistry journal article supplement (doi:10.1039/d2nj04198g), 2022-01-01
Supplement: d2nj04198g1.pdf [file d2nj04198g1.pdf]

## Preparation, Characterization and Reactivity of Trifluoromethoxy Palladium(II) Complexes

Songsong Xu,<sup>†</sup> Yingbo Shao,<sup>‡</sup> Hanliang Zheng,<sup>‡</sup> Xuebing leng,<sup>†</sup> Xiaosong Xue,<sup>‡,†,\*</sup>  
Qilong Shen<sup>†,\*</sup>

<sup>†</sup>Key Laboratory of Organofluorine Chemistry, Shanghai Institute of Organic Chemistry, University of Chinese Academy Sciences, Chinese Academy of Sciences, 345 Lingling Road, Shanghai 200032, P. R. China

<sup>‡</sup>State Key Laboratory of Elemento-Organic Chemistry, Collaborative Innovation Center of Chemical Science and Engineering, Nankai University, Tianjin 300071, China

### Table of Contents

|                                                                                                       |     |
|-------------------------------------------------------------------------------------------------------|-----|
| General information.....                                                                              | S2  |
| Figure S1.....                                                                                        | S3  |
| Figure S2.....                                                                                        | S3  |
| General procedure for preparation of [L <sub>2</sub> Pd(Aryl)(I)].....                                | S4  |
| General procedure for the synthesis of [L <sub>2</sub> Pd(Aryl)(OCF <sub>3</sub> )] <b>2a/b</b> ..... | S5  |
| General procedure for the synthesis of complex [(L)Pd(Ar)(OCF <sub>3</sub> )] <b>5a-d</b> .....       | S7  |
| Computational details.....                                                                            | S14 |
| Reference.....                                                                                        | S37 |
| <sup>1</sup> H and <sup>19</sup> F NMR spectroscopic data.....                                        | S38 |
| X-ray diffraction data of complexes <b>2a</b> , <b>2b</b> , <b>3b'</b> , <b>3c</b> , <b>5a</b> .....  | S59 |

## General information

All glassware was oven or flame dried for several hours prior to use. Solvents were freshly degassed according to the procedures in *Purification of Laboratory Chemicals* prior to use. Tetrahydrofuran, Toluene, Diethyl ether, pentane and benzene were distilled from Na<sup>0</sup>/benzophenone. All syntheses were conducted using standard Schlenk techniques or in an inert atmosphere glovebox. (1,5-COD)Pd(CH<sub>2</sub>TMS)<sub>2</sub> was prepared according to a procedure reported in the literature<sup>1</sup> and stored at -35 °C in an argon filled glovebox when not in use. Unless otherwise noted, all other reagents and starting materials were purchased from commercial sources and used without further purification. <sup>1</sup>H NMR spectra were recorded on a 600 MHz, 500 MHz or 400 MHz spectrometer. <sup>19</sup>F NMR spectra were recorded on a 564 MHz, 470 MHz or 376 MHz spectrometer. <sup>31</sup>P NMR spectra were recorded on a 243 MHz, 202 MHz or 162 MHz spectrometer. <sup>1</sup>H NMR chemical shifts are reported in parts per million (ppm) relative to TMS, with the residual NMR solvent peak used as an internal reference. <sup>19</sup>F NMR chemical shifts are reported in ppm and are referenced to the solvent lock. <sup>31</sup>P NMR spectra were calibrated to an external standard of neat H<sub>3</sub>PO<sub>4</sub> (δ 0.0 ppm). Coupling constants are reported in hertz. The following abbreviations were used to explain the multiplicities: s = singlet; d = doublet; t = triplet; q = quartet; m = multiplet; br = broad.



## General procedure for preparation of [L<sub>2</sub>Pd(Aryl)(I)]

**Synthesis of [(TMEDA)Pd(4-CF<sub>3</sub>-Ph)(I)] 1a.** [(Tmeda)Pd(Aryl)(I)] was synthesized via a modified literature procedure.<sup>2</sup> Under nitrogen, Pd(dba)<sub>2</sub> (11.5 g, 20.0 mmol) was weighed into a 250 mL round bottom flask and THF (150 mL) was added. TMEDA (3.50 g, 30.0 mmol) was added, and the resulting mixture was stirred at 25 °C for 15 min. The appropriate aryl iodide (36.0 mmol, 1.80 equiv.) was added, and the mixture was heated at 60 °C for 30 min. The mixture was filtered through a plug of Celite, and the solvent was removed under reduced pressure. The residue was washed with hexane (20 mL × 3) and then diethyl ether (50 mL × 3) to remove all residual dibenzylidene acetone (dba). The target complex was then dried *in vacuo* and used without further purification.

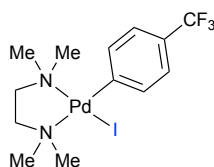

**[(TMEDA)Pd(4-CF<sub>3</sub>-Ph)(I)] 1a.** Complex **1a** was obtained according to the general procedure as a yellow solid (20.0 mmol scale, 6.8 g, 69% yield). <sup>1</sup>H NMR (400 MHz, CDCl<sub>3</sub>) δ 7.42 (d, *J* = 7.8 Hz, 2 H), 7.15 (d, *J* = 7.9 Hz, 2 H), 2.74 (t, *J* = 5.5 Hz, 2 H), 2.69 (s, 6 H), 2.57 (t, *J* = 5.5 Hz, 2 H), 2.32 (s, 6 H); <sup>19</sup>F NMR (376 MHz, CDCl<sub>3</sub>) δ - 61.74 (s) ppm. <sup>1</sup>H and <sup>19</sup>F NMR were consistent with those reported in the literature.<sup>2</sup>

**Synthesis of [(4-CH<sub>3</sub>-Py)<sub>2</sub>Pd(4-CF<sub>3</sub>-Ph)(I)] 1b.** [(4-CH<sub>3</sub>-Py)<sub>2</sub>Pd(4-CF<sub>3</sub>-Ph)(I)] was synthesized via a modified literature procedure.<sup>3</sup> Pd(dba)<sub>2</sub> (5.70 g, 10.0 mmol) was added to a solution of 4-iodobenzotrifluoride (6.80 g, 25.0 mmol) and 4-methylpyridine (9.30 g, 100 mmol) in THF (20.0 mL) at room temperature. The mixture was stirred at room temperature. After 15 min, a yellow precipitate was formed. The thick suspension was stirred at room temperature for another 30 min, and then hexane (30 mL) was added. The precipitate was filtered and washed with diethyl ether (50 mL × 4) and hexane (50 mL × 4) to give complex **1b** as yellow crystals (2.7 g, 48% yield). The complex was used directly without further purification.

**General procedure for the synthesis of [L<sub>2</sub>Pd(Aryl)(OCF<sub>3</sub>)] 2a/b.** In a glovebox under an argon atmosphere, a 20 mL scintillation vial equipped with an oven-dried stirring bar was charged with [L<sub>2</sub>Pd(Ar)(I)] (1.0 mmol, 1.0 equiv), and THF (3.0 mL). To the orange solution, AgOCF<sub>3</sub> (1.0 M in acetonitrile, stored under an argon atmosphere at -35 °C) (1.1 mL, 1.1 mmol, 1.0 equiv.) was added slowly by a plastic syringe. The mixture was stirred violently at room temperature, and the color of the mixture turned from orange to yellow. Upon completion, the crude was filtered through a 0.22 μm microfiltration membrane<sup>®</sup> using THF (2.0 mL) as eluent. The filtrate was collected, concentrated to ~0.5 mL, then Et<sub>2</sub>O (30 mL) was added. An off-white colored precipitate was formed. The mixture was stored in a -35 °C freezer for 1 h. The precipitate was collected by filtration and washed with Et<sub>2</sub>O (10 mL × 2), and dried under vacuum to give [L<sub>2</sub>Pd(Ar)(OCF<sub>3</sub>)] as a solid.

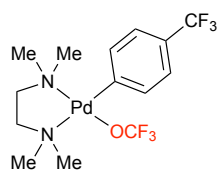

**[(TMEDA)Pd(4-CF<sub>3</sub>-Ph)(OCF<sub>3</sub>)] 2a.** Complex **2a** was obtained according to the general procedure as a yellow solid (1.5 mmol scale, 461.9 mg, 68% yield). <sup>1</sup>H NMR (400 MHz, THF-*d*<sub>8</sub>) δ 7.53 (d, *J* = 7.7 Hz, 2 H), 7.13 (d, *J* = 7.7 Hz, 2 H), 2.78 (t, *J* = 5.6 Hz, 2 H), 2.61 (t, *J* = 5.6 Hz, 2 H), 2.57 (s, 6 H), 2.42 (s, 6 H); <sup>19</sup>F NMR (376 MHz, THF-*d*<sub>8</sub>) δ -31.98 (s, 3 F), -62.46 (s, 3 F) ppm. Anal. Calcd. for C<sub>14</sub>H<sub>20</sub>F<sub>6</sub>N<sub>2</sub>OPd: C, 37.14; H, 4.45; N, 6.19. Found: C, 37.18; H, 4.63; N, 6.35.

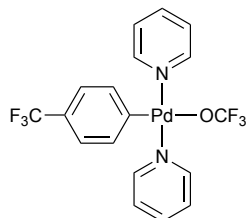

**[*trans*-(4-CH<sub>3</sub>-Py)<sub>2</sub>Pd(4-CF<sub>3</sub>-Ph)(OCF<sub>3</sub>)] 2b.** Complex **2b** was obtained according to the general procedure as a white solid (1.0 mmol scale, 315.3 mg, 60% yield). <sup>1</sup>H NMR (400 MHz, THF-*d*<sub>8</sub>) δ 8.46 (d, *J* = 6.2 Hz, 4 H), 7.42 (d, *J* = 7.9 Hz, 2 H), 7.18 (d, *J* = 6.2 Hz, 4 H), 7.10 (d, *J* = 8.1 Hz, 2 H), 2.32 (s, 6 H); <sup>19</sup>F NMR (376 MHz, THF-*d*<sub>8</sub>) δ -

31.40 (br, 3 F), -62.77 (s, 3 F);  $^{19}\text{F}$  NMR (565 MHz, THF- $d_8$ , 253 K)  $\delta$  -31.34 (s, 3 F), -62.52 (s, 3 F) ppm. Anal. Calcd. for  $\text{C}_{22}\text{H}_{18}\text{F}_6\text{N}_2\text{OPd}$ : C, 45.95; H, 3.47; N, 5.36. Found: C, 45.93; H, 3.58; N, 5.35.

**4-(Trifluoromethyl)benzoyl fluoride 2c.** The yield (98%) and chemical shift were determined by  $^{19}\text{F}$  NMR spectroscopy using (trifluoromethoxy)benzene (-58.0 ppm) as reference. Characterization of **2c** in reaction solution:  $^{19}\text{F}$  NMR (unlocked)  $\delta$  18.81 (s, 1 F) -63.72 (s, 3 F) ppm. GC-MS (EI): 192  $[\text{M}]^+$ .

**Synthesis of [(DPPF)Pd(4-CH<sub>3</sub>-Py)(4-CF<sub>3</sub>-Ph)][OTf] 3c.** In a glovebox under an argon atmosphere, a 25 mL round-bottom flask equipped with an oven-dried stirring bar was charged with **2b** (156.6 mg, 0.3 mmol), DPPF (166.3 mg, 0.3 mmol), toluene (3.0 mL) and THF (1.0 mL). After stirred at room temperature for 5 min, TMSOTf (80.0 mg, 0.36 mmol) was added. The mixture was stirred violently at room temperature for another 5 min, resulted in a yellow suspend. Upon completion, Et<sub>2</sub>O (20 mL) was added and a precipitate was formed. The solvent was decanted and the residue was washed by a mixed solvent of Et<sub>2</sub>O/THF (22 ml, v/v = 10:1) twice. Complex **3c** (270.3 mg, 87%) was obtained as a yellow solid.

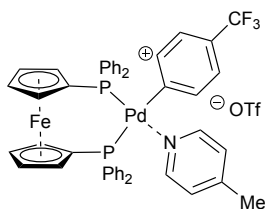

$^1\text{H}$  NMR (400 MHz,  $\text{CD}_2\text{Cl}_2$ )  $\delta$  7.94 (d,  $J = 5.7$  Hz, 2 H), 7.60 – 7.39 (m, 20 H), 7.06 – 7.02 (m, 2 H), 6.77 – 6.72 (m, 2 H), 4.46 – 4.41 (m, 8 H), 2.14 (s, 3 H);  $^{19}\text{F}$  NMR (376 MHz,  $\text{CD}_2\text{Cl}_2$ )  $\delta$  -62.73 (s, 3 F), -78.85 (s, 3 F);  $^{31}\text{P}$  NMR (162 MHz,  $\text{CD}_2\text{Cl}_2$ )  $\delta$  28.81 (d,  $J = 26.8$  Hz), 16.30 (d,  $J = 26.9$  Hz) ppm. Anal. Calcd. for  $\text{C}_{48}\text{H}_{39}\text{F}_6\text{FeNO}_3\text{P}_2\text{PdS}$ : C, 55.01; H, 3.75; N, 1.34; Found: C, 54.91; H, 3.95; N, 1.54. Single crystals of complex **3c** were obtained by layering a solution of complex **3c** in dichloromethane with ether at -35 °C.

**General procedure for the synthesis of complex [(L)Pd(Ar)(I)].**<sup>4</sup> In an argon-filled glovebox, an oven-dried scintillation vial (20 mL) equipped with a magnetic stir bar was charged with ligand (1.1 equiv) and ArX (3.0 equiv). Cyclohexane was added dropwise with stirring until the ligand was dissolved. [(COD)Pd(CH<sub>2</sub>SiMe<sub>3</sub>)<sub>2</sub>] (1.0 equiv) was added rapidly in one portion. The mixture was allowed to stir overnight at room temperature. Pentane (10.0 mL) was added and the mixture was placed into a -20 °C freezer for 1 h. The vial was then taken outside of the glovebox, and the precipitate was filtered through a sintered glass frit, washed with pentane for three times, and dried under reduced pressure to afford complex [(L)Pd(Ar)(I)].

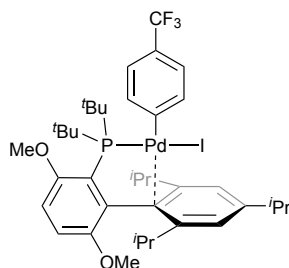

**[(<sup>t</sup>Bu-BrettPhos)Pd(4-CF<sub>3</sub>-Ph)(I)] 4a.** Following the general procedure, a mixture containing <sup>t</sup>Bu-BrettPhos (1.07 g, 2.2 mmol), 4-iodobenzotrifluoride (1.63 g, 6.00 mmol), and [(COD)Pd(CH<sub>2</sub>SiMe<sub>3</sub>)<sub>2</sub>] (0.78 g, 2.0 mmol) was stirred at room temperature in cyclohexane (7.0 mL) to afford complex **4a** (0.83 g, 40% yield) as a yellow solid. <sup>1</sup>H NMR (400 MHz, CD<sub>2</sub>Cl<sub>2</sub>) δ 7.29 – 7.25 (m, 2 H), 7.11 – 7.07 (m, 2 H), 6.98 – 6.92 (m, 3 H), 6.85 (d, *J* = 8.8 Hz, 2 H), 3.79 (s, 3 H), 3.30 (s, 3 H), 3.12 – 3.08 (m, 1 H), 2.62 – 2.56 (m, 2 H), 1.60 (d, *J* = 6.7 Hz, 6 H), 1.46 – 1.29 (m, 24 H), 0.80 (d, *J* = 6.6 Hz, 6 H); <sup>19</sup>F NMR (376 MHz, CD<sub>2</sub>Cl<sub>2</sub>) δ -61.90 (s); <sup>31</sup>P NMR (162 MHz, CD<sub>2</sub>Cl<sub>2</sub>) δ 65.33 (s) ppm. Anal. Calcd. for C<sub>38</sub>H<sub>53</sub>F<sub>3</sub>IO<sub>2</sub>PPd: C, 52.88; H, 6.19; Found: C, 52.46; H, 6.05.

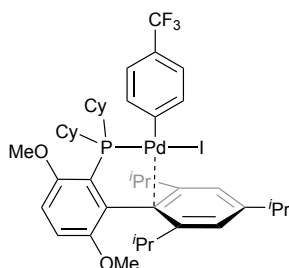

**[(BrettPhos)Pd(4-CF<sub>3</sub>-Ph)(I)] 4b.** Following the general procedure, a mixture containing BrettPhos (1.18 g, 2.20 mmol), 4-iodobenzotrifluoride (1.63 g, 6.00 mmol), and [(COD)Pd(CH<sub>2</sub>SiMe<sub>3</sub>)<sub>2</sub>] (0.78 g, 2.0 mmol) was stirred at room temperature in cyclohexane (5.0 mL) to afford complex **4b** (1.22 g, 67%) as a yellow solid. Clean <sup>1</sup>H NMR spectra for complex **4b** could not be obtained due to its very rapid isomerization in solution (1:1). <sup>19</sup>F NMR (376 MHz, CD<sub>2</sub>Cl<sub>2</sub>) δ -60.05 (s, 3 F), -60.25 (s, 3 F); <sup>31</sup>P NMR (162 MHz, CD<sub>2</sub>Cl<sub>2</sub>) δ 43.56 (s, 1 P), 34.05 (s, 1 P) ppm. Anal. Calcd. for C<sub>42</sub>H<sub>57</sub>F<sub>3</sub>IO<sub>2</sub>PPd: C, 55.12; H, 6.28; Found: C, 55.15; H, 6.27.

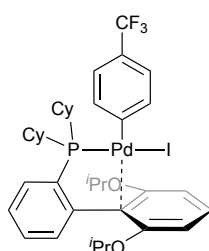

**[(RuPhos)Pd(4-CF<sub>3</sub>-Ph)(I)] 4c.** Following the general procedure, a mixture containing RuPhos (1.0 g, 2.2 mmol), 4-iodobenzotrifluoride (1.63 g, 6.00 mmol), and [(COD)Pd(CH<sub>2</sub>SiMe<sub>3</sub>)<sub>2</sub>] (0.78 g, 2.0 mmol) was stirred at room temperature in cyclohexane (4.0 mL) to afford complex **4c** (1.52 g, 90%) as a bright yellow solid. <sup>1</sup>H NMR (500 MHz, CD<sub>2</sub>Cl<sub>2</sub>) δ 7.64 (d, *J* = 8.4 Hz, 1 H), 7.61 (d, *J* = 5.6 Hz, 1 H), 7.45 (t, *J* = 7.5 Hz, 1 H), 7.38 (t, *J* = 7.5 Hz, 1 H), 7.25 (d, *J* = 7.8 Hz, 2 H), 7.14 (d, *J* = 8.1 Hz, 2H), 6.85 (dd, *J* = 7.7, 2.0 Hz, 1 H), 6.68 (d, *J* = 8.4 Hz, 2 H), 4.60 (hept, *J* = 6.0 Hz, 2 H), 2.16 – 2.09 (m, 2 H), 1.77 – 1.75 (m, 6 H), 1.67 – 1.64 (m, 4 H), 1.59 – 1.51 (m, 2 H), 1.39 (d, *J* = 6.0 Hz, 6 H), 1.24 – 1.16 (m, 4 H), 1.12 – 1.07 (m, 2 H), 1.02 (d, *J* = 6.1 Hz, 6 H), 0.72 – 0.66 (m, 2 H); <sup>19</sup>F NMR (471 MHz, CD<sub>2</sub>Cl<sub>2</sub>) δ -62.03 (s); <sup>31</sup>P NMR (202 MHz, CD<sub>2</sub>Cl<sub>2</sub>) δ 27.10 (s) ppm. Anal. Calcd. for C<sub>37</sub>H<sub>47</sub>F<sub>3</sub>IO<sub>2</sub>PPd: C, 52.59; H, 5.61; Found: C, 52.31; H, 5.62.

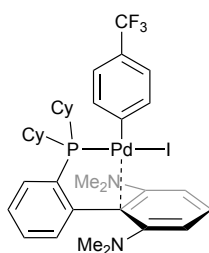



**[(CPhos)Pd(4-CF<sub>3</sub>-Ph)(I)] 4d.** Following the general procedure, a mixture containing CPhos (0.44 g, 1.10 mmol), 4-iodobenzotrifluoride (1.36 g, 5.00 mmol), and [(COD)Pd(CH<sub>2</sub>SiMe<sub>3</sub>)<sub>2</sub>] (0.39 g, 1.00 mmol) was stirred at room temperature in cyclohexane (7.0 mL) to afford complex **4d** (0.48 g, 59%) as a light yellow solid. <sup>1</sup>H NMR (400 MHz, CDCl<sub>3</sub>) δ 7.67 (t, *J* = 7.1 Hz, 1 H), 7.56 (t, *J* = 8.1 Hz, 1 H), 7.43 (t, *J* = 7.5 Hz, 1 H), 7.35 – 7.28 (m, 3 H), 7.13 (d, *J* = 7.9 Hz, 2 H), 7.05 (d, *J* = 6.5 Hz, 1 H), 6.88 (d, *J* = 8.1 Hz, 2 H), 2.60 (s, 12 H), 2.35 – 2.27 (m, 2 H), 2.02 – 1.98 (m, 2 H), 1.73 – 1.64 (m, 8 H), 1.50 (t, *J* = 15.7 Hz, 2 H), 1.29 – 1.02 (m, 6 H), 0.87 – 0.84 (m, 2 H); <sup>19</sup>F NMR (376 MHz, CDCl<sub>3</sub>) δ -61.87 (s); <sup>31</sup>P NMR (162 MHz, CDCl<sub>3</sub>) δ 26.63 (s) ppm. HRMS (ESI) calcd for [M-I]<sup>+</sup> C<sub>35</sub>H<sub>45</sub>F<sub>3</sub>N<sub>2</sub>PPd: 687.2307, found: 687.2289.

**General procedure for the synthesis of complex [(L)Pd(Ar)(OCF<sub>3</sub>)].** In an argon-filled glovebox, an oven-dried scintillation vial (10 mL) equipped with a magnetic stir bar was charged with complex [(L)Pd(Ar)(I)] (0.2 mmol, 1.0 equiv.). Toluene was then added dropwise by syringes with stirring until palladium complex was fully dissolved. A solution of AgOCF<sub>3</sub> in acetonitrile (1.0 M, 0.24 mL, 0.24 mmol, 1.2 eq) was added dropwise. The suspension was stirred rapidly for another 3.0 min. The mixture was filtered through a 0.22 μm microfiltration membrane<sup>®</sup> to a 50 mL round-bottom flask. The orange solution was then layered with n-pentane (30 mL). The solution was stored in a freezer for 12 h, and the resulted solid was collected, washed with n-pentane (10 mL × 3), dried under vacuum and stored in a freezer.

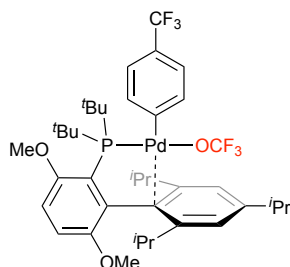

**[(*t*Bu-BrettPhos)Pd(4-CF<sub>3</sub>-Ph)(OCF<sub>3</sub>)] 5a.** Following the standard procedure, complex [(*t*Bu-BrettPhos)Pd(4-CF<sub>3</sub>-Ph)(I)] **4a** (173 mg, 0.200 mmol, 1.00 equiv.) in toluene (5.0 mL) was reacted with a solution of AgOCF<sub>3</sub> in acetonitrile (1.0 M, 0.24 mL, 0.24 mmol) to afford complex **5a** (64 mg, 39 %) as a bright yellow solid. <sup>1</sup>H NMR (600 MHz, C<sub>6</sub>D<sub>6</sub>) δ 7.58 (d, *J* = 7.0 Hz, 2 H), 7.40 (s, 2 H), 7.17 (d, *J* = 10.1 Hz, 2 H), 6.33 (d, *J* = 8.8 Hz, 1 H), 6.25 (d, *J* = 6.3 Hz, 1 H), 3.28 – 3.25 (m, 1 H), 3.02 (s, 3 H), 2.84 (s, 3 H), 2.68 (hept, *J* = 6.6 Hz, 1 H), 1.86 (d, *J* = 6.2 Hz, 6 H), 1.44 (d, *J* = 6.8 Hz, 6 H), 1.25 (s, 9 H), 1.22 (s, 9 H), 0.94 (d, *J* = 6.3 Hz, 6 H); <sup>19</sup>F NMR (565 MHz, C<sub>6</sub>D<sub>6</sub>, **298 K**) δ -27.29 (br, 3 F), -61.39 (s, 3 F); <sup>19</sup>F NMR (565 MHz, C<sub>6</sub>D<sub>6</sub>, **283 K**) δ -27.18 (s, 3 F), -61.29 (s, 3 F); <sup>31</sup>P NMR (243 MHz, C<sub>6</sub>D<sub>6</sub>) δ 77.30 (s) ppm. Anal. Calcd. for C<sub>39</sub>H<sub>53</sub>F<sub>6</sub>O<sub>3</sub>PPd: C, 57.04; H, 6.51; Found: C, 57.20; H, 6.66.

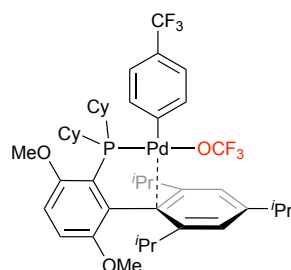

**[(BrettPhos)Pd(4-CF<sub>3</sub>-Ph)(OCF<sub>3</sub>)] 5b.** Following the standard procedure, complex **[(BrettPhos)Pd(4-CF<sub>3</sub>-Ph)(I)] 4b** (183 mg, 0.200 mmol, 1.00 equiv.) in toluene (6.0 mL) was reacted with a solution of AgOCF<sub>3</sub> in acetonitrile (1.0 M, 0.24 mL, 0.24 mmol) to afford the desired complex **5b** (88 mg, 51 %) as a bright yellow solid. The desired complex was obtained as a mixture of two rotamers *O*-bound and *C*-bound in a ratio of 5:1. <sup>1</sup>H NMR (600 MHz, C<sub>6</sub>D<sub>6</sub>, majority) δ 7.59 (d, *J* = 7.7 Hz, 2 H), 7.47 (s, 2 H), 7.29 – 7.25 (m, 2 H), 6.33 (d, *J* = 8.9 Hz, 1 H), 6.28 (dd, *J* = 8.9, 3.1 Hz, 1 H), 3.11 (s, 3 H), 2.85 (s, 3 H), complex spectrum due to its isomerization in solution; <sup>19</sup>F NMR (565 MHz, C<sub>6</sub>D<sub>6</sub>, 283 K) δ -28.01 (s, 3 F), -30.27 (s, 0.6 F), -61.32 (s, 3 F), -61.39 (s, 0.6 F); <sup>31</sup>P NMR (243 MHz, C<sub>6</sub>D<sub>6</sub>) δ 51.38 (s, 0.2 P), 42.42 (s, 1 P) ppm. Anal. Calcd. for C<sub>43</sub>H<sub>57</sub>F<sub>6</sub>O<sub>3</sub>PPd•(n-pentane)<sub>0.23</sub>: C, 59.59; H, 6.77; Found: C, 59.80; H, 6.83.

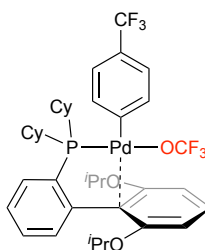

**[(RuPhos)Pd(4-CF<sub>3</sub>-Ph)(OCF<sub>3</sub>)] 5c.** Following the standard procedure, complex **[(RuPhos)Pd(4-CF<sub>3</sub>-Ph)(I)] 4c** (169 mg, 0.200 mmol, 1.00 equiv.) in toluene (5.0 mL) was reacted with a solution of AgOCF<sub>3</sub> in acetonitrile (1.0 M, 0.24 mL, 0.24 mmol) to afford the desired complex **5c** (71 mg, 44 %) as a white solid. <sup>1</sup>H NMR (600 MHz, C<sub>6</sub>D<sub>6</sub>) δ 7.73 (t, *J* = 8.5 Hz, 1 H), 7.53 (d, *J* = 7.4 Hz, 2 H), 7.25 (d, *J* = 5.5 Hz, 2 H), 7.18 (d, *J* = 7.6 Hz, 1 H), 7.07 (t, *J* = 7.5 Hz, 1 H), 6.94 (t, *J* = 7.6 Hz, 1 H), 6.70 (d, *J* = 7.6 Hz, 1 H), 6.57 (d, *J* = 5.2 Hz, 2 H), 4.30 – 4.26 (m, 2 H), 1.97 (q, *J* = 12.0 Hz, 2 H), 1.86 – 1.84 (m, 2 H), 1.61 – 1.54 (m, 6 H), 1.51 – 1.45 (m, 4 H), 1.32 (d, *J* = 5.5 Hz, 6 H), 1.10 – 1.03 (m, 2 H), 1.00 – 0.90 (m, 4 H), 0.80 (d, *J* = 6.1 Hz, 6 H), 0.77 –

0.70 (m, 2 H);  $^{19}\text{F}$  NMR (565 MHz,  $\text{C}_6\text{D}_6$ , **298 K**)  $\delta$  -27.52 (br, 3 F), -61.51 (s, 3 F);  $^{19}\text{F}$  NMR (565 MHz,  $\text{C}_6\text{D}_6$ , **283 K**)  $\delta$  -27.41 (s, 3 F), -61.38 (s, 3 F);  $^{31}\text{P}$  NMR (243 MHz,  $\text{C}_6\text{D}_6$ )  $\delta$  37.98 (s) ppm. Anal. Calcd. for  $\text{C}_{38}\text{H}_{47}\text{F}_6\text{O}_3\text{PPd}\cdot(\text{Toluene})_{0.16}(\text{n-pentane})_{0.4}$ : C, 58.33; H, 6.32; Found: C, 58.40; H, 6.44. The residual solvent was difficult to remove completely due to the weak coordination.

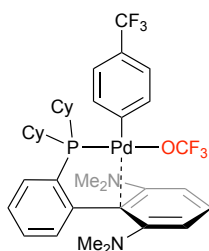

**[(CPhos)Pd(4-CF<sub>3</sub>-Ph)(OCF<sub>3</sub>)] 5d.** Following the standard procedure, complex **[(CPhos)Pd(4-CF<sub>3</sub>-Ph)(I)] 4d** (163 mg, 0.200 mmol, 1.00 equiv.) in toluene (3.0 mL) was reacted with a solution of  $\text{AgOCF}_3$  in acetonitrile (1.0 M, 0.24 mL, 0.24 mmol) to afford the desired complex **5d** (85 mg, 55 %) as a bright yellow solid.  $^1\text{H}$  NMR (400 MHz,  $\text{C}_6\text{D}_6$ )  $\delta$  7.77 – 7.62 (m, 1 H), 7.53 (d,  $J = 5.5$  Hz, 2 H), 7.28 – 7.23 (m, 3 H), 6.98 – 6.90 (m, 4 H), 6.85 – 6.80 (m, 1 H), 2.42 (s, 12 H), 2.16 – 2.09 (m, 2 H), 1.87 – 1.81 (m, 2 H), 1.64 – 1.61 (m, 2H), 1.57 – 1.40 (m, 6 H), 1.38 – 1.26 (m, 2H), 1.01 – 0.85 (m 6 H), 0.81 – 0.65 (m, 2 H);  $^{19}\text{F}$  NMR (376 MHz,  $\text{C}_6\text{D}_6$ )  $\delta$  -27.57 (s, 3 F), -61.54 (s, 3 F);  $^{31}\text{P}$  NMR (162 MHz,  $\text{C}_6\text{D}_6$ )  $\delta$  34.73 (s) ppm. Anal. Calcd. for  $\text{C}_{36}\text{H}_{45}\text{F}_6\text{N}_2\text{OPPd}$ : C, 55.93; H, 5.87; N, 3.62; Found: C, 56.16; H, 5.99; N, 3.83.

**Computational details.** DFT calculations were performed using Gaussian 16.<sup>5</sup> Geometry optimizations and frequencies were performed at the B3LYP-D3(BJ)<sup>6</sup>/6-31G(d,p)-LANL2DZ<sup>7</sup>(Pd) level of theory at 403.15 K. Frequency calculations confirmed that optimized structures are minima (no imaginary frequency) or transition structures (one imaginary frequency). To obtain more accurate electronic energies, single-point energy calculations were performed at the B97X-D<sup>8</sup>/6-311G(2d,p)-SDD<sup>9</sup>(Pd) level of theory with the optimized structures. The SMD<sup>10</sup> model was used to account for the solvation effects of toluene when calculating the single-point energies.

**B3LYP-D3(BJ)/6-31G(d,p)-LANL2DZ(Pd) calculated cartesian coordinates**

int1.log

|    |          |          |          |
|----|----------|----------|----------|
| Pd | 0.42764  | 0.18623  | 0.32692  |
| O  | 0.96319  | 2.12965  | 0.87045  |
| C  | 1.69041  | 2.91952  | 0.17067  |
| F  | 3.04743  | 2.78137  | 0.32779  |
| F  | 1.4926   | 2.82264  | -1.20379 |
| F  | 1.44717  | 4.2452   | 0.4653   |
| C  | 2.4098   | -0.10309 | 0.20584  |
| C  | 3.02065  | 0.02138  | -1.04609 |
| C  | 3.211    | -0.17813 | 1.34699  |
| C  | 4.40967  | 0.00543  | -1.16224 |
| H  | 2.42709  | 0.14825  | -1.9429  |
| C  | 4.60008  | -0.19943 | 1.23531  |
| H  | 2.76561  | -0.18928 | 2.33356  |
| C  | 5.20231  | -0.11916 | -0.02125 |
| H  | 4.87551  | 0.10416  | -2.13685 |
| H  | 5.21659  | -0.25479 | 2.12632  |
| C  | 6.69167  | -0.22015 | -0.14776 |
| F  | 7.15856  | 0.43678  | -1.23363 |
| F  | 7.33172  | 0.27759  | 0.93457  |
| F  | 7.09771  | -1.51088 | -0.27464 |
| P  | -0.25147 | -2.05562 | 0.06879  |
| C  | 0.49808  | -2.9061  | -1.4774  |
| C  | 0.03488  | -3.12853 | 1.65006  |
| C  | 0.35356  | -1.88854 | -2.62045 |
| H  | -0.69088 | -1.79001 | -2.92415 |
| H  | 0.72206  | -0.90252 | -2.34554 |
| H  | 0.92195  | -2.23925 | -3.489   |

|   |          |          |          |
|---|----------|----------|----------|
| C | 1.99326  | -3.17689 | -1.21661 |
| H | 2.14831  | -4.00044 | -0.51917 |
| H | 2.45947  | -3.46497 | -2.1657  |
| H | 2.52071  | -2.30284 | -0.84438 |
| C | -0.15805 | -4.21252 | -1.95237 |
| H | 0.38852  | -4.5477  | -2.84214 |
| H | -0.10956 | -5.00768 | -1.2111  |
| H | -1.19949 | -4.06383 | -2.23939 |
| C | 1.27895  | -2.56144 | 2.35031  |
| H | 1.47249  | -3.14439 | 3.25823  |
| H | 2.16928  | -2.6059  | 1.72162  |
| H | 1.12372  | -1.52081 | 2.63774  |
| C | -1.16582 | -2.9474  | 2.59237  |
| H | -2.0808  | -3.37765 | 2.18462  |
| H | -0.9435  | -3.45721 | 3.53681  |
| H | -1.33989 | -1.89803 | 2.82311  |
| C | 0.25726  | -4.63384 | 1.42529  |
| H | 0.39635  | -5.09844 | 2.40858  |
| H | -0.59468 | -5.10705 | 0.94711  |
| H | 1.15525  | -4.84448 | 0.84521  |
| C | -2.09544 | -1.9379  | -0.18782 |
| C | -2.70514 | -0.66802 | -0.23637 |
| C | -2.92293 | -3.08564 | -0.29717 |
| C | -4.10776 | -0.57422 | -0.4349  |
| C | -4.28758 | -2.97093 | -0.53471 |
| C | -4.88261 | -1.71318 | -0.60977 |
| H | -4.90719 | -3.85196 | -0.6383  |
| H | -5.94924 | -1.64346 | -0.78044 |
| C | -2.03543 | 0.66899  | -0.04682 |

|   |          |          |          |
|---|----------|----------|----------|
| C | -1.78691 | 1.48526  | -1.18956 |
| C | -2.1142  | 1.29277  | 1.23411  |
| C | -1.59965 | 2.85451  | -1.02691 |
| C | -1.91333 | 2.66651  | 1.33568  |
| C | -1.67272 | 3.47155  | 0.22232  |
| H | -1.39203 | 3.45418  | -1.90318 |
| H | -1.94741 | 3.13052  | 2.31661  |
| O | -2.3212  | -4.29607 | -0.11162 |
| O | -4.62328 | 0.69189  | -0.43132 |
| C | -3.06687 | -5.47875 | -0.3452  |
| H | -3.89852 | -5.57683 | 0.36265  |
| H | -3.45523 | -5.51061 | -1.3702  |
| H | -2.3707  | -6.30524 | -0.1971  |
| C | -6.01848 | 0.85208  | -0.62253 |
| H | -6.20258 | 1.92549  | -0.57507 |
| H | -6.33756 | 0.47234  | -1.6016  |
| H | -6.5934  | 0.34888  | 0.16522  |
| C | -1.79092 | 0.91174  | -2.59595 |
| H | -1.78016 | -0.17548 | -2.50486 |
| C | -0.55059 | 1.34162  | -3.39741 |
| H | -0.46551 | 0.74832  | -4.31374 |
| H | -0.61441 | 2.39372  | -3.69182 |
| H | 0.36318  | 1.2296   | -2.81175 |
| C | -3.07724 | 1.29548  | -3.35025 |
| H | -3.15097 | 2.3828   | -3.45654 |
| H | -3.07627 | 0.85699  | -4.35408 |
| H | -3.96671 | 0.95106  | -2.81949 |
| C | -2.49411 | 0.51541  | 2.4827   |
| H | -2.6013  | -0.53353 | 2.1995   |



|   |          |          |          |
|---|----------|----------|----------|
| C | -3.85998 | 0.97514  | 3.02152  |
| H | -4.1643  | 0.35932  | 3.87466  |
| H | -3.82147 | 2.01701  | 3.35535  |
| H | -4.62642 | 0.90111  | 2.24553  |
| C | -1.4031  | 0.61294  | 3.56108  |
| H | -1.28076 | 1.64242  | 3.91018  |
| H | -1.65688 | -0.00801 | 4.42716  |
| H | -0.43531 | 0.28925  | 3.1662   |
| C | -1.53039 | 4.97336  | 0.40434  |
| H | -0.8129  | 5.11555  | 1.2206   |
| C | -0.97971 | 5.70132  | -0.82564 |
| H | -1.68658 | 5.66522  | -1.66295 |
| H | -0.81044 | 6.75605  | -0.58818 |
| H | -0.03058 | 5.26721  | -1.14382 |
| C | -2.88023 | 5.57978  | 0.83398  |
| H | -3.26828 | 5.10576  | 1.74045  |
| H | -2.77684 | 6.65246  | 1.02825  |
| H | -3.62739 | 5.44873  | 0.04296  |

Zero-point correction= 0.856360 (Hartree/Particle)

Thermal correction to Energy= 0.952254

Thermal correction to Enthalpy= 0.953530

Thermal correction to Gibbs Free Energy= 0.710302

SP-E = -2812.18609175 hartree

int2.log

|    |         |         |          |
|----|---------|---------|----------|
| Pd | 0.51435 | 0.43556 | 0.32675  |
| C  | 2.49824 | 0.22246 | 0.19326  |
| C  | 3.10589 | 0.42202 | -1.05292 |
| C  | 3.31486 | 0.11059 | 1.32261  |

|   |          |          |          |
|---|----------|----------|----------|
| C | 4.49407  | 0.43977  | -1.17944 |
| H | 2.50203  | 0.56783  | -1.94143 |
| C | 4.70419  | 0.12567  | 1.20381  |
| H | 2.87709  | 0.02846  | 2.30961  |
| C | 5.29853  | 0.27851  | -0.05005 |
| H | 4.95172  | 0.58942  | -2.15176 |
| H | 5.32721  | 0.03499  | 2.08762  |
| C | 6.78757  | 0.21226  | -0.19016 |
| F | 7.2355   | 0.93607  | -1.24243 |
| F | 7.42661  | 0.66526  | 0.91336  |
| F | 7.22081  | -1.06043 | -0.38839 |
| P | -0.16823 | -1.7978  | 0.05525  |
| C | 0.57819  | -2.6107  | -1.51171 |
| C | 0.13633  | -2.90895 | 1.60337  |
| C | 0.40901  | -1.57253 | -2.63163 |
| H | -0.64224 | -1.45914 | -2.9058  |
| H | 0.79314  | -0.59686 | -2.34071 |
| H | 0.95309  | -1.908   | -3.52175 |
| C | 2.08187  | -2.8469  | -1.26814 |
| H | 2.26664  | -3.66522 | -0.57136 |
| H | 2.5458   | -3.12298 | -2.22207 |
| H | 2.58895  | -1.95777 | -0.90059 |
| C | -0.05621 | -3.92014 | -2.00624 |
| H | 0.492    | -4.2336  | -2.90308 |
| H | 0.00542  | -4.72653 | -1.27815 |
| H | -1.10106 | -3.78313 | -2.28716 |
| C | 1.38213  | -2.34011 | 2.30158  |
| H | 1.59066  | -2.93309 | 3.19982  |
| H | 2.26683  | -2.36672 | 1.66331  |

|   |          |          |          |
|---|----------|----------|----------|
| H | 1.22074  | -1.30382 | 2.60143  |
| C | -1.05779 | -2.76341 | 2.56009  |
| H | -1.96839 | -3.20237 | 2.15139  |
| H | -0.81994 | -3.28513 | 3.49437  |
| H | -1.24876 | -1.72144 | 2.80918  |
| C | 0.37183  | -4.4066  | 1.3453   |
| H | 0.53283  | -4.89076 | 2.31591  |
| H | -0.4839  | -4.87859 | 0.87175  |
| H | 1.26107  | -4.59632 | 0.74452  |
| C | -2.01581 | -1.68706 | -0.1968  |
| C | -2.6298  | -0.41737 | -0.22484 |
| C | -2.84029 | -2.83448 | -0.32138 |
| C | -4.03325 | -0.32433 | -0.40839 |
| C | -4.20739 | -2.71998 | -0.54662 |
| C | -4.8067  | -1.46271 | -0.59469 |
| H | -4.82547 | -3.60076 | -0.66157 |
| H | -5.87516 | -1.3937  | -0.75399 |
| C | -1.94665 | 0.90982  | -0.01974 |
| C | -1.68815 | 1.74975  | -1.14761 |
| C | -1.95349 | 1.49096  | 1.28091  |
| C | -1.37618 | 3.08557  | -0.94042 |
| C | -1.62827 | 2.84071  | 1.42677  |
| C | -1.31177 | 3.64608  | 0.33963  |
| H | -1.14535 | 3.7083   | -1.79791 |
| H | -1.591   | 3.27058  | 2.42279  |
| O | -2.23179 | -4.04619 | -0.16551 |
| O | -4.55288 | 0.9409   | -0.37593 |
| C | -2.97595 | -5.22648 | -0.41276 |
| H | -3.80019 | -5.3405  | 0.30155  |

|   |          |          |          |
|---|----------|----------|----------|
| H | -3.37513 | -5.24123 | -1.4341  |
| H | -2.27574 | -6.05331 | -0.28711 |
| C | -5.95211 | 1.09679  | -0.5388  |
| H | -6.1418  | 2.16795  | -0.46692 |
| H | -6.28719 | 0.73463  | -1.51926 |
| H | -6.50977 | 0.57451  | 0.24896  |
| C | -1.77574 | 1.22507  | -2.57101 |
| H | -1.80993 | 0.13511  | -2.5167  |
| C | -0.55059 | 1.62623  | -3.40997 |
| H | -0.52525 | 1.05957  | -4.34646 |
| H | -0.57899 | 2.68884  | -3.6708  |
| H | 0.3793   | 1.4481   | -2.8656  |
| C | -3.06976 | 1.69477  | -3.26045 |
| H | -3.09309 | 2.78775  | -3.32633 |
| H | -3.12989 | 1.29298  | -4.27786 |
| H | -3.95273 | 1.37569  | -2.70457 |
| C | -2.37584 | 0.7055   | 2.51088  |
| H | -2.51905 | -0.33372 | 2.2083   |
| C | -3.7298  | 1.21164  | 3.0389   |
| H | -4.0671  | 0.60061  | 3.88316  |
| H | -3.65284 | 2.24858  | 3.38182  |
| H | -4.48944 | 1.17459  | 2.25387  |
| C | -1.29916 | 0.74125  | 3.60714  |
| H | -1.16322 | 1.75315  | 4.00006  |
| H | -1.57756 | 0.09298  | 4.44503  |
| H | -0.33309 | 0.41346  | 3.21196  |
| C | -0.89237 | 5.08856  | 0.53237  |
| H | -0.86327 | 5.27383  | 1.61359  |
| C | 0.52361  | 5.32214  | -0.02334 |

|                                          |                        |         |                             |
|------------------------------------------|------------------------|---------|-----------------------------|
| H                                        | 0.52507                | 5.26129 | -1.11767                    |
| H                                        | 0.88494                | 6.31829 | 0.25433                     |
| H                                        | 1.20285                | 4.55429 | 0.35105                     |
| C                                        | -1.91218               | 6.0595  | -0.08599                    |
| H                                        | -2.91029               | 5.91568 | 0.34039                     |
| H                                        | -1.61067               | 7.09793 | 0.08749                     |
| H                                        | -1.98647               | 5.91188 | -1.16901                    |
| F                                        | 1.08606                | 2.31504 | 0.61944                     |
| Zero-point correction=                   |                        |         | 0.839244 (Hartree/Particle) |
| Thermal correction to Energy=            |                        |         | 0.929162                    |
| Thermal correction to Enthalpy=          |                        |         | 0.930438                    |
| Thermal correction to Gibbs Free Energy= |                        |         | 0.700025                    |
| SP-E =                                   | -2499.13354140 hartree |         |                             |

COF2.log

|                                          |                        |          |                             |
|------------------------------------------|------------------------|----------|-----------------------------|
| C                                        | 0.                     | 0.14302  | 0.                          |
| O                                        | -0.00007               | 1.32317  | 0.                          |
| F                                        | -1.06862               | -0.6358  | 0.                          |
| F                                        | 1.06868                | -0.63569 | 0.                          |
| Zero-point correction=                   |                        |          | 0.014136 (Hartree/Particle) |
| Thermal correction to Energy=            |                        |          | 0.019161                    |
| Thermal correction to Enthalpy=          |                        |          | 0.020437                    |
| Thermal correction to Gibbs Free Energy= |                        |          | -0.022606                   |
| SP-E =                                   | -313.022909842 hartree |          |                             |

LnPd.log

|    |          |          |          |
|----|----------|----------|----------|
| Pd | 0.48751  | -1.7759  | 0.38634  |
| P  | -1.58978 | -0.99916 | -0.23316 |
| C  | -2.0146  | -1.29514 | -2.06705 |

|   |          |          |          |
|---|----------|----------|----------|
| C | -2.97196 | -1.6795  | 0.92639  |
| C | -0.7974  | -0.74957 | -2.83022 |
| H | -0.7159  | 0.3339   | -2.7159  |
| H | 0.12935  | -1.20019 | -2.46397 |
| H | -0.90083 | -0.97063 | -3.89953 |
| C | -2.07549 | -2.81932 | -2.27348 |
| H | -2.95036 | -3.26909 | -1.79735 |
| H | -2.13452 | -3.03869 | -3.34634 |
| H | -1.18002 | -3.30291 | -1.8709  |
| C | -3.27518 | -0.63464 | -2.6429  |
| H | -3.35861 | -0.90548 | -3.7034  |
| H | -4.18767 | -0.95668 | -2.14243 |
| H | -3.2175  | 0.45306  | -2.58016 |
| C | -2.48357 | -3.0863  | 1.33922  |
| H | -3.19614 | -3.52013 | 2.05229  |
| H | -2.41196 | -3.75956 | 0.48086  |
| H | -1.49495 | -3.04221 | 1.80361  |
| C | -3.01189 | -0.79979 | 2.18697  |
| H | -3.43606 | 0.18412  | 1.9831   |
| H | -3.63421 | -1.28782 | 2.94693  |
| H | -2.01377 | -0.66855 | 2.6122   |
| C | -4.38848 | -1.83989 | 0.35382  |
| H | -5.0334  | -2.269   | 1.13111  |
| H | -4.8169  | -0.8919  | 0.04405  |
| H | -4.41028 | -2.52866 | -0.49398 |
| C | -1.50071 | 0.88176  | -0.04981 |
| C | -0.25513 | 1.53768  | 0.16777  |
| C | -2.66902 | 1.68364  | -0.07441 |
| C | -0.24008 | 2.93073  | 0.41996  |

|   |          |          |          |
|---|----------|----------|----------|
| C | -2.62107 | 3.05999  | 0.1233   |
| C | -1.40542 | 3.68593  | 0.38306  |
| H | -3.52296 | 3.65737  | 0.09618  |
| H | -1.38888 | 4.75378  | 0.55885  |
| C | 1.07841  | 0.84195  | 0.1666   |
| C | 1.96429  | 0.93991  | -0.91796 |
| C | 1.4271   | 0.03669  | 1.30989  |
| C | 3.14168  | 0.1625   | -0.91612 |
| C | 2.59616  | -0.76318 | 1.23626  |
| C | 3.44709  | -0.72027 | 0.11092  |
| H | 3.80954  | 0.23188  | -1.76765 |
| H | 2.90981  | -1.32775 | 2.10862  |
| O | -3.85402 | 1.03395  | -0.28687 |
| O | 0.98539  | 3.47075  | 0.71801  |
| C | -5.03546 | 1.79723  | -0.44266 |
| H | -5.28705 | 2.34841  | 0.47213  |
| H | -4.95076 | 2.5033   | -1.278   |
| H | -5.8294  | 1.08024  | -0.65689 |
| C | 1.04912  | 4.8521   | 1.02469  |
| H | 2.09563  | 5.05943  | 1.25124  |
| H | 0.73484  | 5.47084  | 0.17425  |
| H | 0.43265  | 5.09998  | 1.89821  |
| C | 1.72262  | 1.86421  | -2.10683 |
| H | 0.67747  | 2.18975  | -2.07482 |
| C | 1.96944  | 1.19083  | -3.46956 |
| H | 1.62181  | 1.8428   | -4.27823 |
| H | 3.03706  | 1.01452  | -3.63601 |
| H | 1.45738  | 0.23261  | -3.55741 |
| C | 2.61497  | 3.11741  | -2.00591 |

|                                          |          |          |                             |
|------------------------------------------|----------|----------|-----------------------------|
| H                                        | 3.67143  | 2.83434  | -2.07126                    |
| H                                        | 2.40255  | 3.81108  | -2.82767                    |
| H                                        | 2.461    | 3.63206  | -1.05849                    |
| C                                        | 0.77567  | 0.30748  | 2.66629                     |
| H                                        | -0.24362 | 0.65472  | 2.47534                     |
| C                                        | 1.53525  | 1.44724  | 3.37254                     |
| H                                        | 1.04116  | 1.71658  | 4.31293                     |
| H                                        | 2.55902  | 1.13343  | 3.6054                      |
| H                                        | 1.58988  | 2.33283  | 2.73664                     |
| C                                        | 0.68651  | -0.92073 | 3.57972                     |
| H                                        | 1.67728  | -1.26474 | 3.89501                     |
| H                                        | 0.12461  | -0.67565 | 4.48741                     |
| H                                        | 0.18624  | -1.74964 | 3.06896                     |
| C                                        | 4.64884  | -1.64503 | 0.03846                     |
| H                                        | 4.77164  | -2.09637 | 1.03197                     |
| C                                        | 4.38614  | -2.78696 | -0.96048                    |
| H                                        | 4.25223  | -2.38894 | -1.97204                    |
| H                                        | 5.22233  | -3.49496 | -0.98027                    |
| H                                        | 3.47476  | -3.33136 | -0.69363                    |
| C                                        | 5.95083  | -0.90352 | -0.30078                    |
| H                                        | 6.1407   | -0.09327 | 0.40958                     |
| H                                        | 6.80365  | -1.59035 | -0.27612                    |
| H                                        | 5.91018  | -0.46598 | -1.30367                    |
| Zero-point correction=                   |          |          | 0.738946 (Hartree/Particle) |
| Thermal correction to Energy=            |          |          | 0.811364                    |
| Thermal correction to Enthalpy=          |          |          | 0.812640                    |
| Thermal correction to Gibbs Free Energy= |          |          | 0.622209                    |
| SP-E = -1830.56575062 hartree            |          |          |                             |



phf.log

|                                          |                        |          |                             |
|------------------------------------------|------------------------|----------|-----------------------------|
| C                                        | -2.39643               | 0.       | 0.00371                     |
| C                                        | -1.73038               | -1.21976 | -0.00567                    |
| C                                        | -0.33819               | -1.21384 | -0.02464                    |
| C                                        | 0.35541                | -0.00003 | -0.03671                    |
| C                                        | -0.33817               | 1.21381  | -0.02464                    |
| C                                        | -1.73036               | 1.21976  | -0.00567                    |
| H                                        | -2.29459               | -2.14529 | -0.00129                    |
| H                                        | 0.20469                | -2.152   | -0.0355                     |
| H                                        | 0.20474                | 2.15196  | -0.03552                    |
| H                                        | -2.29454               | 2.1453   | -0.00129                    |
| C                                        | 1.85325                | -0.00001 | -0.00147                    |
| F                                        | 2.33542                | 0.00038  | 1.26862                     |
| F                                        | 2.37975                | 1.08895  | -0.6087                     |
| F                                        | 2.37979                | -1.0893  | -0.60807                    |
| F                                        | -3.74731               | 0.00002  | 0.01972                     |
| Zero-point correction=                   |                        |          | 0.097033 (Hartree/Particle) |
| Thermal correction to Energy=            |                        |          | 0.110097                    |
| Thermal correction to Enthalpy=          |                        |          | 0.111279                    |
| Thermal correction to Gibbs Free Energy= |                        |          | 0.049558                    |
| SP-E =                                   | -668.533149047 hartree |          |                             |

TS1.log

|    |          |          |          |
|----|----------|----------|----------|
| Pd | -0.30921 | -0.45829 | 0.51118  |
| P  | -0.31623 | 1.86687  | 0.22934  |
| C  | -1.45753 | 2.39063  | -1.21386 |
| C  | -0.78673 | 2.83053  | 1.83541  |
| C  | -1.11081 | 1.44341  | -2.37284 |
| H  | -0.09487 | 1.6152   | -2.73585 |

|   |          |         |          |
|---|----------|---------|----------|
| H | -1.20322 | 0.39984 | -2.07447 |
| H | -1.80026 | 1.62525 | -3.20541 |
| C | -2.90401 | 2.10829 | -0.76451 |
| H | -3.27984 | 2.86339 | -0.07279 |
| H | -3.56318 | 2.11401 | -1.63887 |
| H | -3.00027 | 1.1344  | -0.29303 |
| C | -1.35512 | 3.82868 | -1.7416  |
| H | -2.09842 | 3.94573 | -2.54005 |
| H | -1.56179 | 4.5778  | -0.97946 |
| H | -0.37186 | 4.03194 | -2.16904 |
| C | -1.73865 | 1.90567 | 2.61687  |
| H | -2.00834 | 2.38685 | 3.56482  |
| H | -2.65868 | 1.70166 | 2.06676  |
| H | -1.26511 | 0.94584 | 2.83479  |
| C | 0.4819   | 3.03934 | 2.67668  |
| H | 1.18518  | 3.72166 | 2.19699  |
| H | 0.19532  | 3.47242 | 3.64222  |
| H | 0.9893   | 2.0974  | 2.88009  |
| C | -1.48347 | 4.19004 | 1.65863  |
| H | -1.70232 | 4.58991 | 2.6563   |
| H | -0.8526  | 4.90555 | 1.13935  |
| H | -2.43472 | 4.10875 | 1.13275  |
| C | 1.44257  | 2.32411 | -0.21188 |
| C | 2.42431  | 1.31328 | -0.33541 |
| C | 1.84841  | 3.67245 | -0.38047 |
| C | 3.7641   | 1.67684 | -0.63088 |
| C | 3.15691  | 4.0026  | -0.71485 |
| C | 4.11871  | 3.00292 | -0.84119 |
| H | 3.44992  | 5.03447 | -0.85788 |

|   |          |          |          |
|---|----------|----------|----------|
| H | 5.13669  | 3.27821  | -1.08523 |
| C | 2.23188  | -0.17196 | -0.15239 |
| C | 2.14298  | -1.01554 | -1.29146 |
| C | 2.48128  | -0.75881 | 1.11745  |
| C | 2.29687  | -2.39462 | -1.13839 |
| C | 2.60337  | -2.14858 | 1.21616  |
| C | 2.54092  | -2.98533 | 0.10225  |
| H | 2.22811  | -3.02202 | -2.01847 |
| H | 2.78742  | -2.59074 | 2.19119  |
| O | 0.89757  | 4.62643  | -0.16049 |
| O | 4.66308  | 0.64445  | -0.68286 |
| C | 1.20204  | 5.97994  | -0.44709 |
| H | 1.99671  | 6.36227  | 0.20513  |
| H | 1.49804  | 6.11043  | -1.49502 |
| H | 0.28438  | 6.53892  | -0.25953 |
| C | 6.01923  | 0.94886  | -0.95869 |
| H | 6.54779  | -0.00455 | -0.9375  |
| H | 6.13737  | 1.40619  | -1.94954 |
| H | 6.44493  | 1.61772  | -0.19982 |
| C | 1.94739  | -0.45568 | -2.69179 |
| H | 1.65747  | 0.59257  | -2.58957 |
| C | 0.83205  | -1.18712 | -3.45668 |
| H | 0.58358  | -0.64897 | -4.37718 |
| H | 1.14018  | -2.19828 | -3.74064 |
| H | -0.07199 | -1.27509 | -2.85144 |
| C | 3.25987  | -0.49559 | -3.49591 |
| H | 3.59924  | -1.52885 | -3.62618 |
| H | 3.11471  | -0.0599  | -4.49048 |
| H | 4.05224  | 0.05317  | -2.98435 |

|   |          |          |          |
|---|----------|----------|----------|
| C | 2.7366   | 0.08576  | 2.35544  |
| H | 2.51473  | 1.12285  | 2.0969   |
| C | 4.2233   | 0.02598  | 2.74941  |
| H | 4.42696  | 0.69522  | 3.59236  |
| H | 4.50794  | -0.98874 | 3.04727  |
| H | 4.85732  | 0.31757  | 1.90831  |
| C | 1.83124  | -0.31648 | 3.52938  |
| H | 2.05003  | -1.3315  | 3.87516  |
| H | 1.97537  | 0.3607   | 4.37809  |
| H | 0.77821  | -0.28801 | 3.23277  |
| C | 2.81352  | -4.47202 | 0.26988  |
| H | 2.30641  | -4.78504 | 1.19011  |
| C | 2.28203  | -5.34309 | -0.87326 |
| H | 2.82457  | -5.15361 | -1.80641 |
| H | 2.41719  | -6.40158 | -0.63034 |
| H | 1.22044  | -5.16358 | -1.04977 |
| C | 4.32571  | -4.69918 | 0.46246  |
| H | 4.71187  | -4.12314 | 1.3087   |
| H | 4.54121  | -5.75822 | 0.64083  |
| H | 4.8749   | -4.38587 | -0.43254 |
| C | -2.26673 | -1.2593  | 0.46792  |
| C | -2.74458 | -1.4662  | -0.84509 |
| C | -4.06479 | -1.15862 | -1.14454 |
| C | -4.94092 | -0.71055 | -0.15153 |
| C | -4.48683 | -0.6222  | 1.17387  |
| C | -3.17656 | -0.93305 | 1.49588  |
| H | -2.07984 | -1.82724 | -1.61766 |
| H | -4.41598 | -1.25862 | -2.16616 |
| H | -5.17219 | -0.31144 | 1.95543  |

|                                          |                |          |                             |
|------------------------------------------|----------------|----------|-----------------------------|
| H                                        | -2.83021       | -0.88879 | 2.52063                     |
| C                                        | -6.29786       | -0.21842 | -0.51815                    |
| F                                        | -6.28158       | 1.10456  | -0.85386                    |
| F                                        | -7.18485       | -0.33722 | 0.49771                     |
| F                                        | -6.81369       | -0.86916 | -1.58761                    |
| O                                        | -1.14108       | -2.42771 | 1.06852                     |
| C                                        | -1.05507       | -3.57942 | 0.41665                     |
| F                                        | -0.55658       | -3.45774 | -0.85016                    |
| F                                        | -2.24461       | -4.20631 | 0.2943                      |
| F                                        | -0.22812       | -4.4193  | 1.0808                      |
| Zero-point correction=                   |                |          | 0.854155 (Hartree/Particle) |
| Thermal correction to Energy=            |                |          | 0.949563                    |
| Thermal correction to Enthalpy=          |                |          | 0.950839                    |
| Thermal correction to Gibbs Free Energy= |                |          | 0.709177                    |
| SP-E =                                   | -2812.13102136 | hartree  |                             |

TS2.log

|    |          |          |          |
|----|----------|----------|----------|
| Pd | -0.42946 | 0.18716  | -0.29143 |
| O  | -1.03181 | 1.46198  | -2.29093 |
| C  | -1.53051 | 2.47431  | -1.76274 |
| F  | -2.88143 | 2.67239  | -1.89863 |
| F  | -1.37571 | 2.43629  | -0.28259 |
| F  | -0.96945 | 3.70099  | -2.0706  |
| C  | -2.36926 | -0.22002 | -0.01646 |
| C  | -2.85836 | -0.19016 | 1.29272  |
| C  | -3.26811 | -0.24149 | -1.08482 |
| C  | -4.23162 | -0.22403 | 1.53663  |
| H  | -2.18657 | -0.14312 | 2.1392   |
| C  | -4.64021 | -0.28668 | -0.84092 |

|   |          |          |          |
|---|----------|----------|----------|
| H | -2.91127 | -0.16367 | -2.10102 |
| C | -5.12511 | -0.28844 | 0.46775  |
| H | -4.60326 | -0.19777 | 2.55538  |
| H | -5.3349  | -0.29355 | -1.67402 |
| C | -6.59613 | -0.41562 | 0.72648  |
| F | -6.96279 | 0.18021  | 1.8844   |
| F | -7.33788 | 0.12824  | -0.26328 |
| F | -6.97539 | -1.71589 | 0.82507  |
| P | 0.34153  | -1.99846 | -0.18917 |
| C | -0.31862 | -3.10474 | 1.22911  |
| C | 0.09393  | -2.83234 | -1.91128 |
| C | -0.16623 | -2.27035 | 2.51077  |
| H | 0.88756  | -2.15619 | 2.77701  |
| H | -0.60077 | -1.27927 | 2.40925  |
| H | -0.66806 | -2.78449 | 3.33796  |
| C | -1.80742 | -3.40571 | 0.97069  |
| H | -1.94856 | -4.08524 | 0.12914  |
| H | -2.21798 | -3.89836 | 1.85937  |
| H | -2.39149 | -2.50785 | 0.78957  |
| C | 0.41116  | -4.43713 | 1.47202  |
| H | -0.09798 | -4.93927 | 2.30336  |
| H | 0.38417  | -5.10308 | 0.61214  |
| H | 1.44962  | -4.28346 | 1.76623  |
| C | -1.20297 | -2.26164 | -2.50788 |
| H | -1.36211 | -2.71679 | -3.49231 |
| H | -2.07561 | -2.48314 | -1.89098 |
| H | -1.13631 | -1.18035 | -2.63675 |
| C | 1.25652  | -2.40182 | -2.81844 |
| H | 2.21914  | -2.77876 | -2.47056 |

|   |          |          |          |
|---|----------|----------|----------|
| H | 1.07776  | -2.8033  | -3.82235 |
| H | 1.30409  | -1.31747 | -2.90868 |
| C | -0.01182 | -4.36622 | -1.91311 |
| H | -0.15265 | -4.68574 | -2.95211 |
| H | 0.88649  | -4.84274 | -1.53328 |
| H | -0.87351 | -4.72719 | -1.35063 |
| C | 2.16951  | -1.79564 | 0.13029  |
| C | 2.69479  | -0.52225 | 0.43572  |
| C | 3.05838  | -2.90103 | 0.10222  |
| C | 4.05987  | -0.40372 | 0.80214  |
| C | 4.38519  | -2.76778 | 0.49543  |
| C | 4.88465  | -1.51984 | 0.86105  |
| H | 5.04964  | -3.62179 | 0.49949  |
| H | 5.92321  | -1.43256 | 1.15315  |
| C | 1.97356  | 0.7929   | 0.2992   |
| C | 1.56834  | 1.51521  | 1.4649   |
| C | 2.084    | 1.48909  | -0.94007 |
| C | 1.23963  | 2.85911  | 1.34936  |
| C | 1.72245  | 2.84106  | -0.99461 |
| C | 1.30499  | 3.54325  | 0.12823  |
| H | 0.91962  | 3.39583  | 2.23567  |
| H | 1.76515  | 3.3562   | -1.94665 |
| O | 2.55675  | -4.07893 | -0.36814 |
| O | 4.49679  | 0.86563  | 1.06096  |
| C | 3.35689  | -5.24697 | -0.29085 |
| H | 4.2552   | -5.16    | -0.91312 |
| H | 3.64886  | -5.46386 | 0.74371  |
| H | 2.73619  | -6.06023 | -0.66882 |
| C | 5.8676   | 1.05714  | 1.36915  |

|   |          |          |          |
|---|----------|----------|----------|
| H | 5.99245  | 2.131    | 1.50877  |
| H | 6.15053  | 0.53622  | 2.29268  |
| H | 6.51369  | 0.71867  | 0.54941  |
| C | 1.52673  | 0.86336  | 2.83799  |
| H | 1.64301  | -0.21258 | 2.69435  |
| C | 0.18609  | 1.11079  | 3.54922  |
| H | 0.09254  | 0.46604  | 4.42922  |
| H | 0.10328  | 2.14723  | 3.891    |
| H | -0.65732 | 0.92317  | 2.88269  |
| C | 2.68762  | 1.34265  | 3.72867  |
| H | 2.62339  | 2.42337  | 3.89384  |
| H | 2.64652  | 0.84953  | 4.70599  |
| H | 3.65293  | 1.1315   | 3.26791  |
| C | 2.73007  | 0.86059  | -2.16666 |
| H | 2.75602  | -0.21927 | -2.01311 |
| C | 4.19147  | 1.33523  | -2.29056 |
| H | 4.675    | 0.85215  | -3.14644 |
| H | 4.22872  | 2.41832  | -2.4474  |
| H | 4.76609  | 1.1087   | -1.39058 |
| C | 1.96354  | 1.1455   | -3.46793 |
| H | 2.0844   | 2.18895  | -3.7766  |
| H | 2.36125  | 0.52262  | -4.2765  |
| H | 0.89271  | 0.96903  | -3.35321 |
| C | 0.97819  | 5.02101  | 0.03656  |
| H | 0.87634  | 5.25842  | -1.02751 |
| C | -0.34952 | 5.38115  | 0.71898  |
| H | -0.29858 | 5.22884  | 1.80293  |
| H | -0.58397 | 6.43703  | 0.54878  |
| H | -1.16046 | 4.77     | 0.32323  |



|                                          |         |         |                             |
|------------------------------------------|---------|---------|-----------------------------|
| C                                        | 2.14228 | 5.85128 | 0.60778                     |
| H                                        | 3.08086 | 5.62823 | 0.09037                     |
| H                                        | 1.93978 | 6.92285 | 0.50699                     |
| H                                        | 2.28771 | 5.63515 | 1.67235                     |
| Zero-point correction=                   |         |         | 0.855131 (Hartree/Particle) |
| Thermal correction to Energy=            |         |         | 0.950603                    |
| Thermal correction to Enthalpy=          |         |         | 0.951879                    |
| Thermal correction to Gibbs Free Energy= |         |         | 0.710264                    |
| SP-E = -2812.16766748 hartree            |         |         |                             |

TS3.log

|    |          |         |          |
|----|----------|---------|----------|
| Pd | -0.35734 | -0.6131 | 0.69834  |
| P  | -0.09747 | 1.64511 | 0.22105  |
| C  | -1.21938 | 2.21698 | -1.2161  |
| C  | -0.38748 | 2.7374  | 1.78309  |
| C  | -1.00863 | 1.18306 | -2.33138 |
| H  | 0.01198  | 1.21813 | -2.71897 |
| H  | -1.21649 | 0.17471 | -1.97645 |
| H  | -1.69148 | 1.40189 | -3.16037 |
| C  | -2.67563 | 2.11267 | -0.72191 |
| H  | -2.93626 | 2.91231 | -0.02637 |
| H  | -3.35211 | 2.19361 | -1.57954 |
| H  | -2.87561 | 1.15918 | -0.23942 |
| C  | -0.97519 | 3.60958 | -1.81469 |
| H  | -1.72453 | 3.77244 | -2.59915 |
| H  | -1.07497 | 4.41094 | -1.08483 |
| H  | 0.01153  | 3.68263 | -2.27468 |
| C  | -1.42265 | 1.98106 | 2.63802  |
| H  | -1.60456 | 2.54448 | 3.56118  |

|   |          |          |          |
|---|----------|----------|----------|
| H | -2.37555 | 1.8618   | 2.11934  |
| H | -1.06506 | 0.98283  | 2.90029  |
| C | 0.92909  | 2.81947  | 2.57157  |
| H | 1.68416  | 3.40616  | 2.0461   |
| H | 0.73309  | 3.30438  | 3.53506  |
| H | 1.33707  | 1.83064  | 2.77978  |
| C | -0.9156  | 4.16292  | 1.55313  |
| H | -1.04547 | 4.63842  | 2.53297  |
| H | -0.22179 | 4.76586  | 0.97453  |
| H | -1.88941 | 4.17343  | 1.06222  |
| C | 1.693    | 1.85303  | -0.29486 |
| C | 2.54089  | 0.72291  | -0.38717 |
| C | 2.25865  | 3.13018  | -0.53768 |
| C | 3.90931  | 0.90154  | -0.70901 |
| C | 3.59342  | 3.27815  | -0.89941 |
| C | 4.42314  | 2.16241  | -0.9835  |
| H | 4.00937  | 4.25756  | -1.09641 |
| H | 5.46397  | 2.29794  | -1.24789 |
| C | 2.13321  | -0.70808 | -0.14979 |
| C | 1.81732  | -1.55129 | -1.25328 |
| C | 2.27421  | -1.28028 | 1.14167  |
| C | 1.56308  | -2.90095 | -1.02096 |
| C | 2.00978  | -2.64851 | 1.31411  |
| C | 1.62761  | -3.46784 | 0.25764  |
| H | 1.29503  | -3.53328 | -1.86026 |
| H | 2.08471  | -3.07778 | 2.30823  |
| O | 1.43518  | 4.20404  | -0.36226 |
| O | 4.67061  | -0.23787 | -0.71985 |
| C | 1.90271  | 5.49474  | -0.71278 |

|   |          |          |          |
|---|----------|----------|----------|
| H | 2.74483  | 5.80446  | -0.08194 |
| H | 2.20264  | 5.53924  | -1.76671 |
| H | 1.06322  | 6.17131  | -0.54806 |
| C | 6.05138  | -0.11739 | -1.01781 |
| H | 6.45811  | -1.1271  | -0.9559  |
| H | 6.21293  | 0.27664  | -2.02938 |
| H | 6.56471  | 0.52686  | -0.29285 |
| C | 1.79629  | -1.03251 | -2.68407 |
| H | 1.70795  | 0.0561   | -2.63985 |
| C | 0.61484  | -1.57701 | -3.50337 |
| H | 0.52635  | -1.03063 | -4.44779 |
| H | 0.75607  | -2.63336 | -3.75325 |
| H | -0.32937 | -1.48423 | -2.96419 |
| C | 3.11893  | -1.36272 | -3.4028  |
| H | 3.25052  | -2.44798 | -3.47349 |
| H | 3.11497  | -0.95512 | -4.41965 |
| H | 3.97537  | -0.95795 | -2.86321 |
| C | 2.78638  | -0.47551 | 2.32755  |
| H | 2.77879  | 0.57838  | 2.03872  |
| C | 4.24582  | -0.85485 | 2.63834  |
| H | 4.64219  | -0.23256 | 3.44806  |
| H | 4.31478  | -1.90198 | 2.95211  |
| H | 4.87529  | -0.7265  | 1.75493  |
| C | 1.90084  | -0.63236 | 3.57346  |
| H | 1.94482  | -1.65035 | 3.97258  |
| H | 2.23161  | 0.04675  | 4.36635  |
| H | 0.85453  | -0.41519 | 3.33865  |
| C | 1.27944  | -4.92683 | 0.47882  |
| H | 1.32088  | -5.10755 | 1.5604   |

|                                          |          |          |                             |
|------------------------------------------|----------|----------|-----------------------------|
| C                                        | -0.15359 | -5.23062 | 0.00717                     |
| H                                        | -0.2306  | -5.15057 | -1.0833                     |
| H                                        | -0.44079 | -6.25076 | 0.28345                     |
| H                                        | -0.85819 | -4.52201 | 0.44737                     |
| C                                        | 2.30259  | -5.85622 | -0.1957                     |
| H                                        | 3.3162   | -5.66414 | 0.17018                     |
| H                                        | 2.05945  | -6.90614 | -0.00115                    |
| H                                        | 2.30589  | -5.71077 | -1.28159                    |
| C                                        | -2.33839 | -1.17752 | 0.64252                     |
| C                                        | -2.78161 | -1.53022 | -0.6501                     |
| C                                        | -4.08402 | -1.2412  | -1.02877                    |
| C                                        | -4.9825  | -0.67105 | -0.1172                     |
| C                                        | -4.56658 | -0.44088 | 1.20143                     |
| C                                        | -3.26586 | -0.72061 | 1.59789                     |
| H                                        | -2.09005 | -1.99285 | -1.34488                    |
| H                                        | -4.41129 | -1.45893 | -2.04026                    |
| H                                        | -5.26946 | -0.03172 | 1.91983                     |
| H                                        | -2.94851 | -0.54164 | 2.61735                     |
| C                                        | -6.32226 | -0.21396 | -0.57784                    |
| F                                        | -6.28234 | 1.05129  | -1.08866                    |
| F                                        | -7.23451 | -0.18515 | 0.423                       |
| F                                        | -6.82643 | -0.99604 | -1.56329                    |
| F                                        | -1.34376 | -2.4443  | 1.26029                     |
| Zero-point correction=                   |          |          | 0.837414 (Hartree/Particle) |
| Thermal correction to Energy=            |          |          | 0.926622                    |
| Thermal correction to Enthalpy=          |          |          | 0.927898                    |
| Thermal correction to Gibbs Free Energy= |          |          | 0.700553                    |
| SP-E = -2499.09196060 hartree            |          |          |                             |

## Reference

1. de Graaf, W.; Boersma, J.; Smeets, W. J. J.; Spek, A. L.; van Koten, G. *Organometallics* **1989**, *8*, 2907
2. Ball, N. D.; Gary, J. B.; Ye, Y. D.; Sanford, M. S. *J. Am. Chem. Soc.* **2011**, *133*, 7577.
3. Maleckis, A.; Sanford, M. S. *Organometallics* **2011**, *30*, 6617.
4. Vinogradova, E.; Zhang, C.; Spokoyny, A.; Pentelute1, B. L.; Buchwald, S. L. *Nature* **2015**, *526*, 687.
5. Frisch, M. J.; Trucks, G. W.; Schlegel, H. B.; Scuseria, G. E.; Robb, M. A.; Cheeseman, J. R.; Scalmani, G.; Barone, V.; Petersson, G. A.; Nakatsuji, H.; Li, X.; Caricato, M.; Marenich, A. V.; Bloino, J.; Janesko, B. G.; Gomperts, R.; Mennucci, B.; Hratchian, H. P.; Ortiz, J. V.; Izmaylov, A. F.; Sonnenberg, J. L.; Williams-Young, D.; Ding, F.; Lipparini, F.; Egidi, F.; Goings, J.; Peng, B.; Petrone, A.; Henderson, T.; Ranasinghe, D.; Zakrzewski, V. G.; Gao, J.; Rega, N.; Zheng, G.; Liang, W.; Hada, M.; Ehara, M.; Toyota, K.; Fukuda, R.; Hasegawa, J.; Ishida, M.; Nakajima, T.; Honda, Y.; Kitao, O.; Nakai, H.; Vreven, T.; Throssell, K.; Montgomery, Jr., J. A.; Peralta, J. E.; Ogliaro, F.; Bearpark, M. J.; Heyd, J. J.; Brothers, E. N.; Kudin, K. N.; Staroverov, V. N.; Keith, T. A.; Kobayashi, R.; Normand, J.; Raghavachari, K.; Rendell, A. P.; Burant, J. C.; Iyengar, S. S.; Tomasi, J.; Cossi, M.; Millam, J. M.; Klene, M.; Adamo, C.; Cammi, R.; Ochterski, J. W.; Martin, R. L.; Morokuma, K.; Farkas, O.; Foresman, J. B.; and Fox, D. J. *Gaussian 16, Revision A.03*, Gaussian, Inc., Wallingford CT, **2016**.
6. (a) Lee, C.; Yang, W.; Parr, R. G. *Phys. Rev. B.* **1988**, *37*, 785–789; (b) Becke, A. D. *J. Chem. Phys.* **1993**, *98*, 5648–5652; (c) Becke, A. D. *J. Chem. Phys.* **1993**, *98*, 1372–1377; (d) Grimme, S.; Antony, J.; Ehrlich, S.; Krieg, H. *J. Chem. Phys.* **2010**, *132*, 154104; (e) Grimme, S.; Ehrlich S.; Goerigk, L. *J. Comput. Chem.* **2011**, *32*, 1456.
7. Hay, P. J.; Wadt, W. R. *J. Chem. Phys.* **1985**, *82*, 299.
8. Chai, J.-D.; Head-Gordon, M. *Phys. Chem. Chem. Phys.* **2008**, *10*, 6615–6620.
9. Andrae, D.; Häuß ermann, U.; Dolg, M.; Stoll, H.; Preuß, H. *Theoretica chimica acta.* **1990**, *77*, 123.
10. Marenich, A. V.; Cramer, C. J.; Truhlar, D. G. *J. Phys. Chem. B.* **2009**, *113*, 6378.

**$^1\text{H}$  NMR spectrum (400 MHz,  $\text{CDCl}_3$ ) of  $[(\text{TMEDA})\text{Pd}(4\text{-CF}_3\text{Ph})(\text{I})]$  1a**

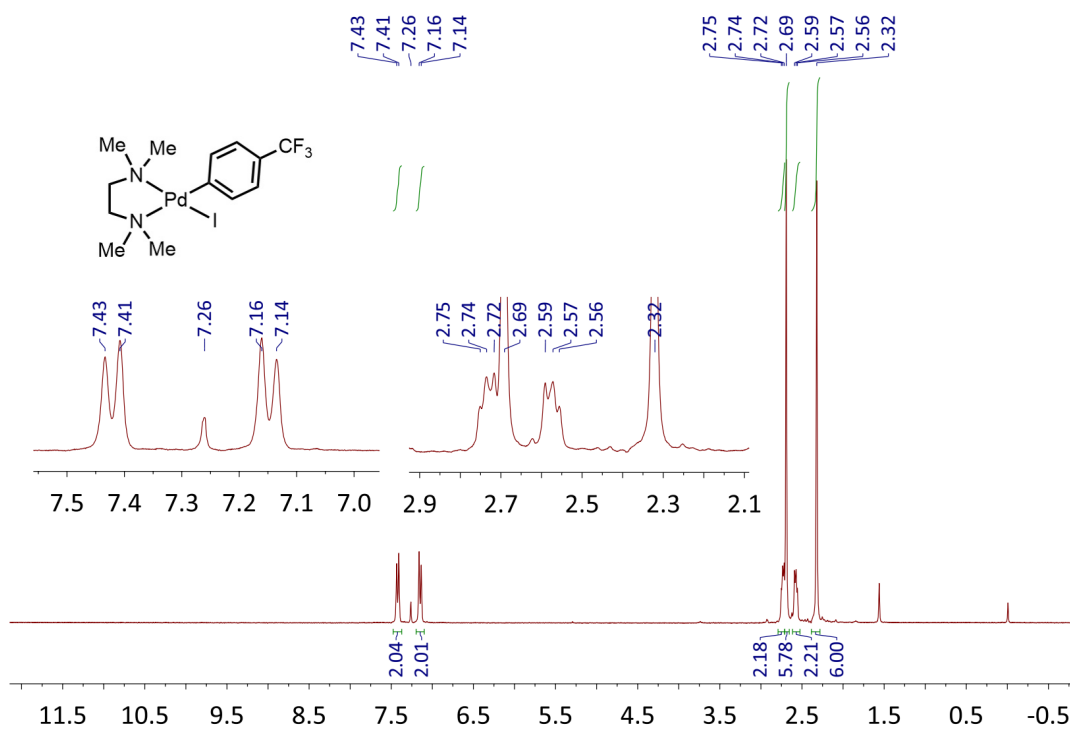

**$^{19}\text{F}$  NMR spectrum (376 MHz,  $\text{CDCl}_3$ ) of  $[(\text{TMEDA})\text{Pd}(4\text{-CF}_3\text{Ph})(\text{I})]$  1a**

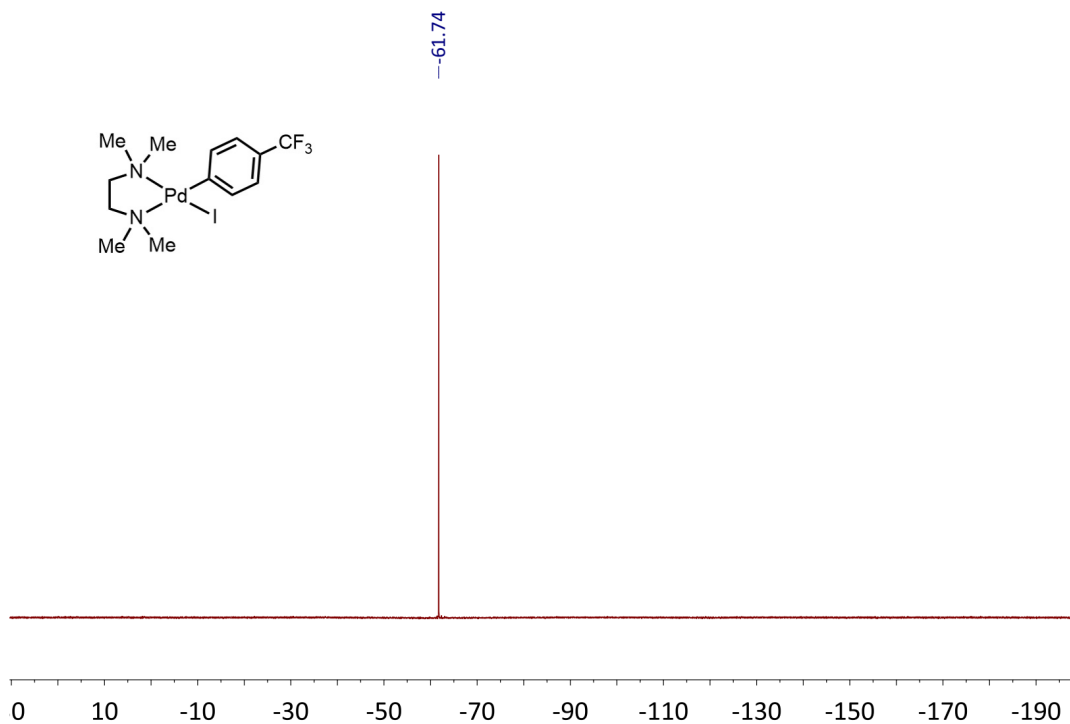

**$^1\text{H}$  NMR spectrum (400 MHz,  $\text{CDCl}_3$ ) of  $[\text{cis}-(4\text{-MePy})_2\text{Pd}(4\text{-CF}_3\text{Ph})(\text{I})]$  1b**

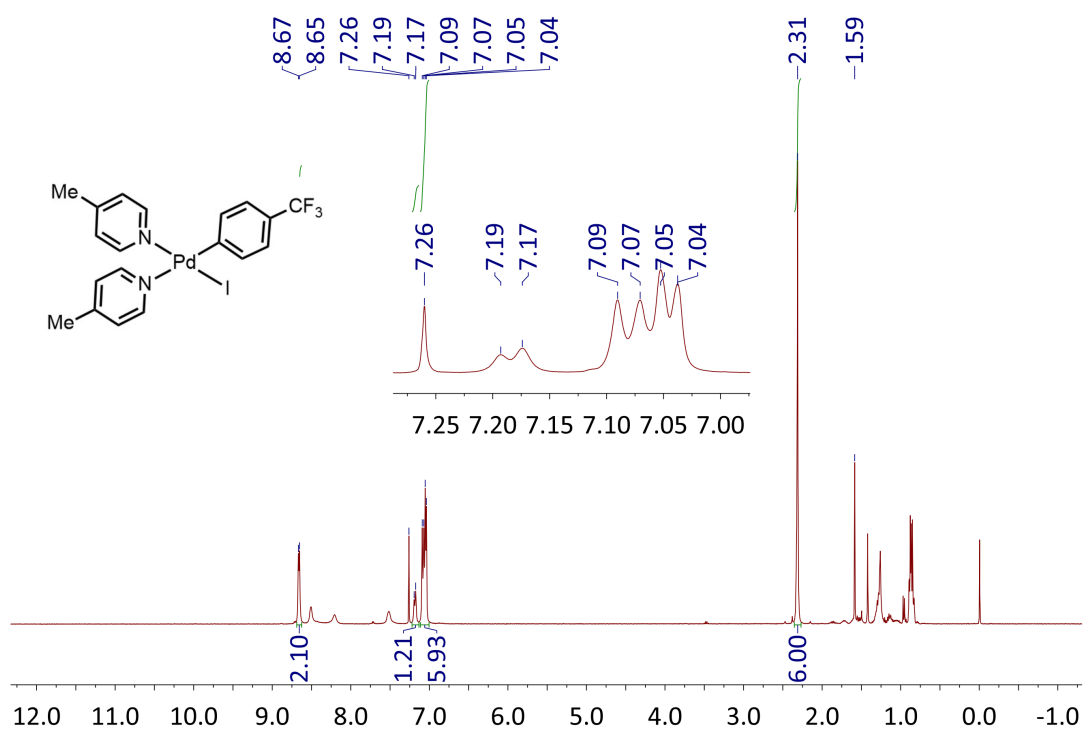

**$^{19}\text{F}$  NMR spectrum (376 MHz,  $\text{CDCl}_3$ ) of  $[\text{cis}-(4\text{-MePy})_2\text{Pd}(4\text{-CF}_3\text{Ph})(\text{I})]$  1b**

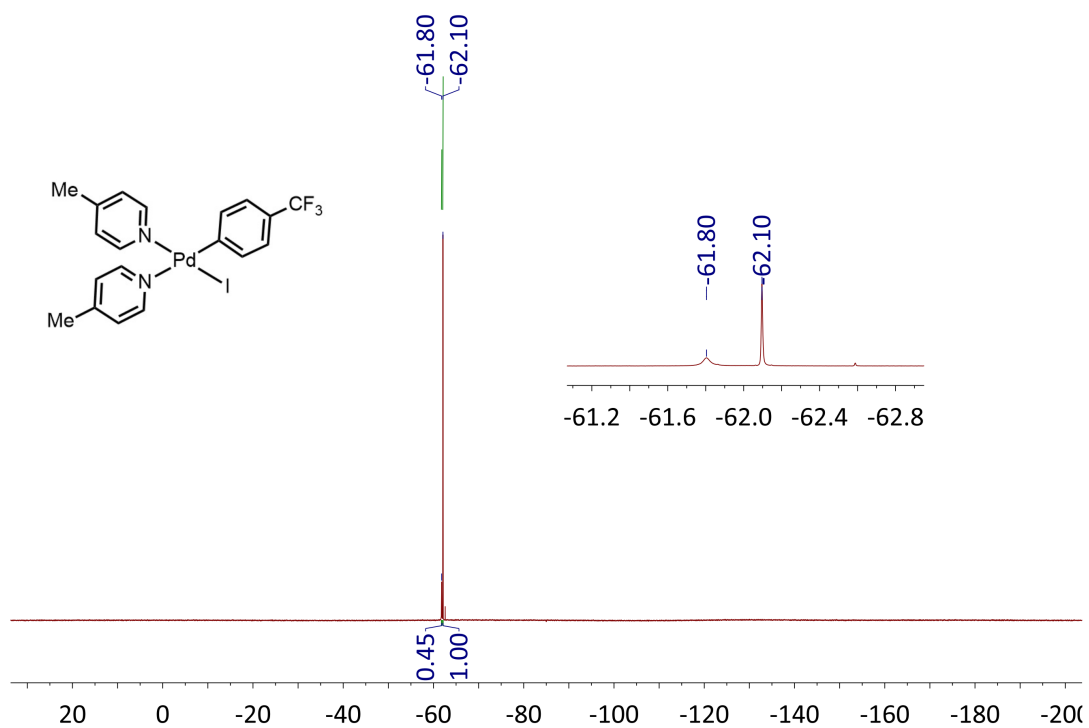

**<sup>1</sup>H NMR spectrum (400 MHz, THF-*d*<sub>8</sub>) of [(TMEDA)Pd(4-CF<sub>3</sub>Ph)(OCF<sub>3</sub>)] 2a**

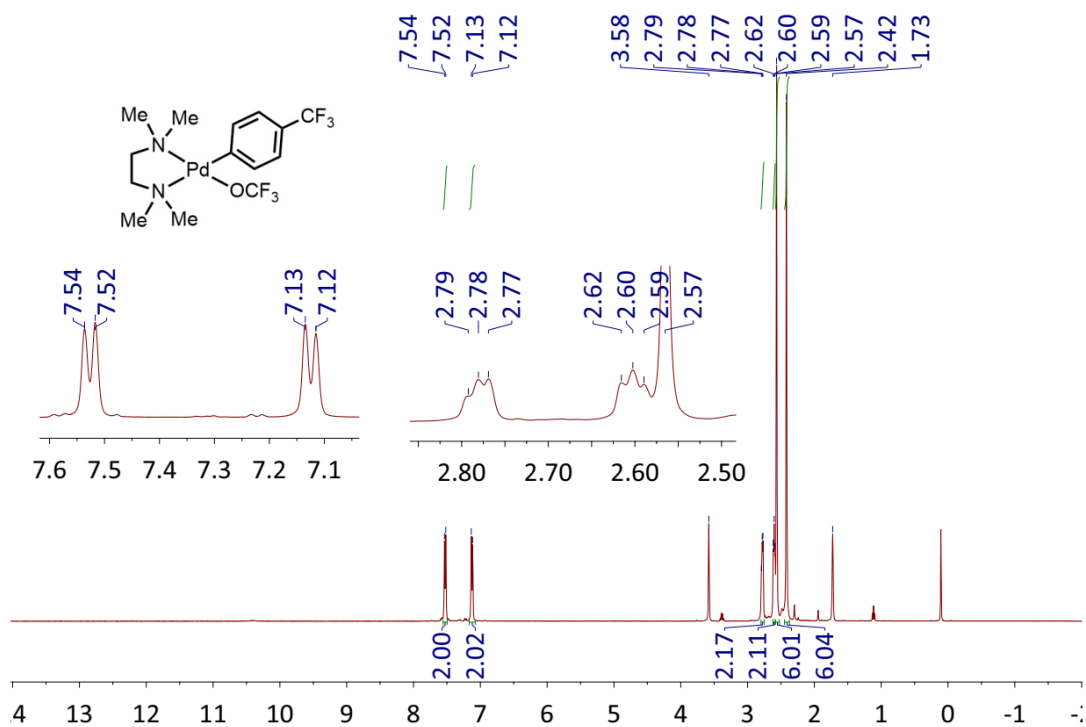

**<sup>19</sup>F NMR spectrum (376 MHz, THF-*d*<sub>8</sub>) of [(TMEDA)Pd(4-CF<sub>3</sub>Ph)(OCF<sub>3</sub>)] 2a**

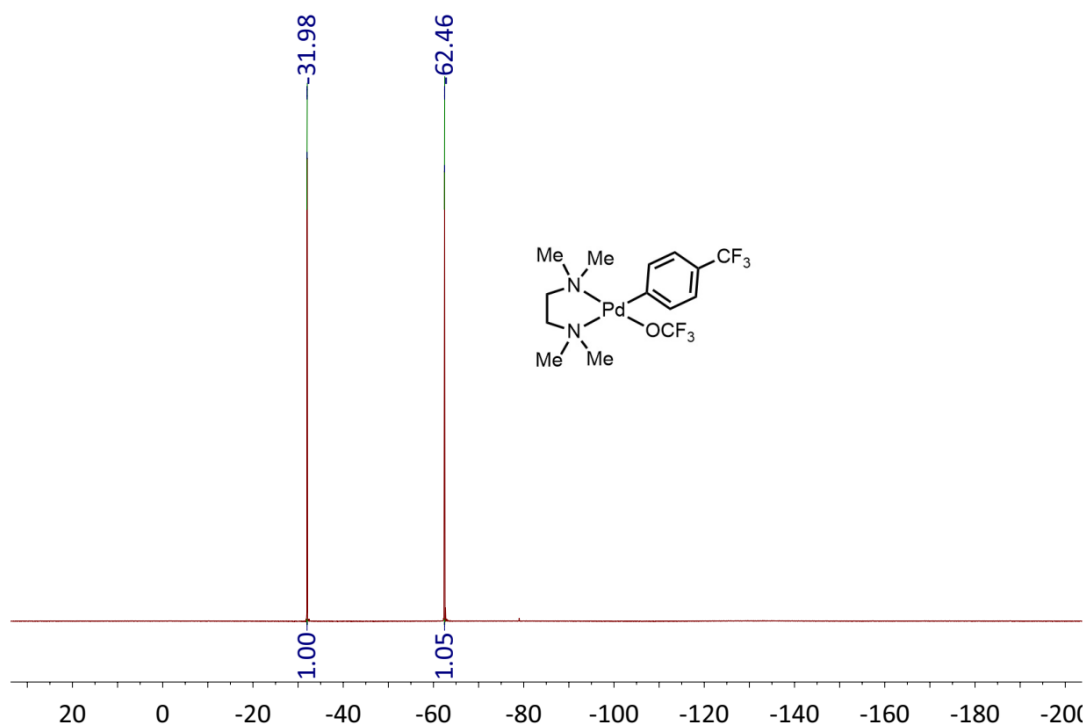



**<sup>1</sup>H NMR spectrum (400 MHz, THF-*d*<sub>8</sub>) of [trans-(4-MePy)<sub>2</sub>Pd(4-CF<sub>3</sub>Ph)(OCF<sub>3</sub>)] 2b**

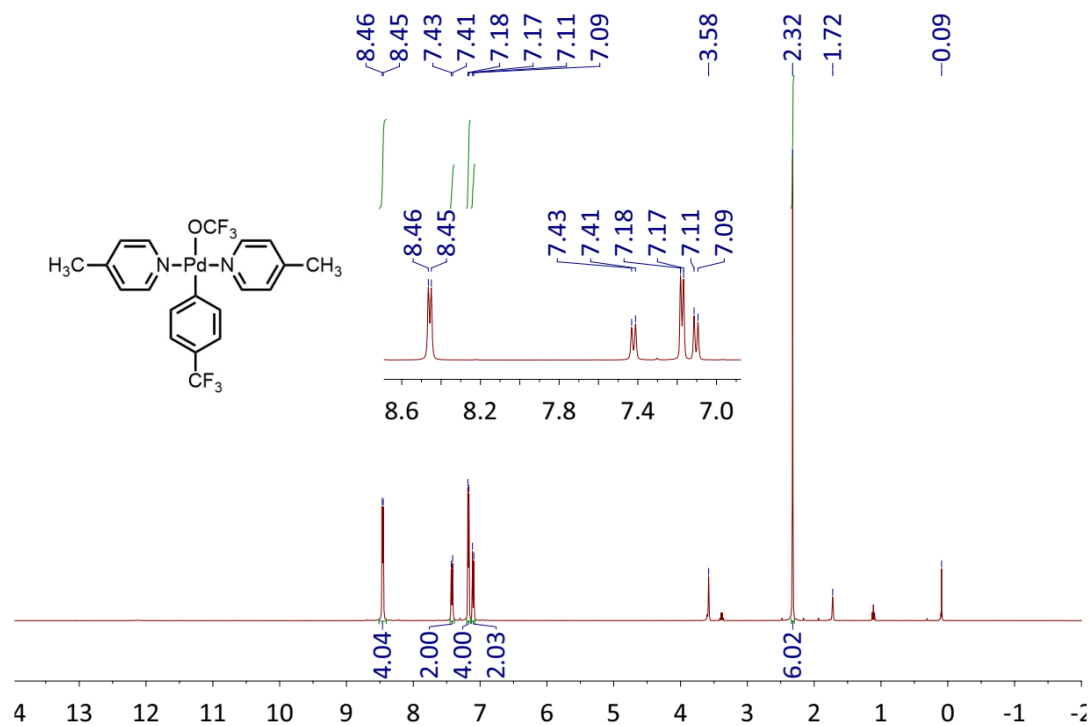

**<sup>19</sup>F NMR spectrum (400 MHz, THF-*d*<sub>8</sub>) of [trans-(4-MePy)<sub>2</sub>Pd(4-CF<sub>3</sub>Ph)(OCF<sub>3</sub>)] 2b**

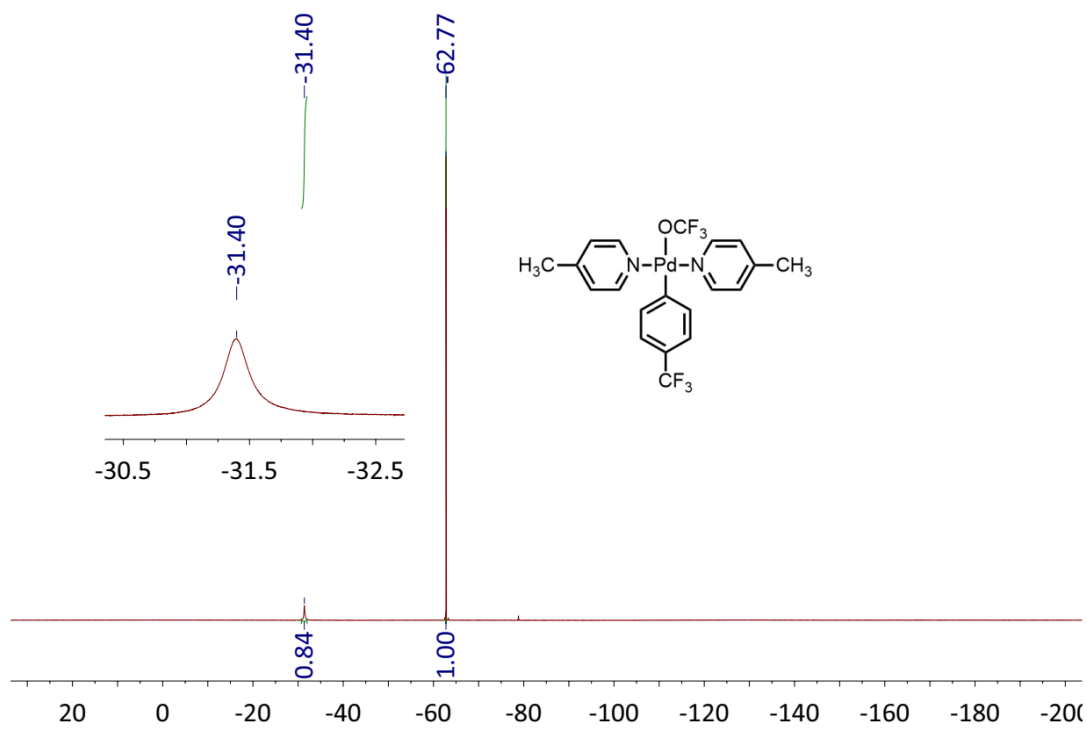

**$^{19}\text{F}$  NMR spectrum (565 MHz,  $\text{THF-}d_8$ , 253 K) of  
[*trans*-(4-MePy) $_2$ Pd(4-CF $_3$ Ph)(OCF $_3$ )] 2b**

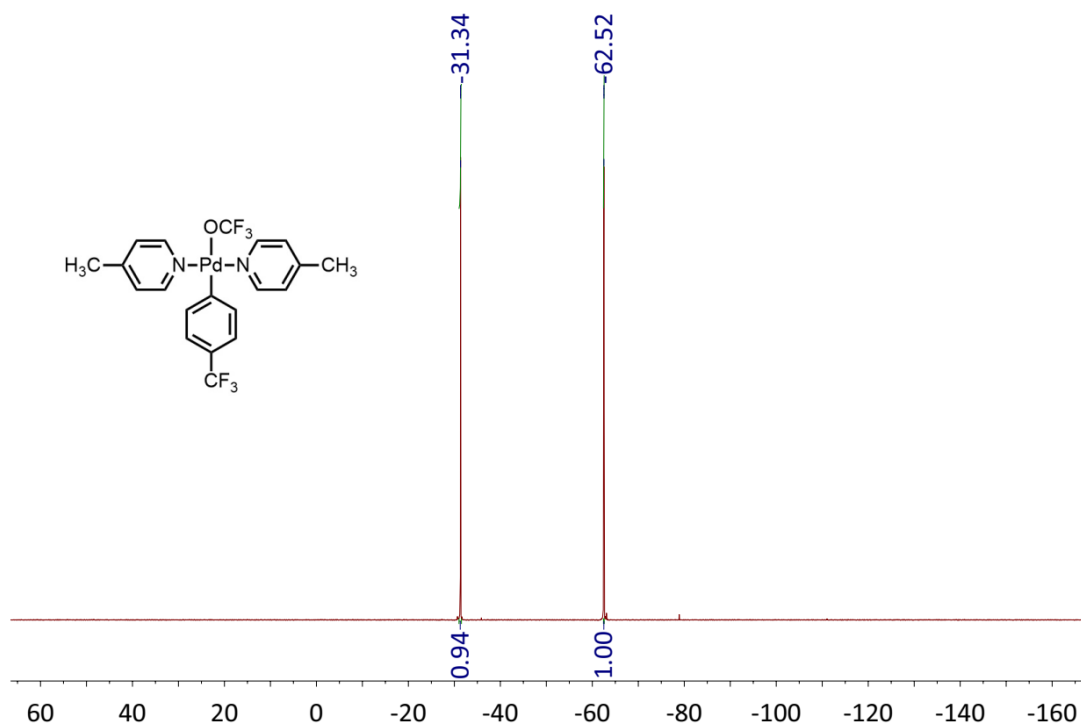

**$^{19}\text{F}$  NMR spectrum (376 MHz, unlocked) of  
4-(trifluoromethyl)benzoyl fluoride 2c in solution.**

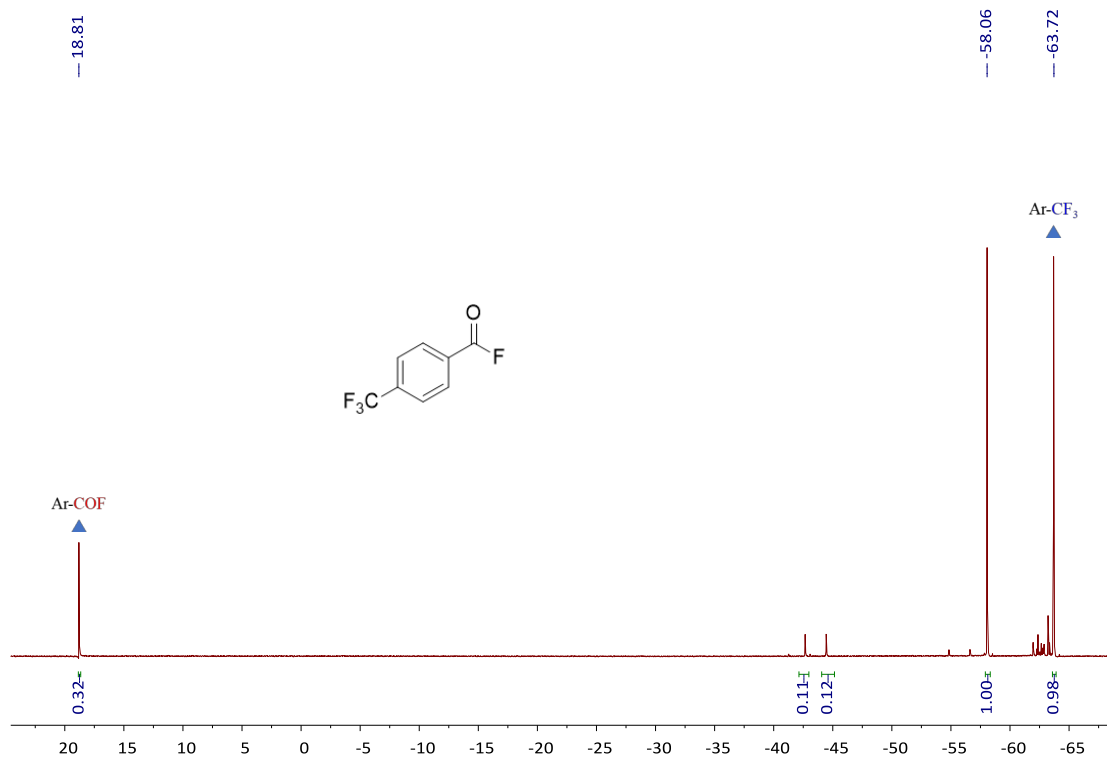

# GC-MS of 4-(trifluoromethyl)benzoyl fluoride 2c.

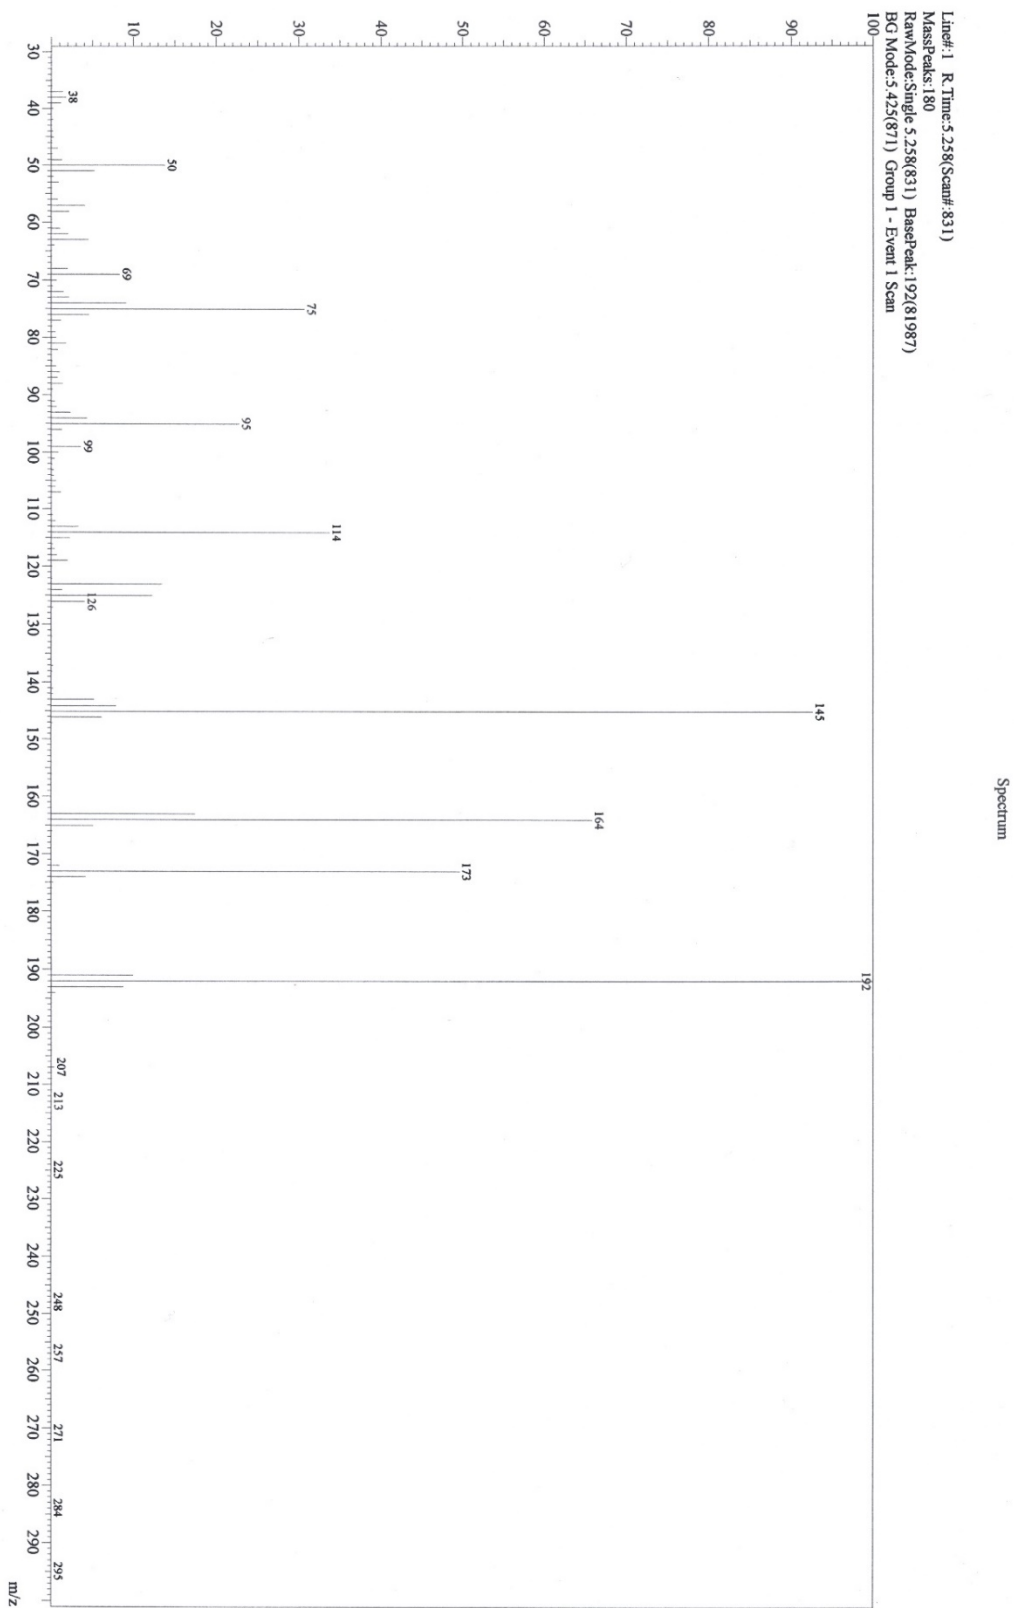

**<sup>1</sup>H NMR spectrum (400 MHz, CD<sub>2</sub>Cl<sub>2</sub>) of [(DPPF)Pd(4-CH<sub>3</sub>-Py)(4-CF<sub>3</sub>-Ph)][OTf] 3c**

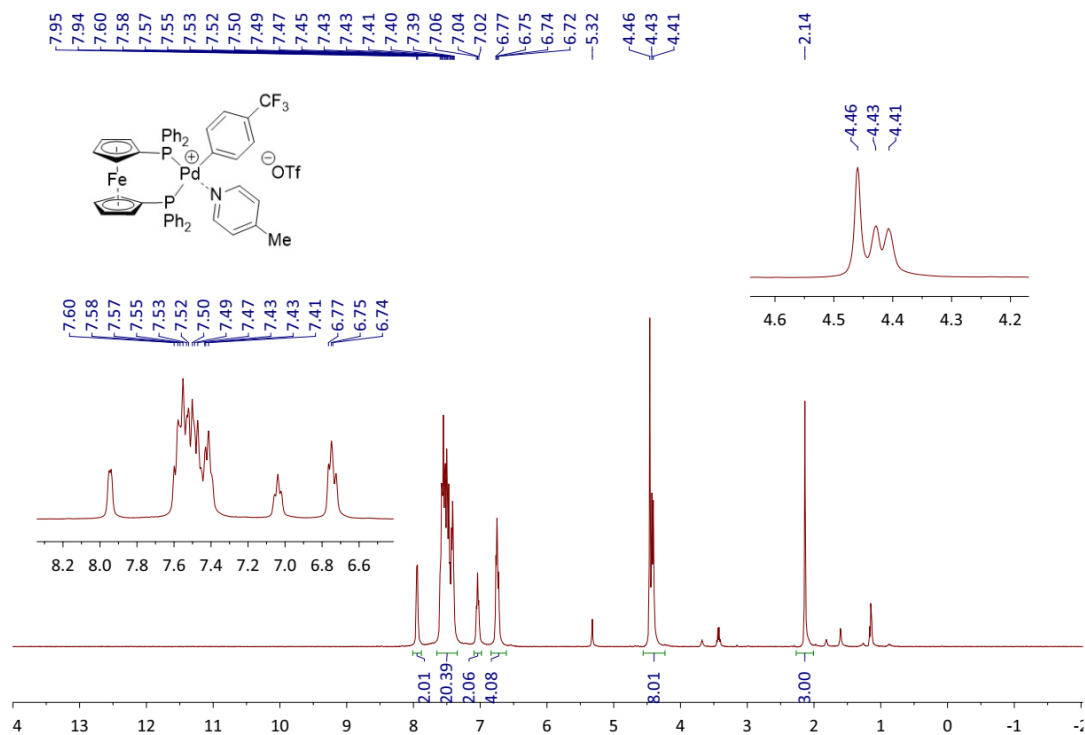

**<sup>19</sup>F NMR spectrum (400 MHz, CD<sub>2</sub>Cl<sub>2</sub>) of [(DPPF)Pd(4-CH<sub>3</sub>-Py)(4-CF<sub>3</sub>-Ph)][OTf] 3c**

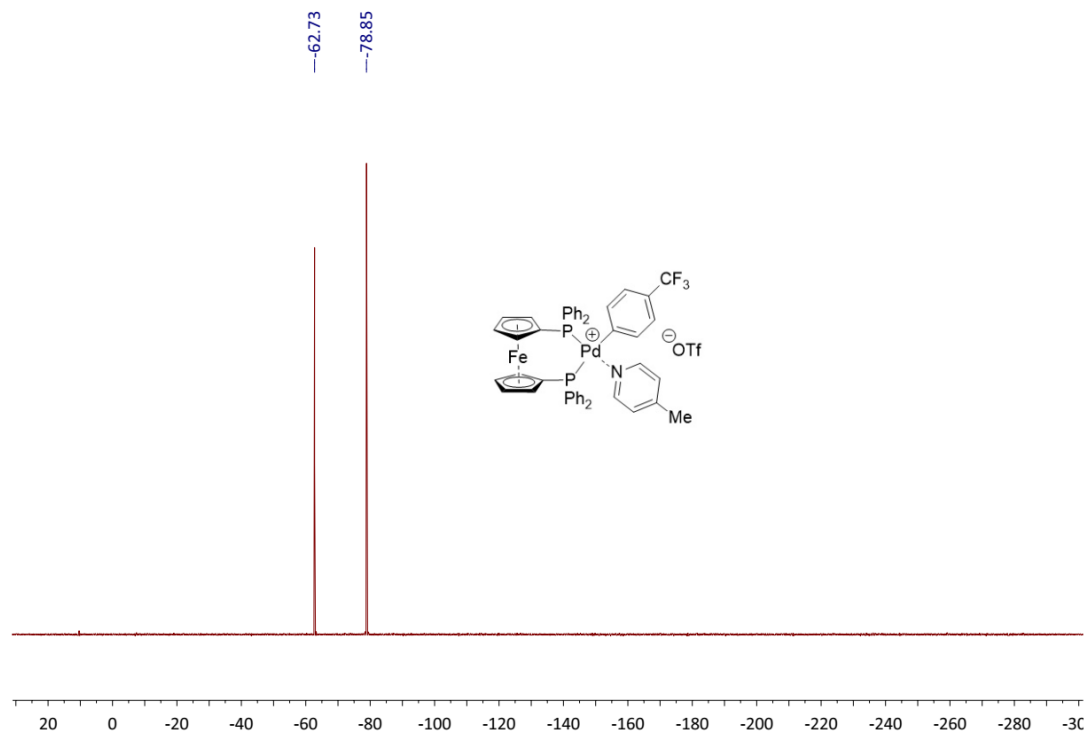

**$^{31}\text{P}$  NMR spectrum (400 MHz,  $\text{CD}_2\text{Cl}_2$ ) of  
 [(DPPF)Pd(4- $\text{CH}_3$ -Py)(4- $\text{CF}_3$ -Ph)][OTf] 3c**

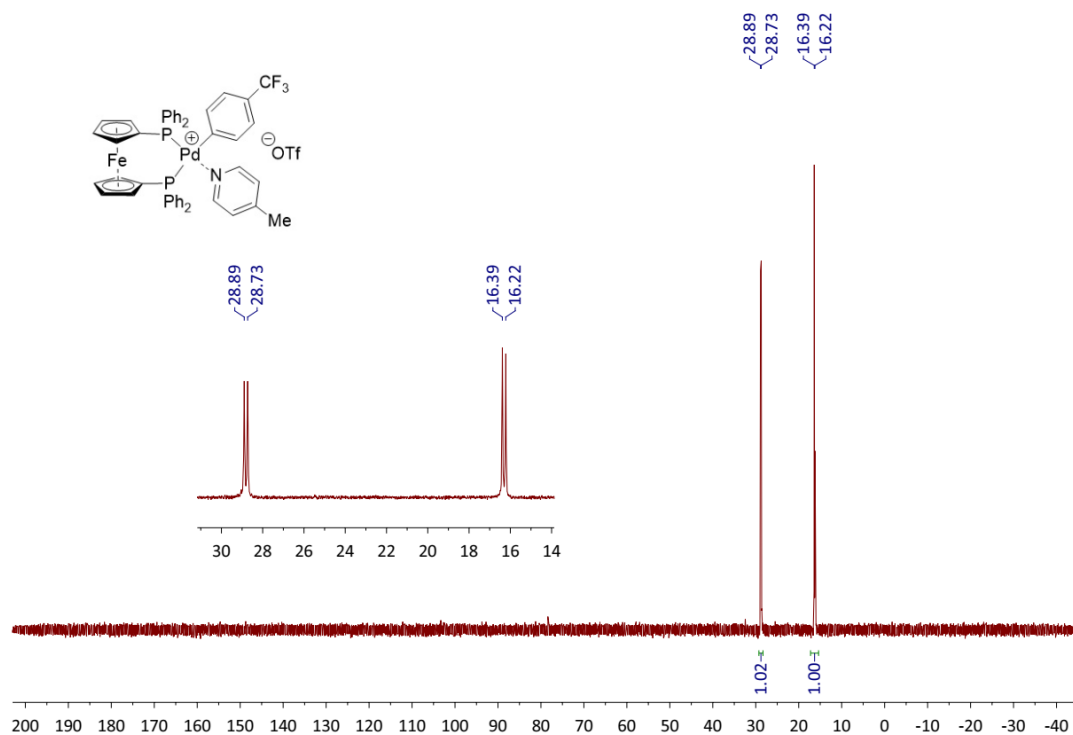

**$^1\text{H}$  NMR spectrum (400 MHz,  $\text{CD}_2\text{Cl}_2$ ) of [( $t$ -Bu-BrettPhos)Pd(4- $\text{CF}_3$ Ph)(I)] 4a**

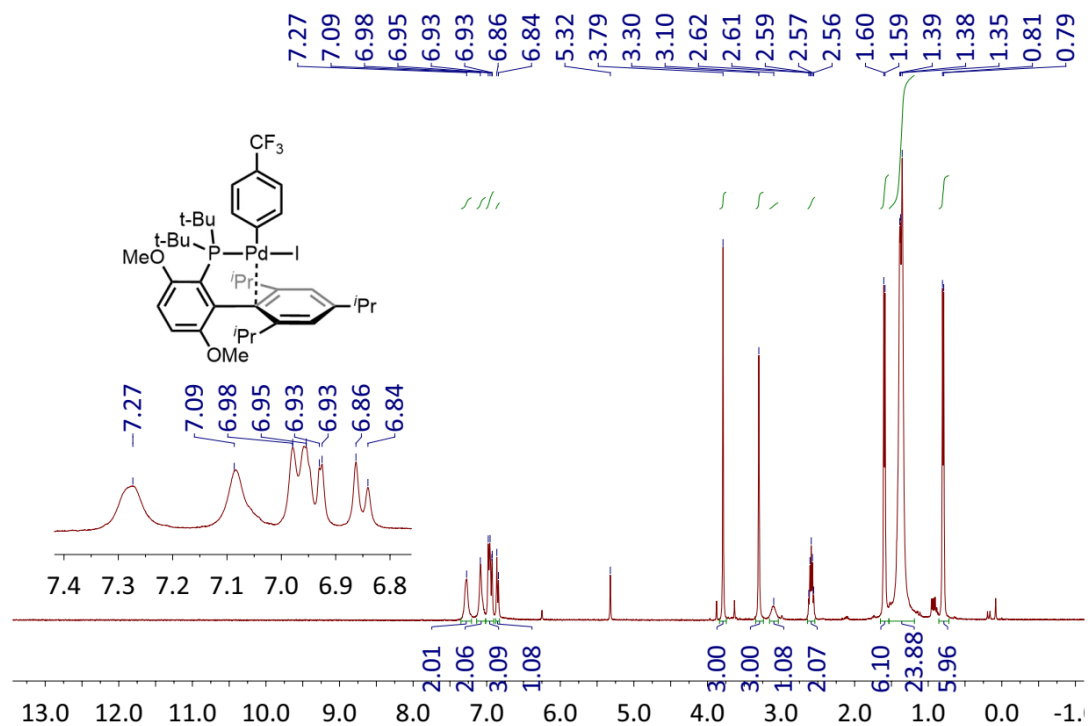

**$^{19}\text{F}$  NMR spectrum (376 MHz,  $\text{CD}_2\text{Cl}_2$ ) of [(*t*-Bu-BrettPhos)Pd(4- $\text{CF}_3\text{Ph}$ )(I)] 4a**

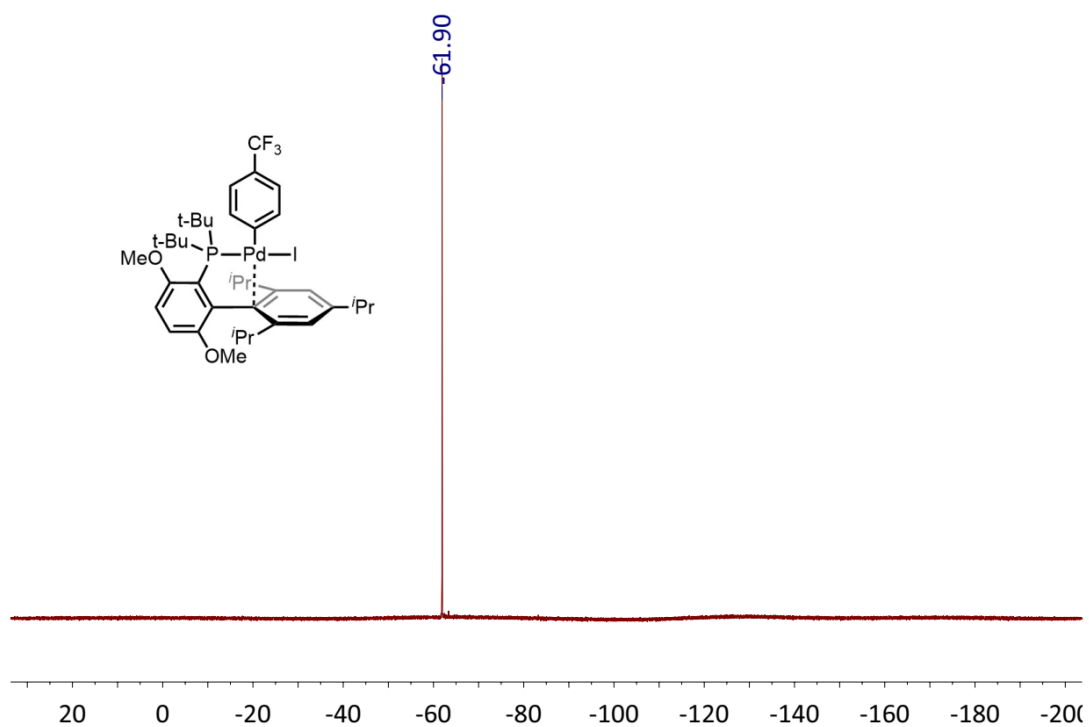

**$^{31}\text{P}$  NMR spectrum (162 MHz,  $\text{CD}_2\text{Cl}_2$ ) of [(*t*-Bu-BrettPhos)Pd(4- $\text{CF}_3\text{Ph}$ )(I)] 4a**

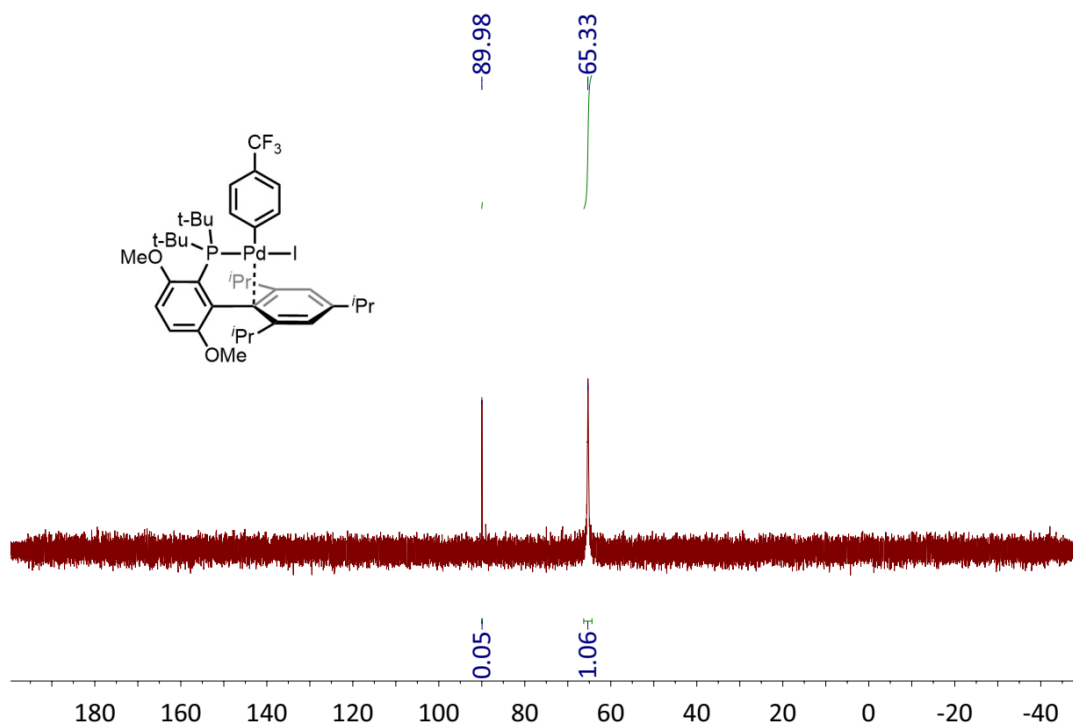

**$^1\text{H}$  NMR spectrum (400 MHz,  $\text{CD}_2\text{Cl}_2$ ) of [(BrettPhos)Pd(4- $\text{CF}_3\text{Ph}$ )(I)] 4b**

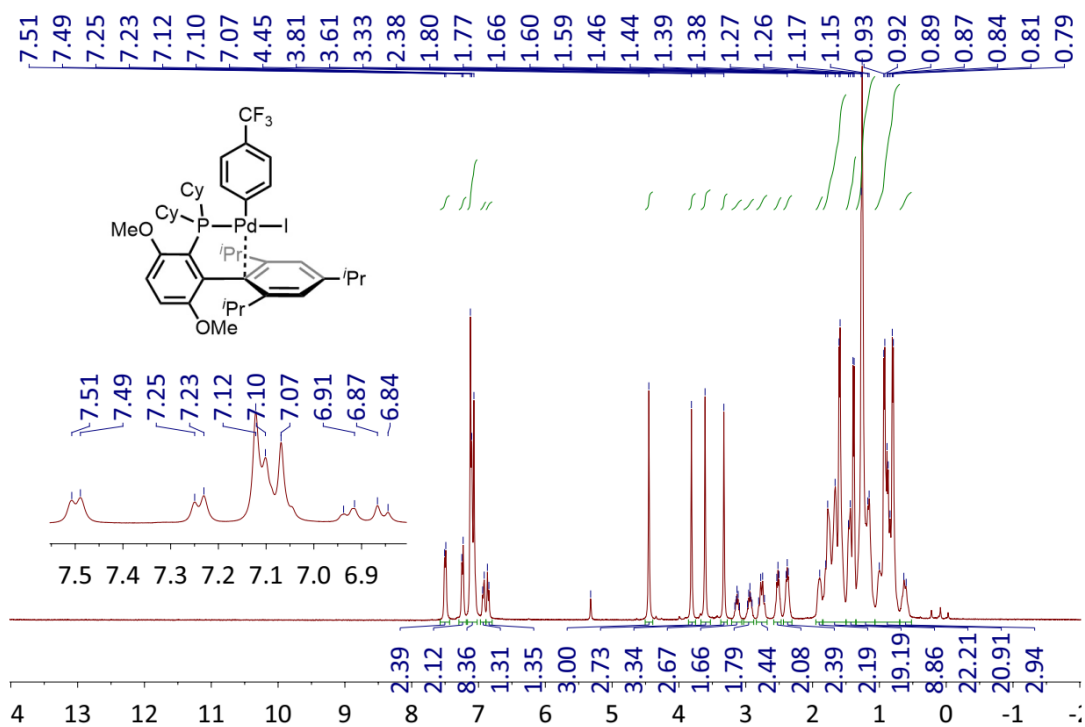

**$^{19}\text{F}$  NMR spectrum (376 MHz,  $\text{CD}_2\text{Cl}_2$ ) of [(BrettPhos)Pd(4- $\text{CF}_3\text{Ph}$ )(I)] 4b**

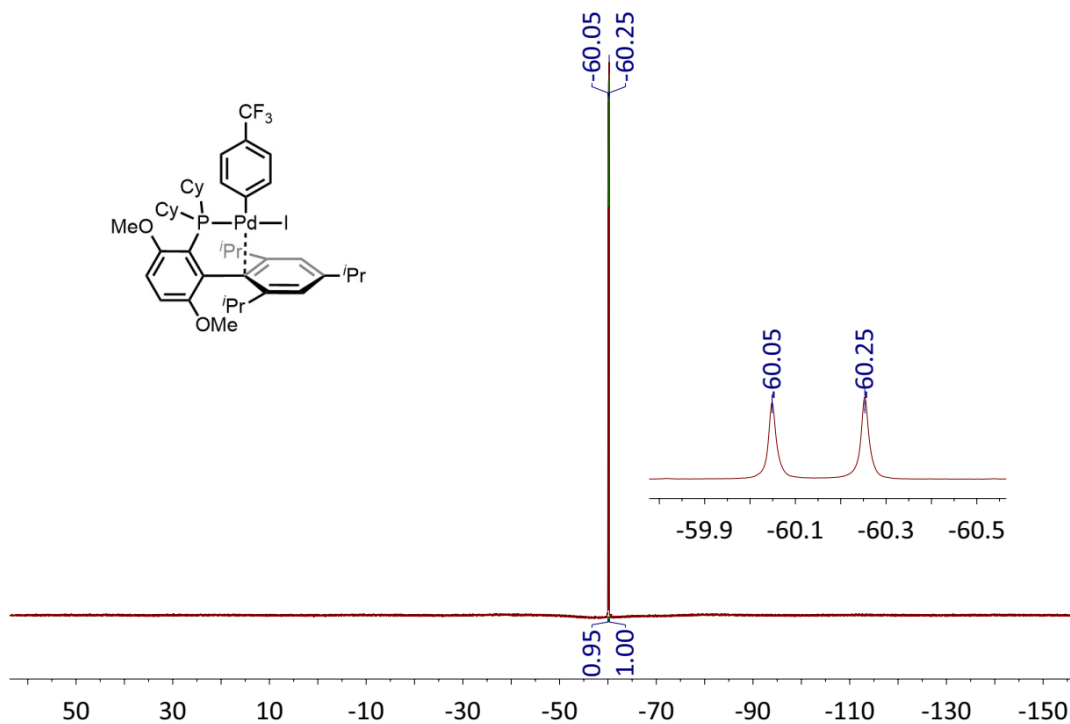

**$^{31}\text{P}$  NMR spectrum (162 MHz,  $\text{CD}_2\text{Cl}_2$ ) of [(BrettPhos)Pd(4- $\text{CF}_3\text{Ph}$ )(I)] 4b**

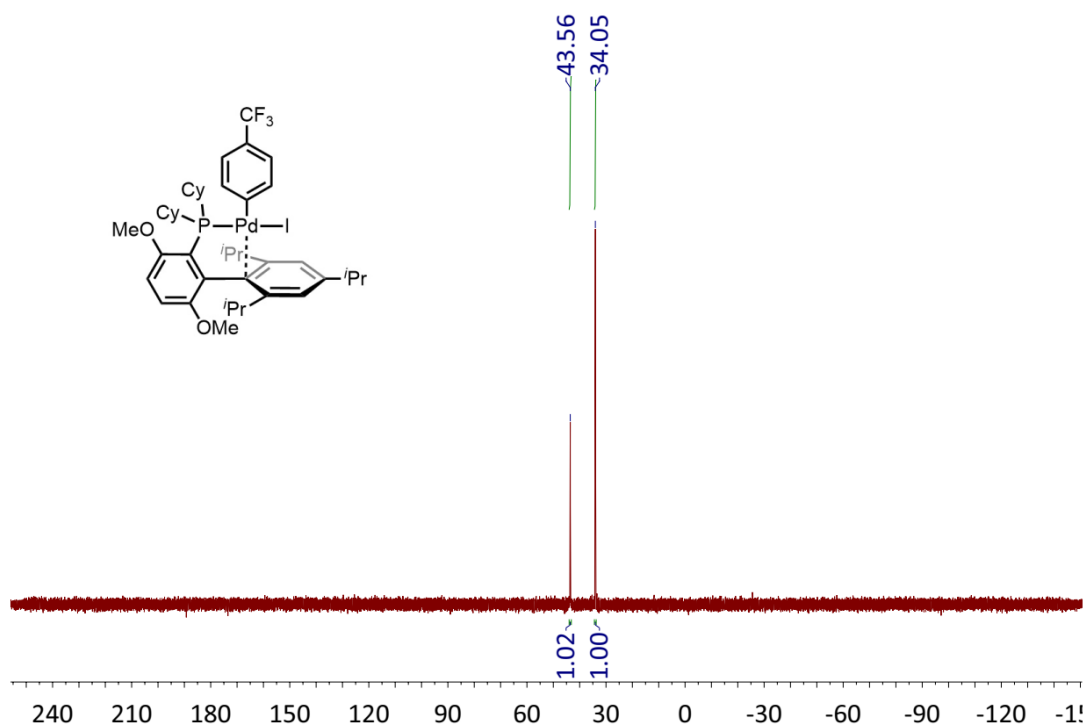

**$^1\text{H}$  NMR spectrum (500 MHz,  $\text{CD}_2\text{Cl}_2$ ) of [(RuPhos)Pd(4- $\text{CF}_3\text{Ph}$ )(I)] 4c**

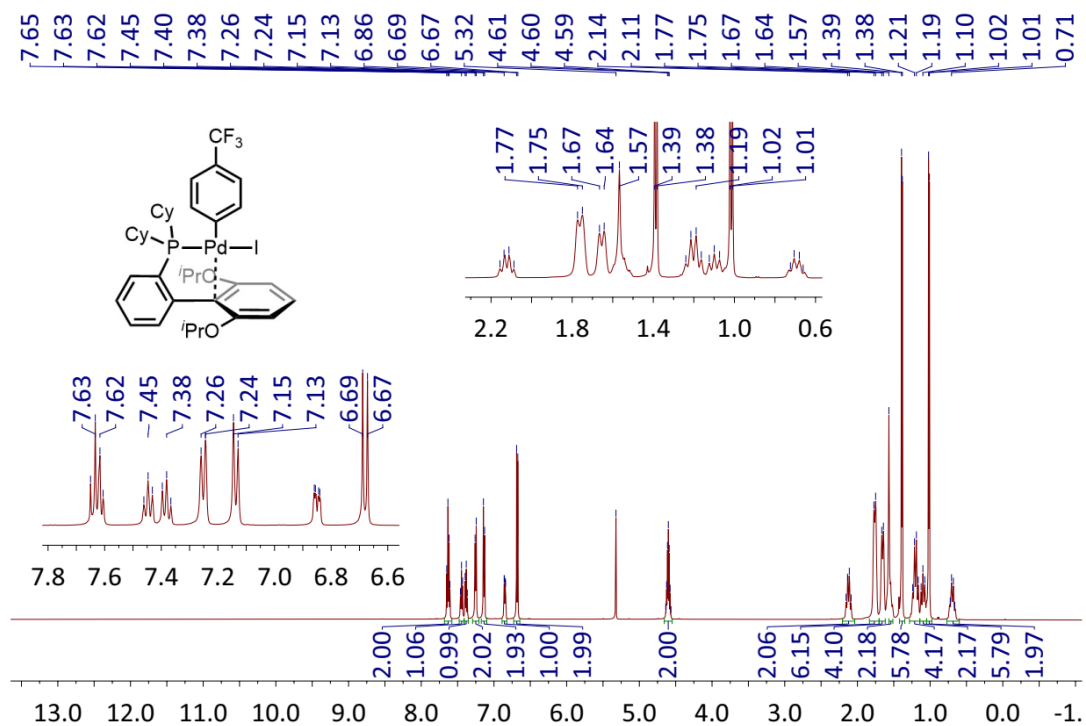



**$^{19}\text{F}$  NMR spectrum (471 MHz,  $\text{CD}_2\text{Cl}_2$ ) of  $[(\text{RuPhos})\text{Pd}(4\text{-CF}_3\text{Ph})(\text{I})]$  4c**

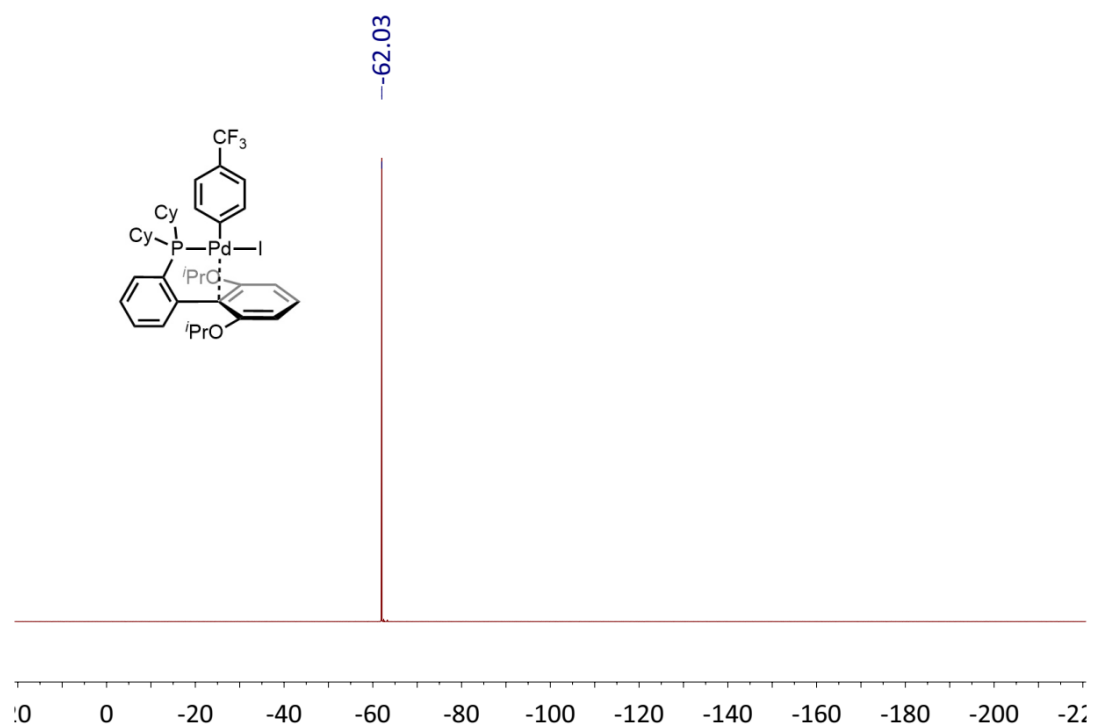

**$^{31}\text{P}$  NMR spectrum (202 MHz,  $\text{CD}_2\text{Cl}_2$ ) of  $[(\text{RuPhos})\text{Pd}(4\text{-CF}_3\text{Ph})(\text{I})]$  4c**

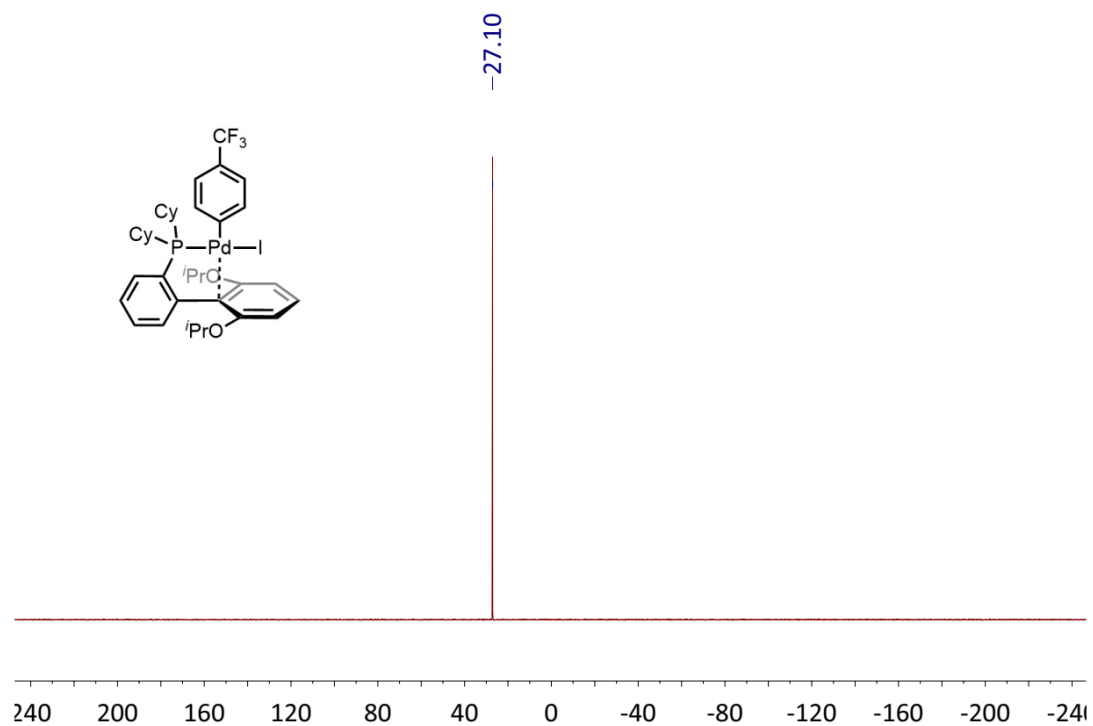

**<sup>1</sup>H NMR spectrum (400 MHz, CDCl<sub>3</sub>) of [(CPhos)Pd(4-CF<sub>3</sub>Ph)(I)] 4d**

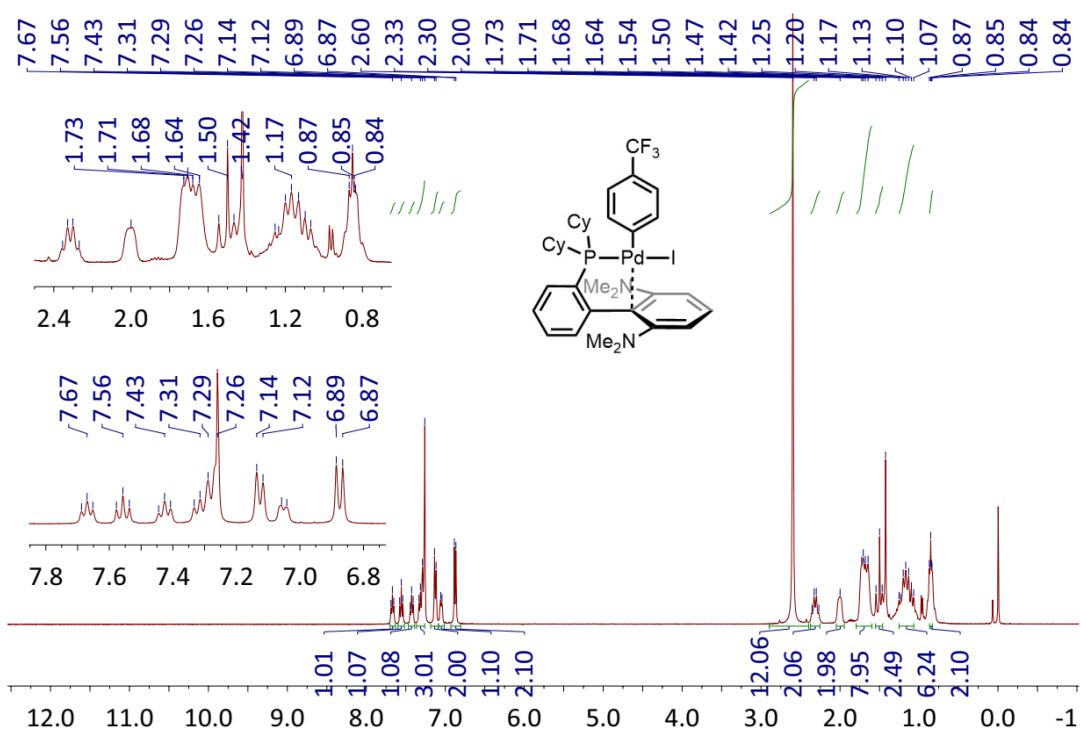

**<sup>19</sup>F NMR spectrum (376 MHz, CDCl<sub>3</sub>) of [(CPhos)Pd(4-CF<sub>3</sub>Ph)(I)] 4d**

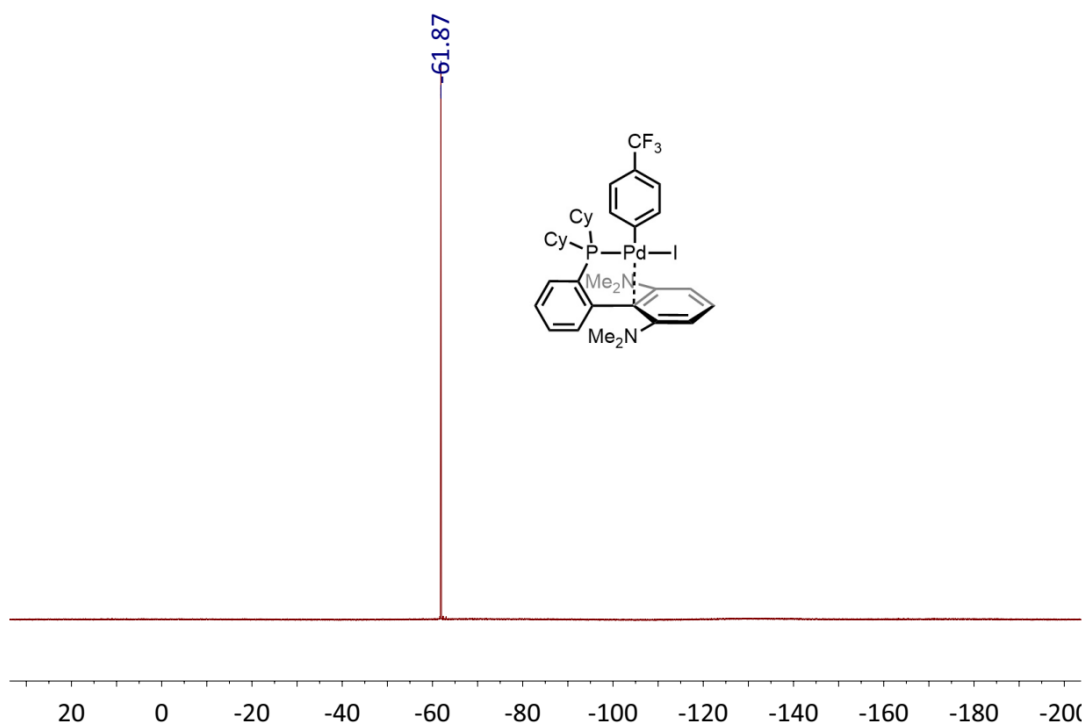

**<sup>31</sup>P NMR spectrum (162 MHz, CDCl<sub>3</sub>) of [(CPhos)Pd(4-CF<sub>3</sub>Ph)(I)] 4d**

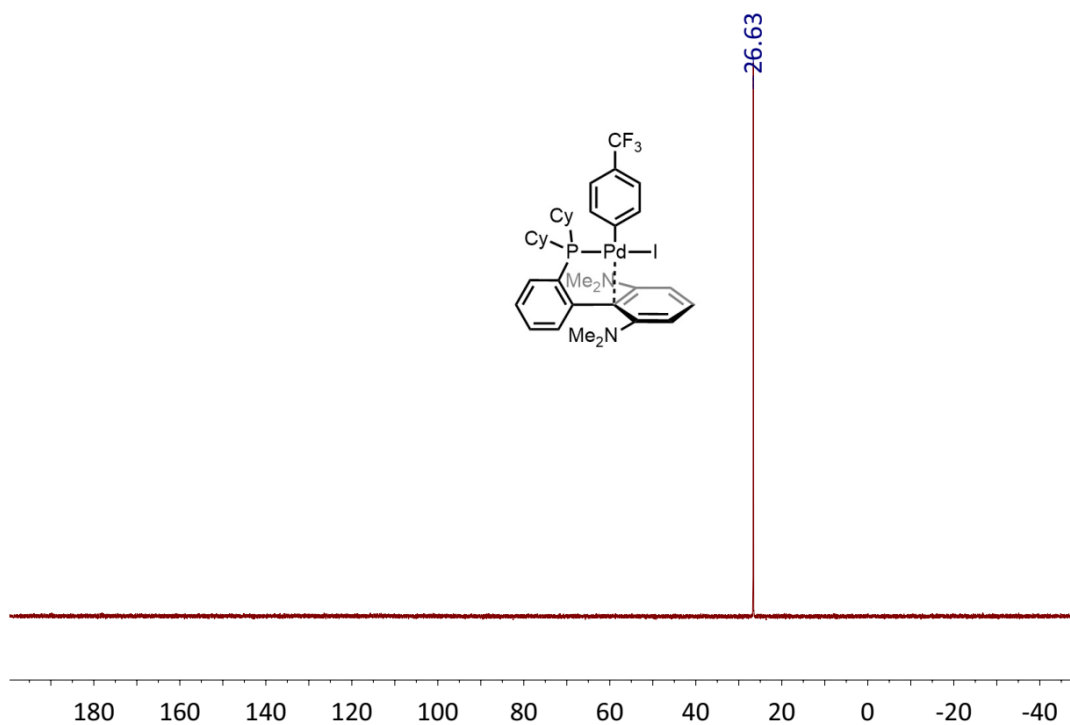

**<sup>1</sup>H NMR spectrum (600 MHz, C<sub>6</sub>D<sub>6</sub>) of [(<sup>t</sup>Bu-BrettPhos)Pd(4-CF<sub>3</sub>Ph)(OCF<sub>3</sub>)] 5a**

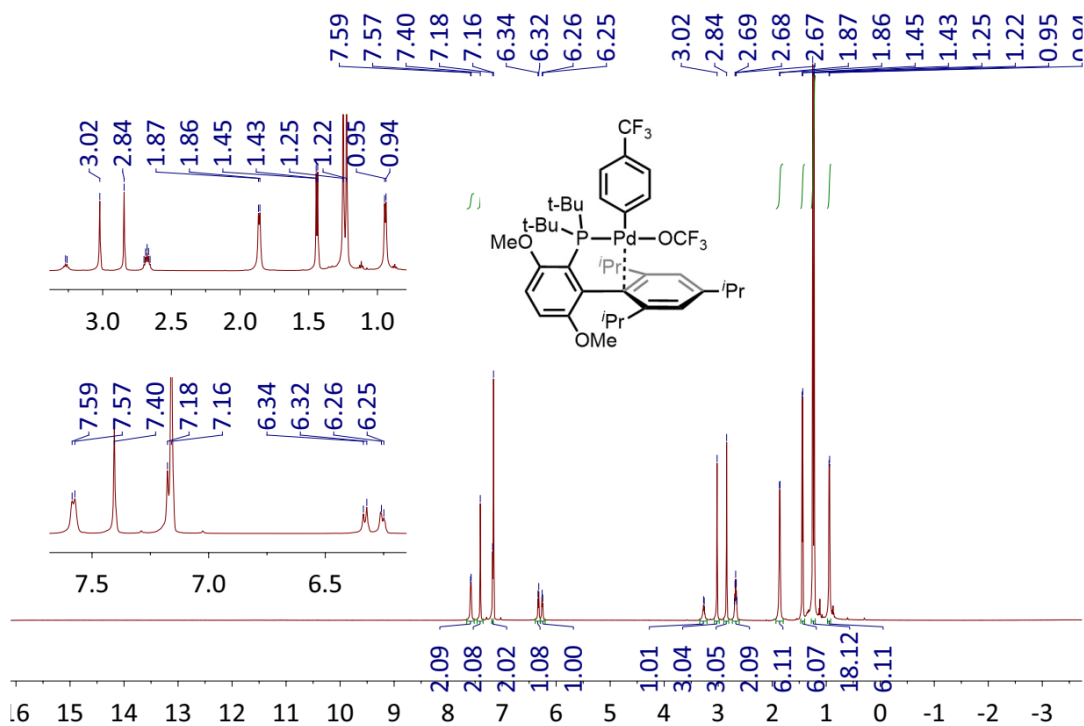

**$^{19}\text{F}$  NMR spectrum (565 MHz,  $\text{C}_6\text{D}_6$ ) of (*t*-Bu-BrettPhos)Pd(4- $\text{CF}_3\text{Ph}$ )( $\text{OCF}_3$ ) 5a**

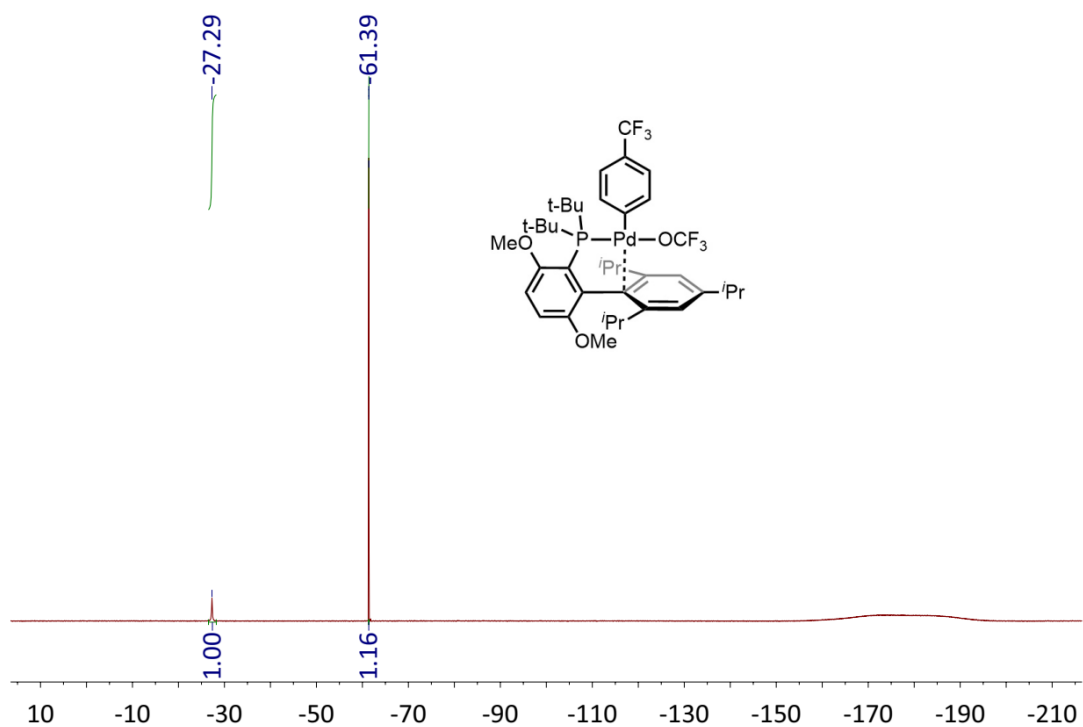

**$^{19}\text{F}$  NMR spectrum (600 MHz,  $\text{C}_6\text{D}_6$ , 283 K) of [(*t*-Bu-BrettPhos)Pd(4- $\text{CF}_3\text{Ph}$ )( $\text{OCF}_3$ )] 5a**

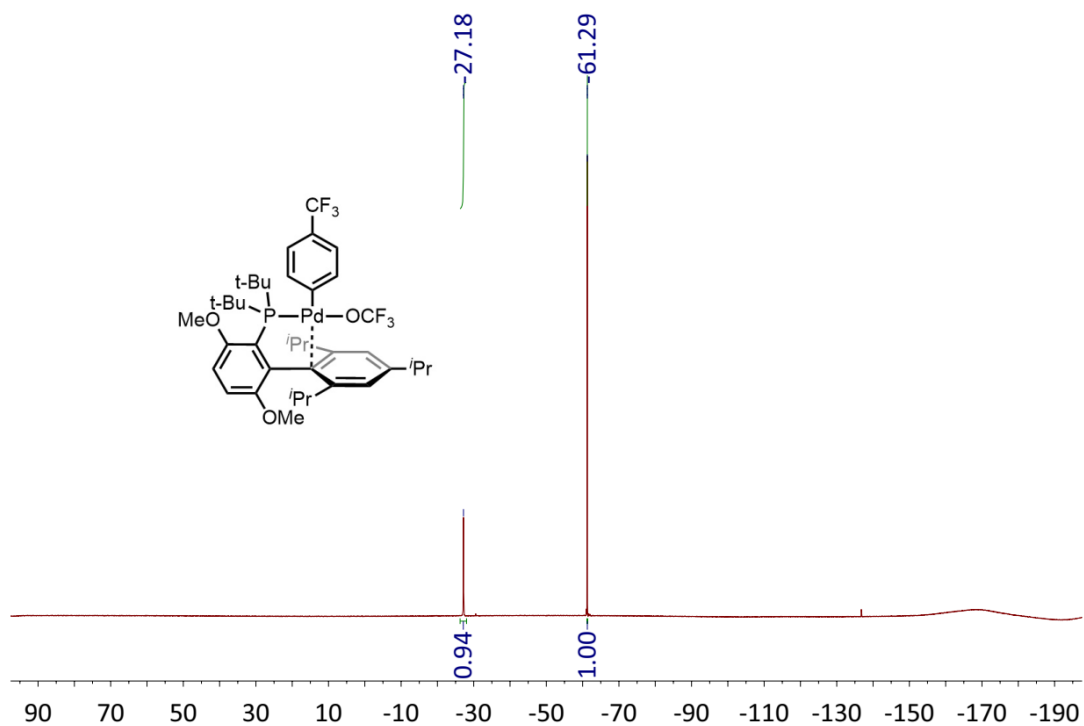

**$^{31}\text{P}$  NMR spectrum (243 MHz,  $\text{C}_6\text{D}_6$ ) of  $[(\text{t-Bu-BrettPhos})\text{Pd}(4\text{-CF}_3\text{Ph})(\text{OCF}_3)]$  5a**

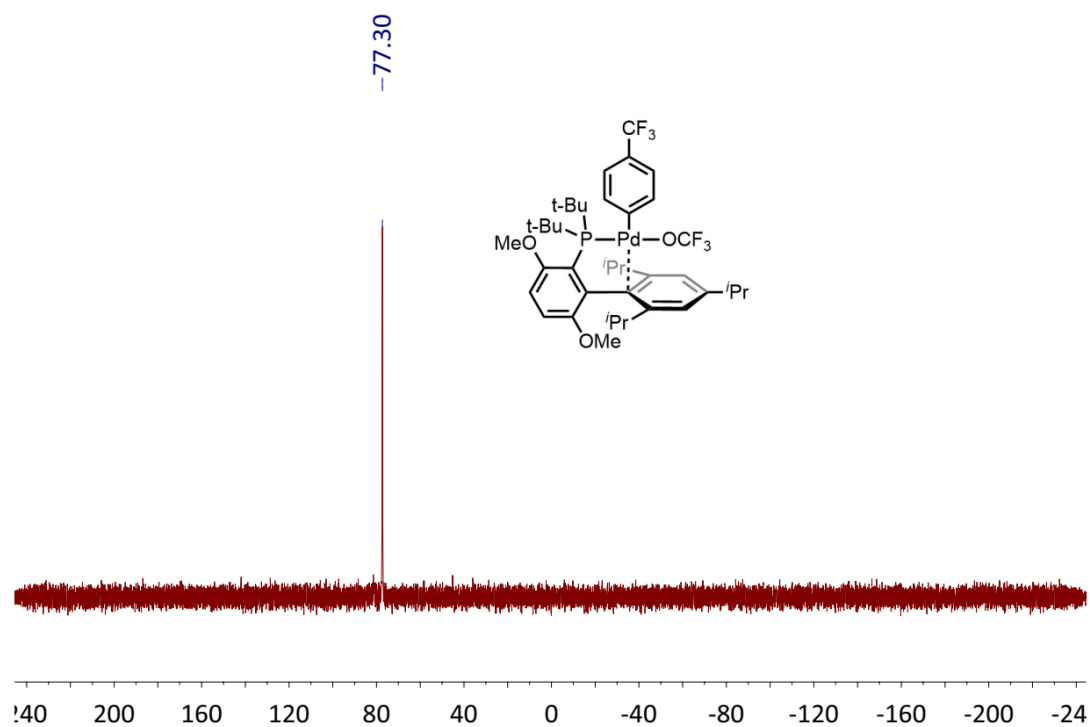

**$^1\text{H}$  NMR spectrum (600 MHz,  $\text{C}_6\text{D}_6$ ) of  $[(\text{BrettPhos})\text{Pd}(4\text{-CF}_3\text{Ph})(\text{OCF}_3)]$  5b**

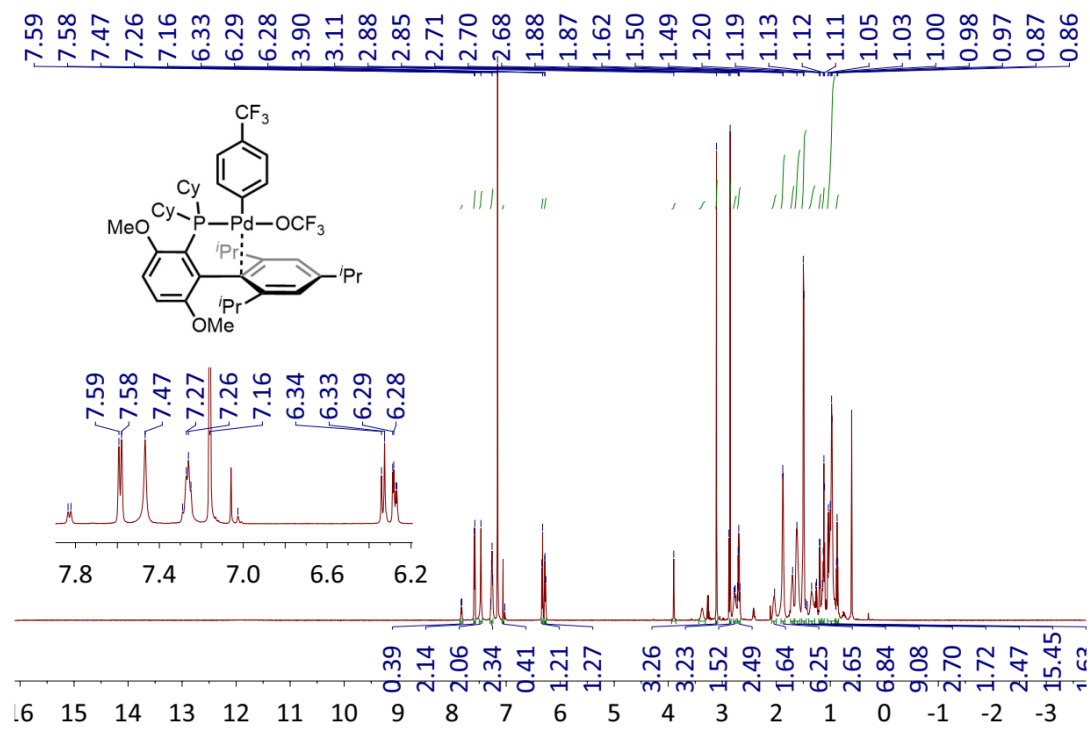

**$^{19}\text{F}$  NMR spectrum (565 MHz,  $\text{C}_6\text{D}_6$ , 298 K) of  
[(BrettPhos)Pd(4- $\text{CF}_3\text{Ph}$ )( $\text{OCF}_3$ )] **5b****

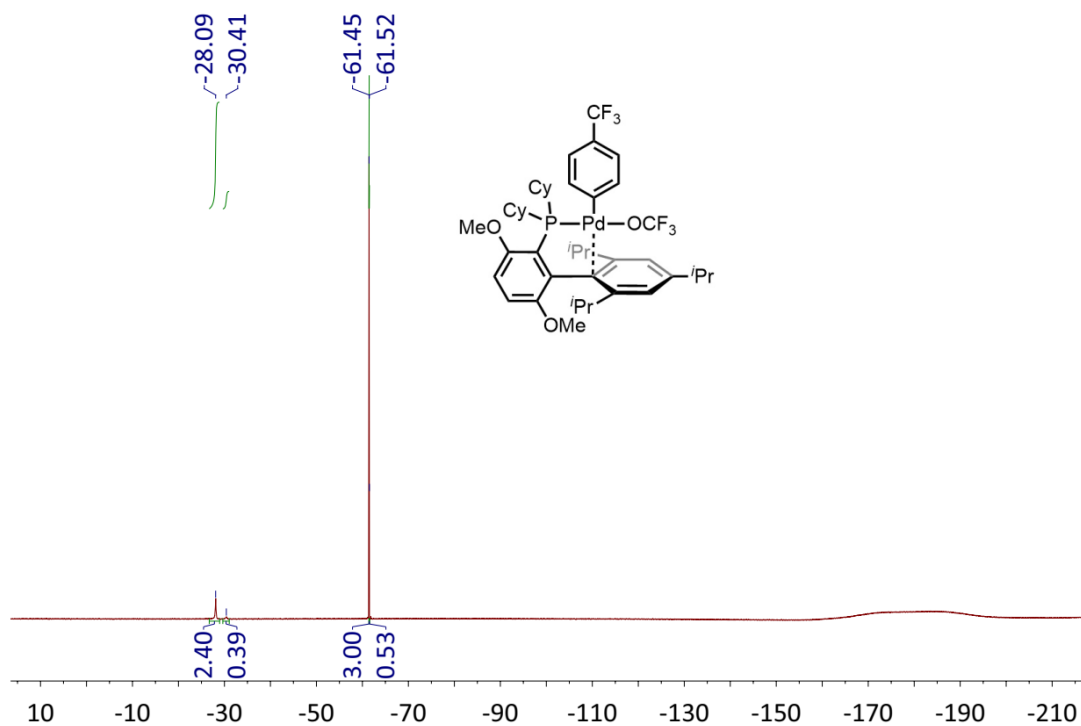

**$^{19}\text{F}$  NMR spectrum (565 MHz,  $\text{C}_6\text{D}_6$ , 283 K) of  
[(BrettPhos)Pd(4- $\text{CF}_3\text{Ph}$ )( $\text{OCF}_3$ )] **5b****

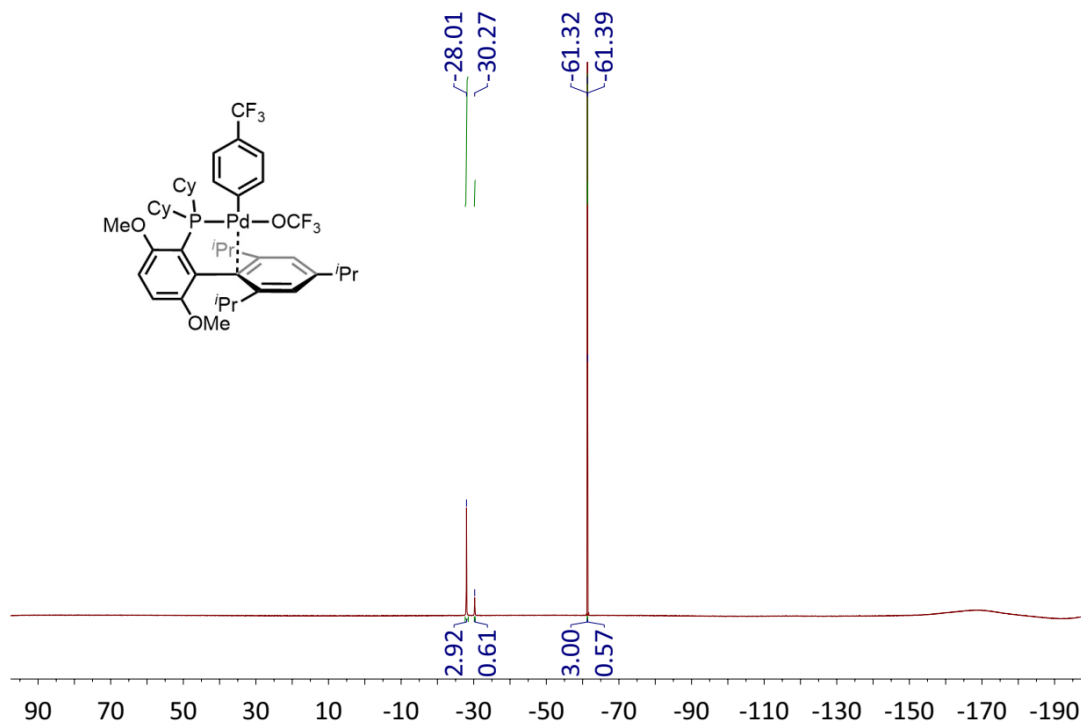

**$^{31}\text{P}$  NMR spectrum (243 MHz,  $\text{C}_6\text{D}_6$ ) of [(BrettPhos)Pd(4- $\text{CF}_3\text{Ph}$ )( $\text{OCF}_3$ )] 5b**

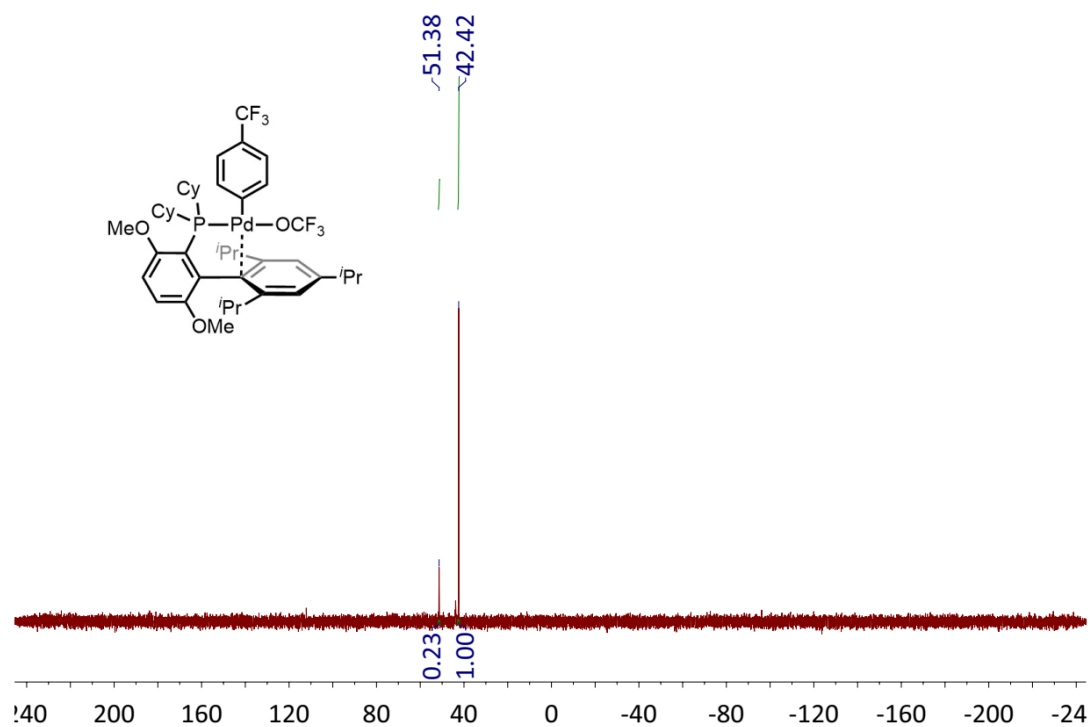

**$^1\text{H}$  NMR spectrum (600 MHz,  $\text{C}_6\text{D}_6$ ) of [(RuPhos)Pd(4- $\text{CF}_3\text{Ph}$ )( $\text{OCF}_3$ )] 5c**

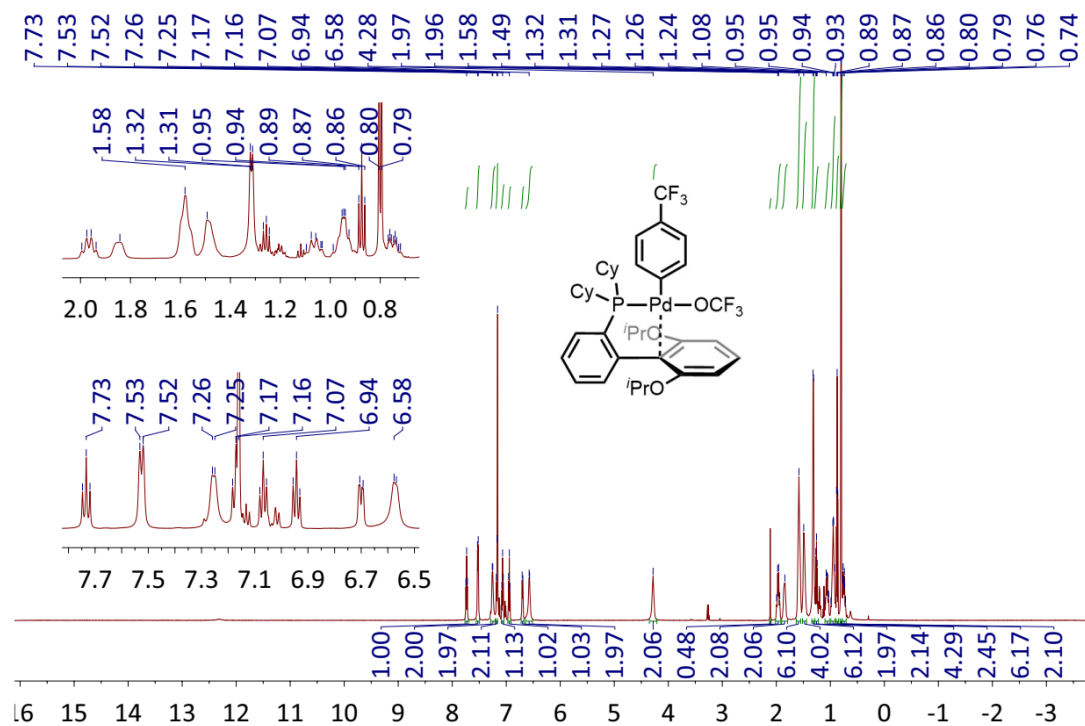

$^{19}\text{F}$  NMR spectrum (565 MHz,  $\text{C}_6\text{D}_6$ , 298 K) of  $[(\text{RuPhos})\text{Pd}(4\text{-CF}_3\text{Ph})(\text{OCF}_3)]$  5c

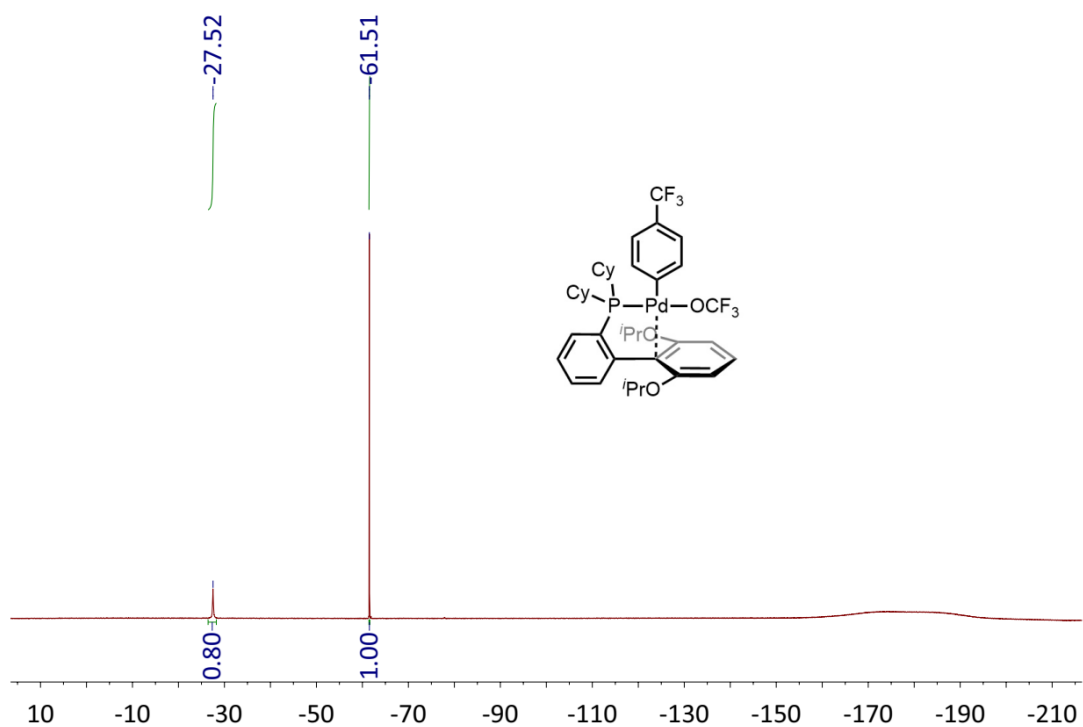

$^{19}\text{F}$  NMR spectrum (565 MHz,  $\text{C}_6\text{D}_6$ , 283 K) of  $[(\text{RuPhos})\text{Pd}(4\text{-CF}_3\text{Ph})(\text{OCF}_3)]$  5c

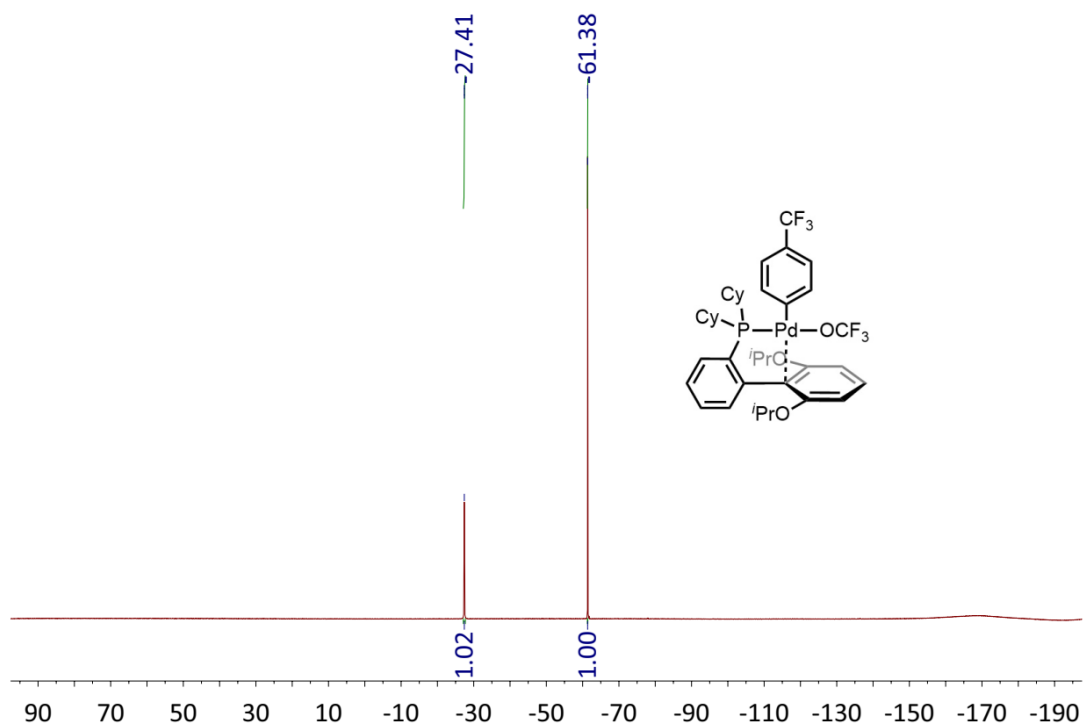



**$^{31}\text{P}$  NMR spectrum (243 MHz,  $\text{C}_6\text{D}_6$ ) of  $[(\text{RuPhos})\text{Pd}(4\text{-CF}_3\text{Ph})(\text{OCF}_3)]$  5c**

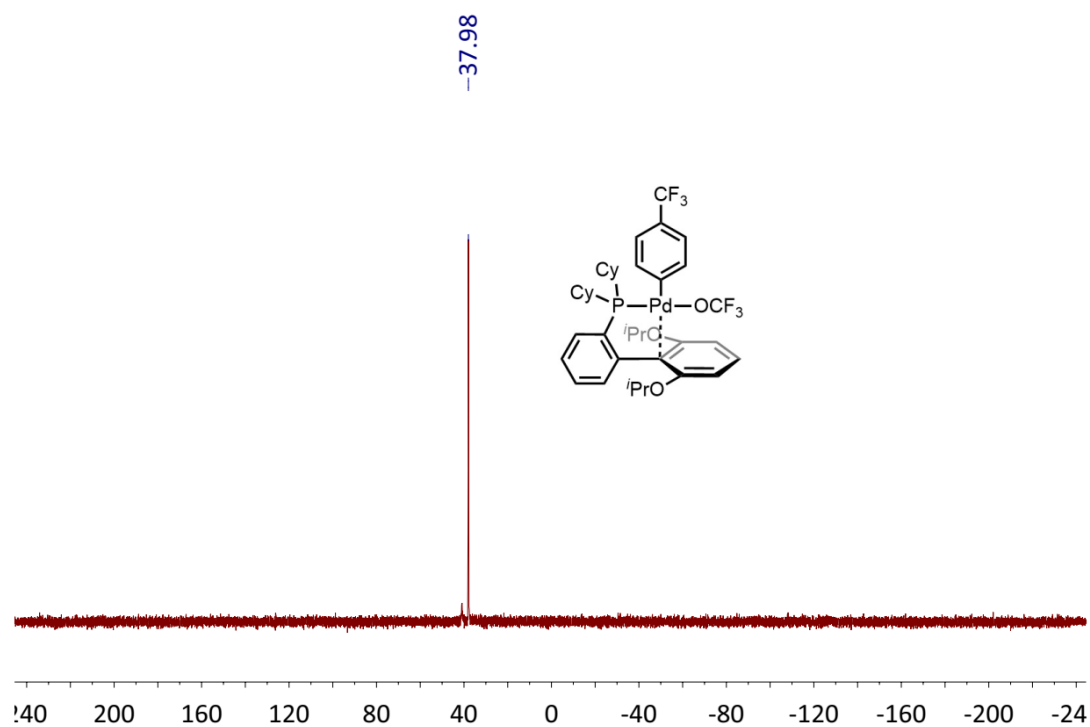

**$^1\text{H}$  NMR spectrum (400 MHz,  $\text{C}_6\text{D}_6$ ) of  $[(\text{CPhos})\text{Pd}(4\text{-CF}_3\text{Ph})(\text{OCF}_3)]$  5d**

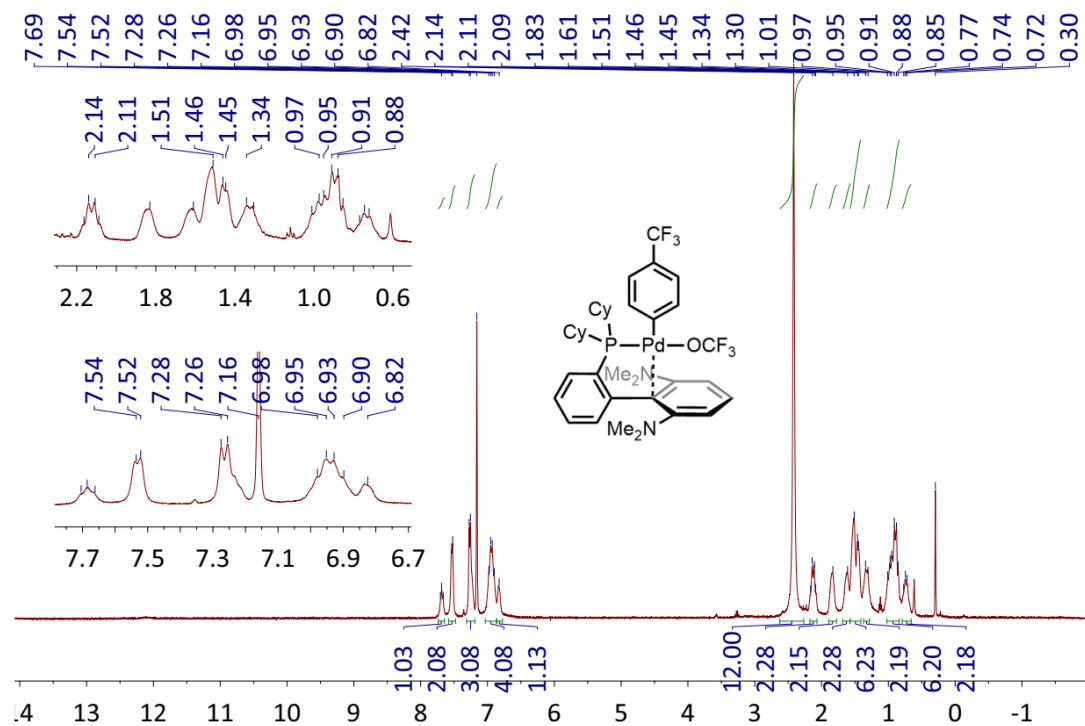

**$^{19}\text{F}$  NMR spectrum (376 MHz,  $\text{C}_6\text{D}_6$ ) of [(CPhos)Pd(4- $\text{CF}_3\text{Ph}$ )( $\text{OCF}_3$ )] 5d**

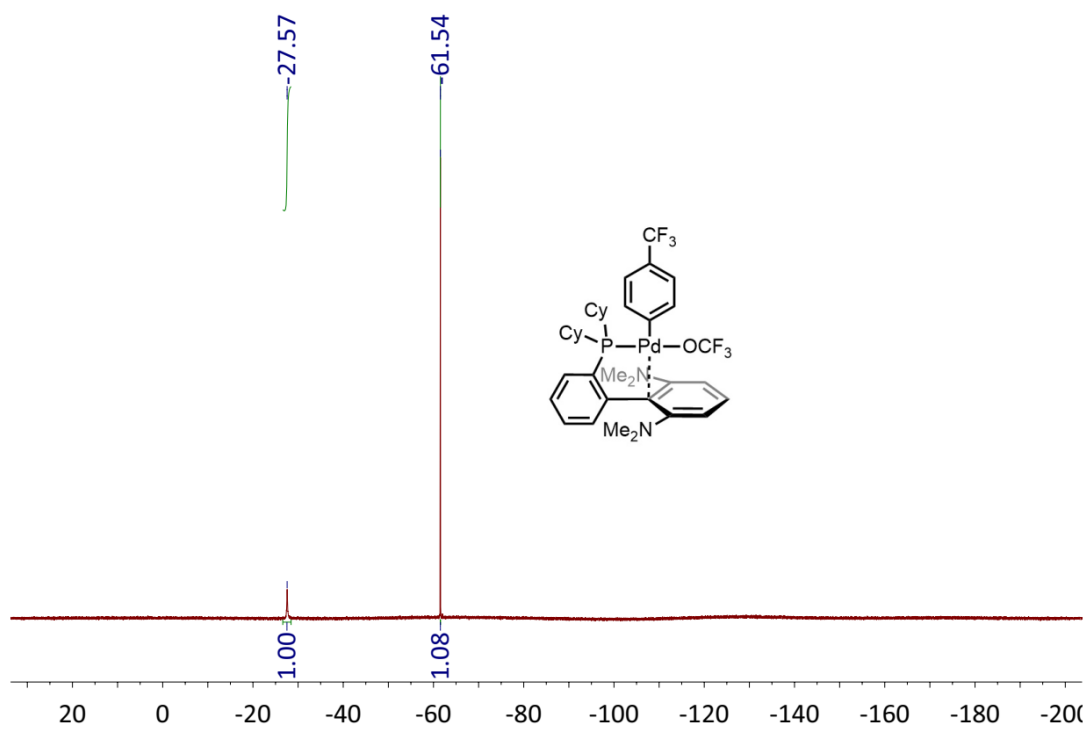

**$^{31}\text{P}$  NMR spectrum (162 MHz,  $\text{C}_6\text{D}_6$ ) of [(CPhos)Pd(4- $\text{CF}_3\text{Ph}$ )( $\text{OCF}_3$ )] 5d**

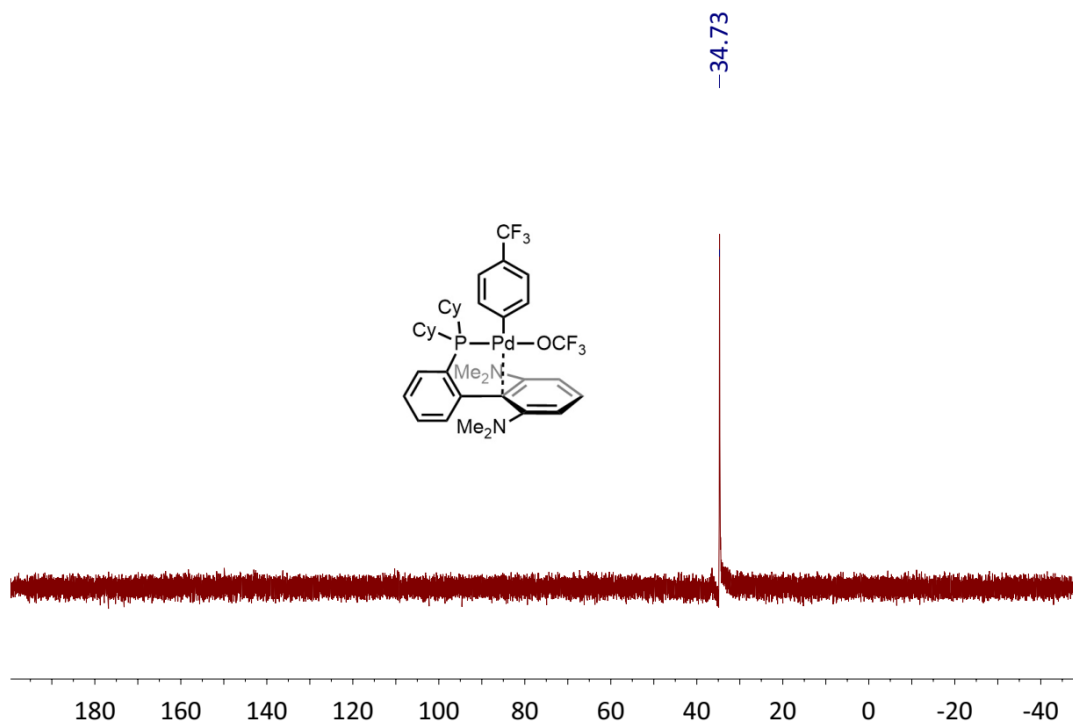

**X-ray diffraction data of complexes 2a, 2b, 3b', 3c, 5a**

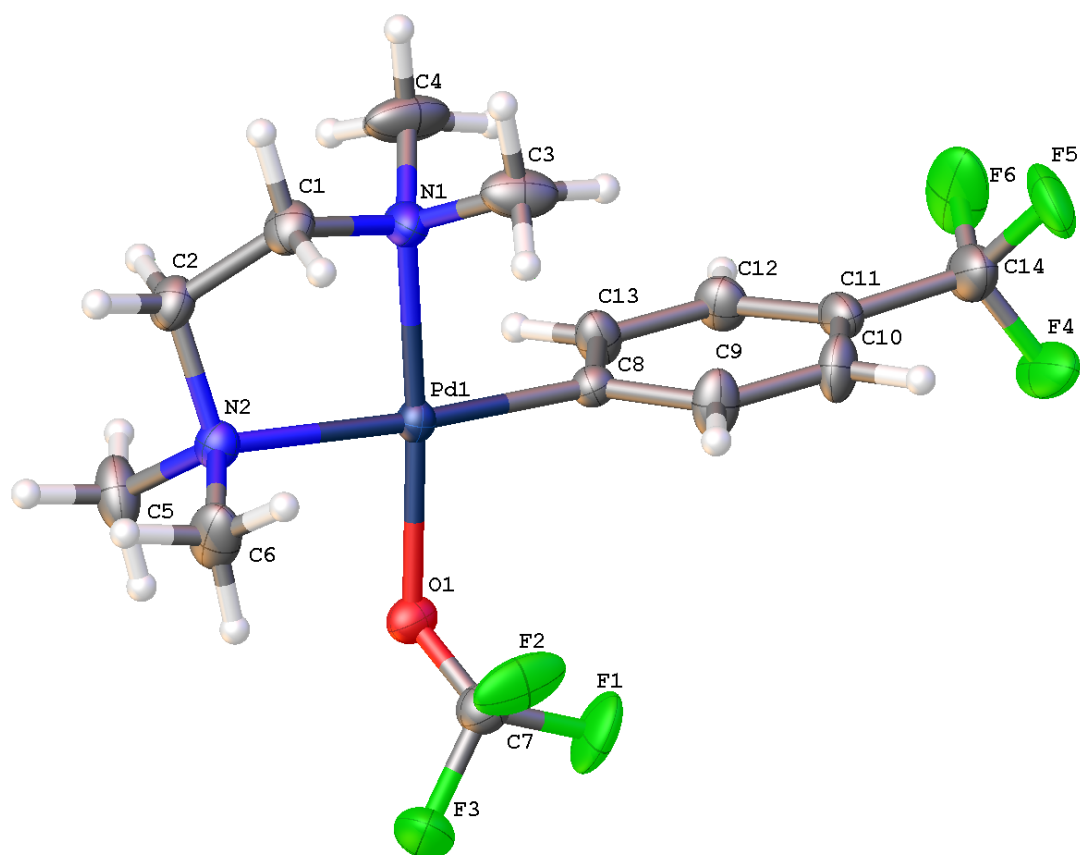

**Figure S3.** ORTEP diagrams of  $[(\text{TMEDA})\text{Pd}(4\text{-CF}_3\text{Ph})(\text{OCF}_3)]$  **2a**.

**Table S1-1.** Crystal data and structure refinement for **2a**.

|                                   |                                                                    |          |
|-----------------------------------|--------------------------------------------------------------------|----------|
| Identification code               | mo_d8v191192_0m                                                    |          |
| Empirical formula                 | C <sub>14</sub> H <sub>20</sub> F <sub>6</sub> N <sub>2</sub> O Pd |          |
| Formula weight                    | 452.72                                                             |          |
| Temperature                       | 193(2) K                                                           |          |
| Wavelength                        | 0.71073 Å                                                          |          |
| Crystal system                    | Tetragonal                                                         |          |
| Space group                       | I 41 c d                                                           |          |
| Unit cell dimensions              | a = 22.1489(5) Å                                                   | α = 90°. |
|                                   | b = 22.1489(5) Å                                                   | β = 90°. |
|                                   | c = 14.1421(3) Å                                                   | γ = 90°. |
| Volume                            | 6937.7(3) Å <sup>3</sup>                                           |          |
| Z                                 | 16                                                                 |          |
| Density (calculated)              | 1.734 Mg/m <sup>3</sup>                                            |          |
| Absorption coefficient            | 1.133 mm <sup>-1</sup>                                             |          |
| F(000)                            | 3616                                                               |          |
| Crystal size                      | 0.180 x 0.150 x 0.110 mm <sup>3</sup>                              |          |
| Theta range for data collection   | 2.510 to 25.996°.                                                  |          |
| Index ranges                      | -27 ≤ h ≤ 23, -22 ≤ k ≤ 27, -17 ≤ l ≤ 17                           |          |
| Reflections collected             | 16497                                                              |          |
| Independent reflections           | 3401 [R(int) = 0.0249]                                             |          |
| Completeness to theta = 25.242°   | 99.5 %                                                             |          |
| Absorption correction             | Semi-empirical from equivalents                                    |          |
| Max. and min. transmission        | 0.7456 and 0.5885                                                  |          |
| Refinement method                 | Full-matrix least-squares on F <sup>2</sup>                        |          |
| Data / restraints / parameters    | 3401 / 111 / 293                                                   |          |
| Goodness-of-fit on F <sup>2</sup> | 1.054                                                              |          |
| Final R indices [I > 2σ(I)]       | R1 = 0.0178, wR2 = 0.0416                                          |          |
| R indices (all data)              | R1 = 0.0193, wR2 = 0.0424                                          |          |
| Absolute structure parameter      | -0.028(10)                                                         |          |
| Extinction coefficient            | n/a                                                                |          |
| Largest diff. peak and hole       | 0.213 and -0.327 e.Å <sup>-3</sup>                                 |          |

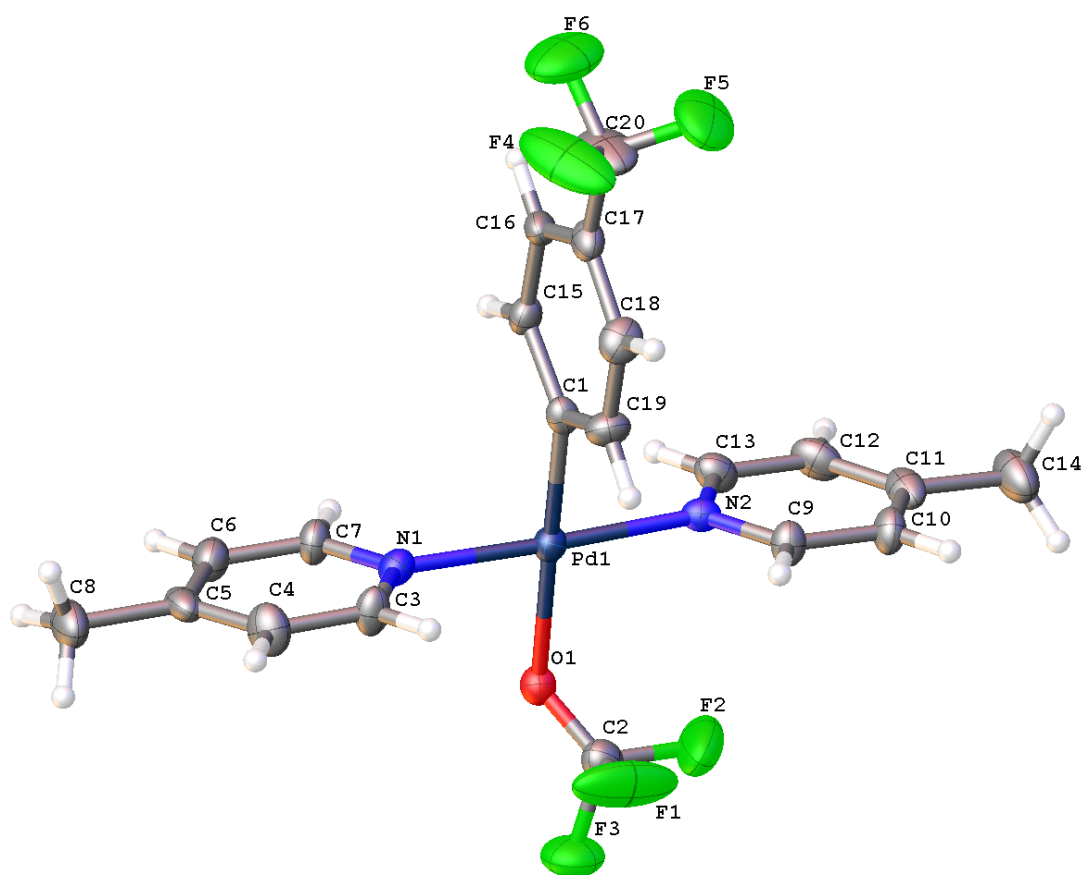

**Figure S4.** ORTEP diagrams of [*trans*-(4-CH<sub>3</sub>-py)<sub>2</sub>Pd(4-CF<sub>3</sub>Ph)(OCF<sub>3</sub>)] **2b**.

**Table S2-1.** Crystal data and structure refinement for **2b**.

|                                   |                                                                    |                  |
|-----------------------------------|--------------------------------------------------------------------|------------------|
| Identification code               | mj20037_0m                                                         |                  |
| Empirical formula                 | C <sub>20</sub> H <sub>18</sub> F <sub>6</sub> N <sub>2</sub> O Pd |                  |
| Formula weight                    | 522.76                                                             |                  |
| Temperature                       | 170.0 K                                                            |                  |
| Wavelength                        | 1.34139 Å                                                          |                  |
| Crystal system                    | Monoclinic                                                         |                  |
| Space group                       | P 1 2 <sub>1</sub> /n 1                                            |                  |
| Unit cell dimensions              | a = 13.1935(5) Å                                                   | α = 90°.         |
|                                   | b = 11.4522(5) Å                                                   | β = 105.432(3)°. |
|                                   | c = 14.0786(6) Å                                                   | γ = 90°.         |
| Volume                            | 2050.51(15) Å <sup>3</sup>                                         |                  |
| Z                                 | 4                                                                  |                  |
| Density (calculated)              | 1.693 Mg/m <sup>3</sup>                                            |                  |
| Absorption coefficient            | 5.273 mm <sup>-1</sup>                                             |                  |
| F(000)                            | 1040                                                               |                  |
| Crystal size                      | 0.05 x 0.03 x 0.02 mm <sup>3</sup>                                 |                  |
| Theta range for data collection   | 3.551 to 54.995°.                                                  |                  |
| Index ranges                      | -16 ≤ h ≤ 16, -13 ≤ k ≤ 11, -17 ≤ l ≤ 17                           |                  |
| Reflections collected             | 20044                                                              |                  |
| Independent reflections           | 3867 [R(int) = 0.1270]                                             |                  |
| Completeness to theta = 53.594°   | 99.1 %                                                             |                  |
| Absorption correction             | Semi-empirical from equivalents                                    |                  |
| Max. and min. transmission        | 0.7508 and 0.4564                                                  |                  |
| Refinement method                 | Full-matrix least-squares on F <sup>2</sup>                        |                  |
| Data / restraints / parameters    | 3867 / 31 / 273                                                    |                  |
| Goodness-of-fit on F <sup>2</sup> | 1.059                                                              |                  |
| Final R indices [I > 2σ(I)]       | R1 = 0.0908, wR2 = 0.2048                                          |                  |
| R indices (all data)              | R1 = 0.1456, wR2 = 0.2376                                          |                  |
| Extinction coefficient            | n/a                                                                |                  |
| Largest diff. peak and hole       | 1.705 and -1.624 e.Å <sup>-3</sup>                                 |                  |

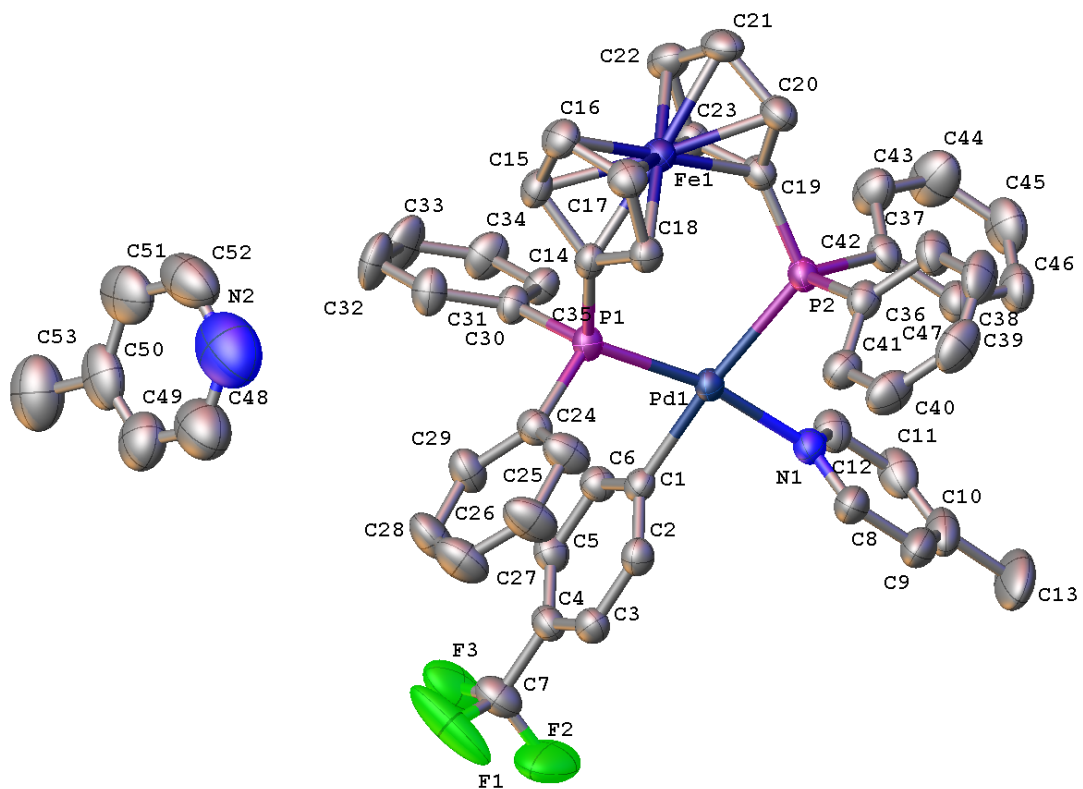

**Figure S5.** ORTEP diagrams of  $[(\text{DPPF})\text{Pd}(4\text{-CF}_3\text{Ph})(4\text{-MePy})\cdot(4\text{-MePy})]$  **3b'**.

**Table S3-1.** Crystal data and structure refinement for **3b'**.

|                                   |                                             |                               |
|-----------------------------------|---------------------------------------------|-------------------------------|
| Identification code               | mj19744_0m                                  |                               |
| Empirical formula                 | C106 H92 F6 Fe2 N4 P4 Pd2                   |                               |
| Formula weight                    | 1984.21                                     |                               |
| Temperature                       | 169.96 K                                    |                               |
| Wavelength                        | 1.34139 Å                                   |                               |
| Crystal system                    | Monoclinic                                  |                               |
| Space group                       | P 1 21/c 1                                  |                               |
| Unit cell dimensions              | a = 10.3574(2) Å                            | $\alpha = 90^\circ$ .         |
|                                   | b = 17.7893(3) Å                            | $\beta = 95.5760(10)^\circ$ . |
|                                   | c = 27.4578(5) Å                            | $\gamma = 90^\circ$ .         |
| Volume                            | 5035.19(16) Å <sup>3</sup>                  |                               |
| Z                                 | 2                                           |                               |
| Density (calculated)              | 1.309 Mg/m <sup>3</sup>                     |                               |
| Absorption coefficient            | 4.116 mm <sup>-1</sup>                      |                               |
| F(000)                            | 2028                                        |                               |
| Crystal size                      | 0.08 x 0.06 x 0.05 mm <sup>3</sup>          |                               |
| Theta range for data collection   | 3.548 to 54.976°.                           |                               |
| Index ranges                      | -12 ≤ h ≤ 12, -21 ≤ k ≤ 21, -33 ≤ l ≤ 32    |                               |
| Reflections collected             | 65324                                       |                               |
| Independent reflections           | 9569 [R(int) = 0.0553]                      |                               |
| Completeness to theta = 53.594°   | 99.9 %                                      |                               |
| Absorption correction             | Semi-empirical from equivalents             |                               |
| Max. and min. transmission        | 0.7508 and 0.4841                           |                               |
| Refinement method                 | Full-matrix least-squares on F <sup>2</sup> |                               |
| Data / restraints / parameters    | 9569 / 0 / 561                              |                               |
| Goodness-of-fit on F <sup>2</sup> | 1.018                                       |                               |
| Final R indices [I > 2σ(I)]       | R1 = 0.0420, wR2 = 0.1032                   |                               |
| R indices (all data)              | R1 = 0.0553, wR2 = 0.1105                   |                               |
| Extinction coefficient            | n/a                                         |                               |
| Largest diff. peak and hole       | 0.524 and -0.741 e.Å <sup>-3</sup>          |                               |



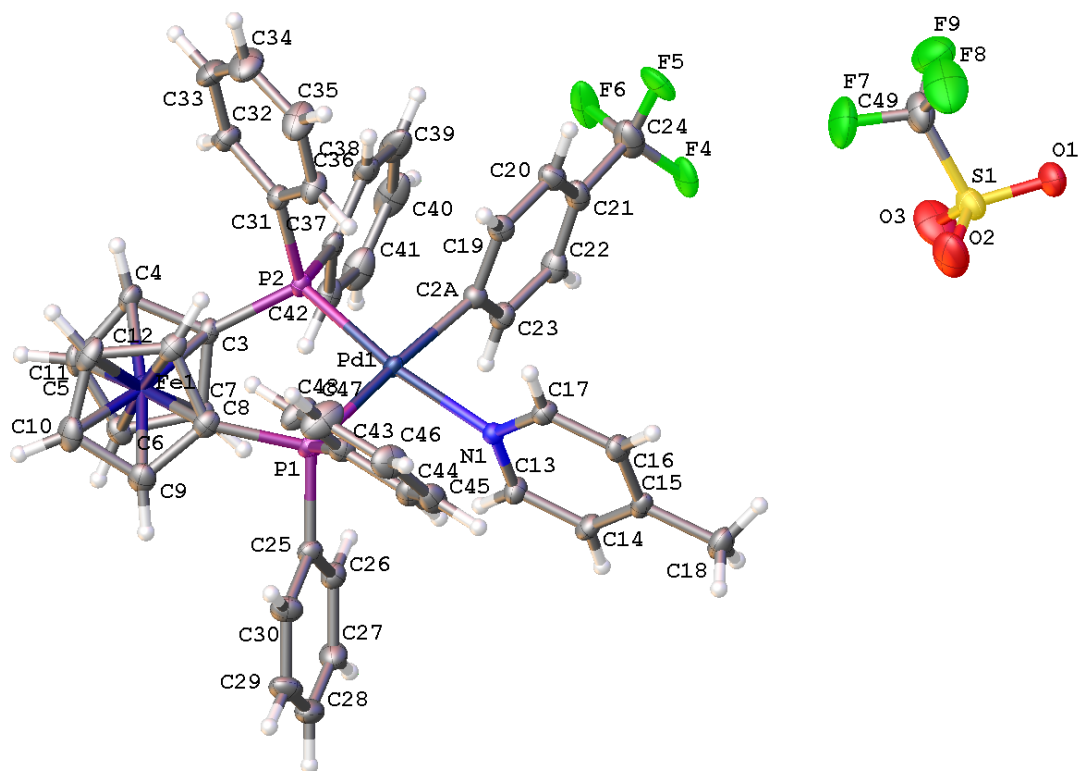

**Figure S6.** ORTEP diagrams of [(DPPF)Pd(4-CH<sub>3</sub>-Py)(4-CF<sub>3</sub>-Ph)][OTf] **3c**.

**Table S4-1.** Crystal data and structure refinement for **3c**.

|                                   |                                                                                        |          |
|-----------------------------------|----------------------------------------------------------------------------------------|----------|
| Identification code               | mj22132                                                                                |          |
| Empirical formula                 | C <sub>48</sub> H <sub>39</sub> F <sub>6</sub> Fe N O <sub>3</sub> P <sub>2</sub> Pd S |          |
| Formula weight                    | 1048.05                                                                                |          |
| Temperature                       | 213.0 K                                                                                |          |
| Wavelength                        | 1.34139 Å                                                                              |          |
| Crystal system                    | Orthorhombic                                                                           |          |
| Space group                       | Pbca                                                                                   |          |
| Unit cell dimensions              | a = 21.6907(5) Å                                                                       | α = 90°. |
|                                   | b = 17.7028(4) Å                                                                       | β = 90°. |
|                                   | c = 22.6847(5) Å                                                                       | γ = 90°. |
| Volume                            | 8710.6(3) Å <sup>3</sup>                                                               |          |
| Z                                 | 8                                                                                      |          |
| Density (calculated)              | 1.598 Mg/m <sup>3</sup>                                                                |          |
| Absorption coefficient            | 5.205 mm <sup>-1</sup>                                                                 |          |
| F(000)                            | 4240                                                                                   |          |
| Crystal size                      | 0.07 x 0.07 x 0.05 mm <sup>3</sup>                                                     |          |
| Theta range for data collection   | 3.276 to 54.877°.                                                                      |          |
| Index ranges                      | -26 ≤ h ≤ 26, -21 ≤ k ≤ 21, -27 ≤ l ≤ 26                                               |          |
| Reflections collected             | 88491                                                                                  |          |
| Independent reflections           | 8247 [R(int) = 0.0699]                                                                 |          |
| Completeness to theta = 53.594°   | 99.7 %                                                                                 |          |
| Absorption correction             | Semi-empirical from equivalents                                                        |          |
| Max. and min. transmission        | 0.7510 and 0.5513                                                                      |          |
| Refinement method                 | Full-matrix least-squares on F <sup>2</sup>                                            |          |
| Data / restraints / parameters    | 8247 / 48 / 587                                                                        |          |
| Goodness-of-fit on F <sup>2</sup> | 1.053                                                                                  |          |
| Final R indices [I > 2σ(I)]       | R1 = 0.0348, wR2 = 0.0844                                                              |          |
| R indices (all data)              | R1 = 0.0456, wR2 = 0.0896                                                              |          |
| Extinction coefficient            | n/a                                                                                    |          |
| Largest diff. peak and hole       | 0.467 and -0.784 e.Å <sup>-3</sup>                                                     |          |

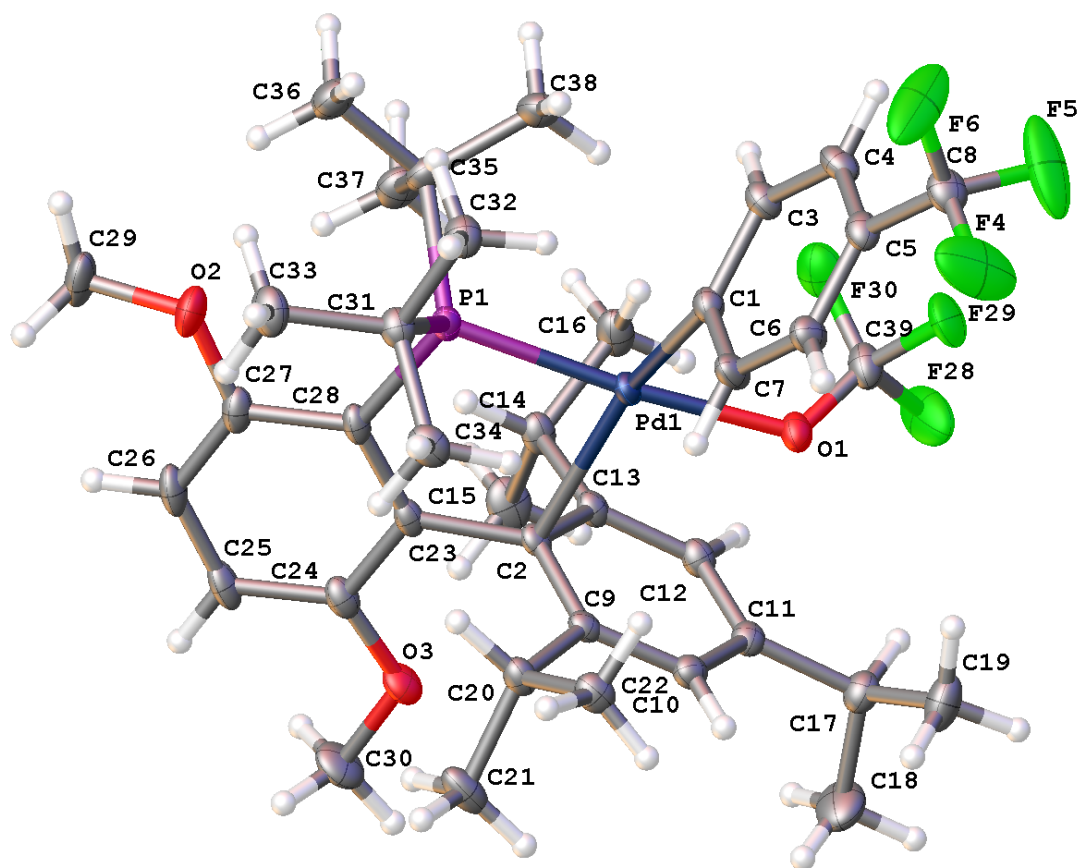

**Figure S7.** ORTEP diagrams of [(<sup>t</sup>-Bu-BrettPhos)Pd(4-CF<sub>3</sub>Ph)(OCF<sub>3</sub>)] **5a**.

**Table S5-1.** Crystal data and structure refinement for **5a**.

|                                   |                                                                    |                 |
|-----------------------------------|--------------------------------------------------------------------|-----------------|
| Identification code               | mj20146_0m                                                         |                 |
| Empirical formula                 | C <sub>39</sub> H <sub>53</sub> F <sub>6</sub> O <sub>3</sub> P Pd |                 |
| Formula weight                    | 821.18                                                             |                 |
| Temperature                       | 170.05 K                                                           |                 |
| Wavelength                        | 1.34139 Å                                                          |                 |
| Crystal system                    | Triclinic                                                          |                 |
| Space group                       | P-1                                                                |                 |
| Unit cell dimensions              | a = 12.1827(4) Å                                                   | α = 87.361(2)°. |
|                                   | b = 12.7262(4) Å                                                   | β = 71.886(2)°. |
|                                   | c = 13.4392(4) Å                                                   | γ = 80.533(2)°. |
| Volume                            | 1953.34(11) Å <sup>3</sup>                                         |                 |
| Z                                 | 2                                                                  |                 |
| Density (calculated)              | 1.396 Mg/m <sup>3</sup>                                            |                 |
| Absorption coefficient            | 3.158 mm <sup>-1</sup>                                             |                 |
| F(000)                            | 852                                                                |                 |
| Crystal size                      | 0.08 x 0.06 x 0.05 mm <sup>3</sup>                                 |                 |
| Theta range for data collection   | 3.010 to 54.996°.                                                  |                 |
| Index ranges                      | -14 ≤ h ≤ 14, -15 ≤ k ≤ 14, -16 ≤ l ≤ 16                           |                 |
| Reflections collected             | 28966                                                              |                 |
| Independent reflections           | 7427 [R(int) = 0.0494]                                             |                 |
| Completeness to theta = 53.594°   | 99.8 %                                                             |                 |
| Absorption correction             | Semi-empirical from equivalents                                    |                 |
| Max. and min. transmission        | 0.7508 and 0.5105                                                  |                 |
| Refinement method                 | Full-matrix least-squares on F <sup>2</sup>                        |                 |
| Data / restraints / parameters    | 7427 / 0 / 465                                                     |                 |
| Goodness-of-fit on F <sup>2</sup> | 1.031                                                              |                 |
| Final R indices [I > 2σ(I)]       | R1 = 0.0411, wR2 = 0.1055                                          |                 |
| R indices (all data)              | R1 = 0.0456, wR2 = 0.1092                                          |                 |
| Extinction coefficient            | n/a                                                                |                 |
| Largest diff. peak and hole       | 1.215 and -1.068 e.Å <sup>-3</sup>                                 |                 |
